# Supplementary material for: Discovery of 3-(1-Amino-2-phenoxyethylidene)-6-methyl-2H-pyran-2,4(3H)-dione Derivatives as Novel Herbicidal Leads
Source: MDPI journal article supplement (doi:10.3390/agronomy13010202), 2023-01-09
Supplement: s1 [file s1]

# Supporting Information

## Discovery of 3-(1-Amino-2-phenoxyethylidene)-6-methyl-2*H*-pyran-2,4(3*H*)-dione

### Derivatives as Novel Herbicidal Leads

Chao-Chao Wang<sup>1</sup>, Ke Chen<sup>2</sup>, Na Li<sup>1</sup>, Xue-Kun Wang<sup>1</sup>, Shi-Ben Wang<sup>1</sup>, Pan Li<sup>1</sup>, Xue-Wen Hua<sup>3</sup>,

Kang Lei<sup>\*,1</sup> and Lu-Sha Ji<sup>1</sup>

<sup>1</sup> School of Pharmaceutical Sciences, Liaocheng University, Liaocheng 252000, China

<sup>2</sup> Department of Bioscience and Biotechnology, The University of Suwon, Whasung 18323, Korea

<sup>3</sup> College of Agricultural Science and Engineering, Liaocheng University, Liaocheng 252000, China

\* Correspondence to: Kang Lei, E-mail: leikang@lcu.edu.cn

## Greenhouse Tests

Two dicotyledonous species *Abutilon theophrasti* Medicus (AM) and *Amaranthus retroflexus* L. (AR), and two monocotyledonous species *Echinochloa crus-galli* (EC) and *Digitaria sanguinalis* (L.) Scop. (DS) were used to test the herbicidal activities of the target compounds. For pre-emergence tests, sandy clay (100 g) in a 7-cm-diameter test pot was wetted by water. Then 15 sprouting seeds of the weed were planted to 0.6 cm depth and placed in a greenhouse. All the tested compounds were dissolved in 100 % DMF and then diluted with Tween-80 (concentration: 100 g/L). The resulting solutions were diluted with water to the appropriate concentrations before use. The solutions of the compounds evaluated were sprayed immediately after seed planting. The mixture of same amount of water, *N,N*-dimethylformamide and Tween 80 was sprayed as the control. After 14 days, the fresh weight of the above-ground tissues in each pot was weighed and the percentage of inhibition calculated. For post-emergence tests, the same solution of the compounds was applied at the same rate as for the pre-emergence tests. Compounds were sprayed immediately after the expansion of the first true leaf. After 21 days, the fresh weight of the above-ground tissues in each pot was weighed and the percentage of inhibition calculated. Each treatment was done in triplicate, all the experiments were performed under natural light conditions at 22-28 °C. Additionally, adverse weather lighting was provided using sodium vapour lamps with a 12 : 12 h light : dark photo period.

Formulas used in these tests are as follows: Control effect (%) = (the weight of live weeds in the control pots – the weight of live weeds in the treated pots)/the weight of live weeds in the control pots × 100%. The data represented the percent displaying herbicidal damage as compared to the control, where complete control of the target is 100 and no control is 0.

## The <sup>1</sup>H NMR, <sup>13</sup>C NMR and HRMS Spectrum of Target Compounds APD-I and APD-II

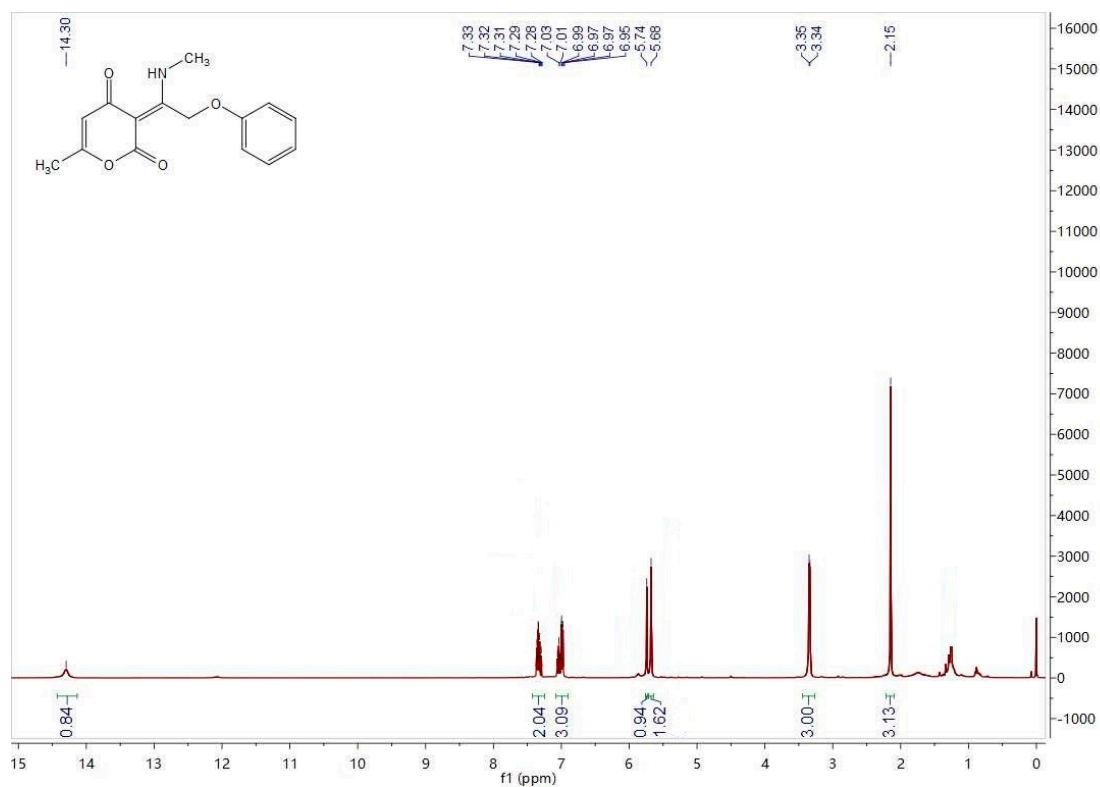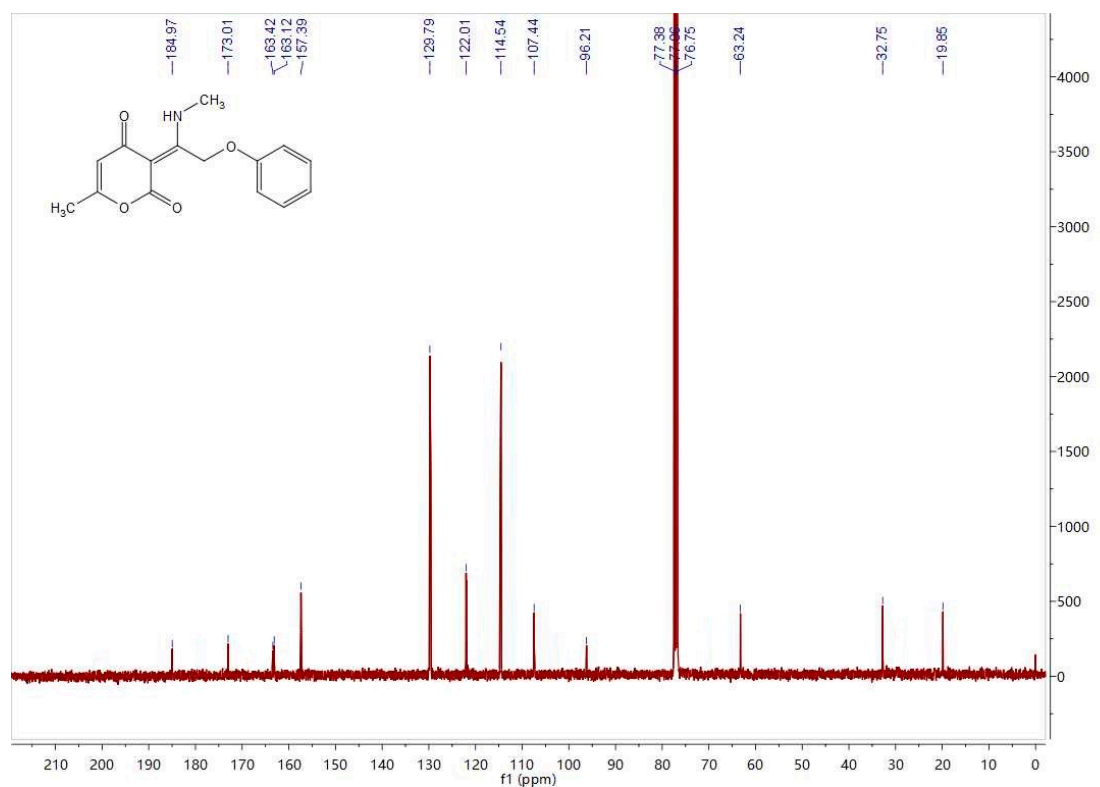

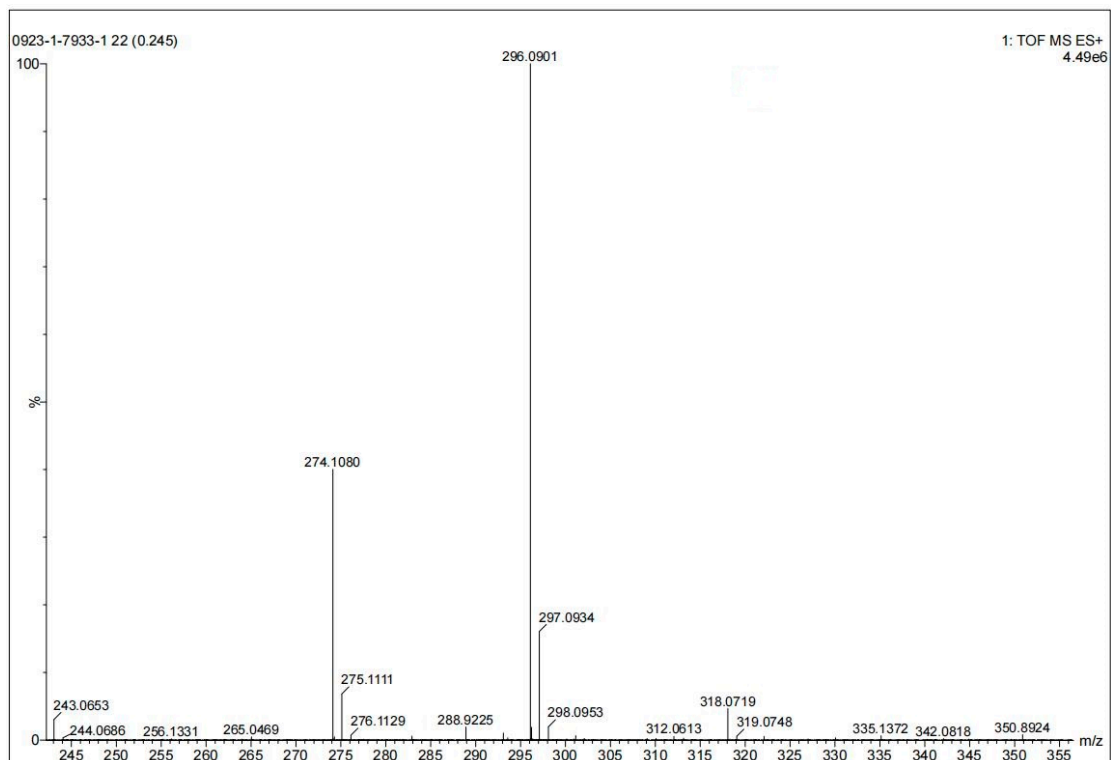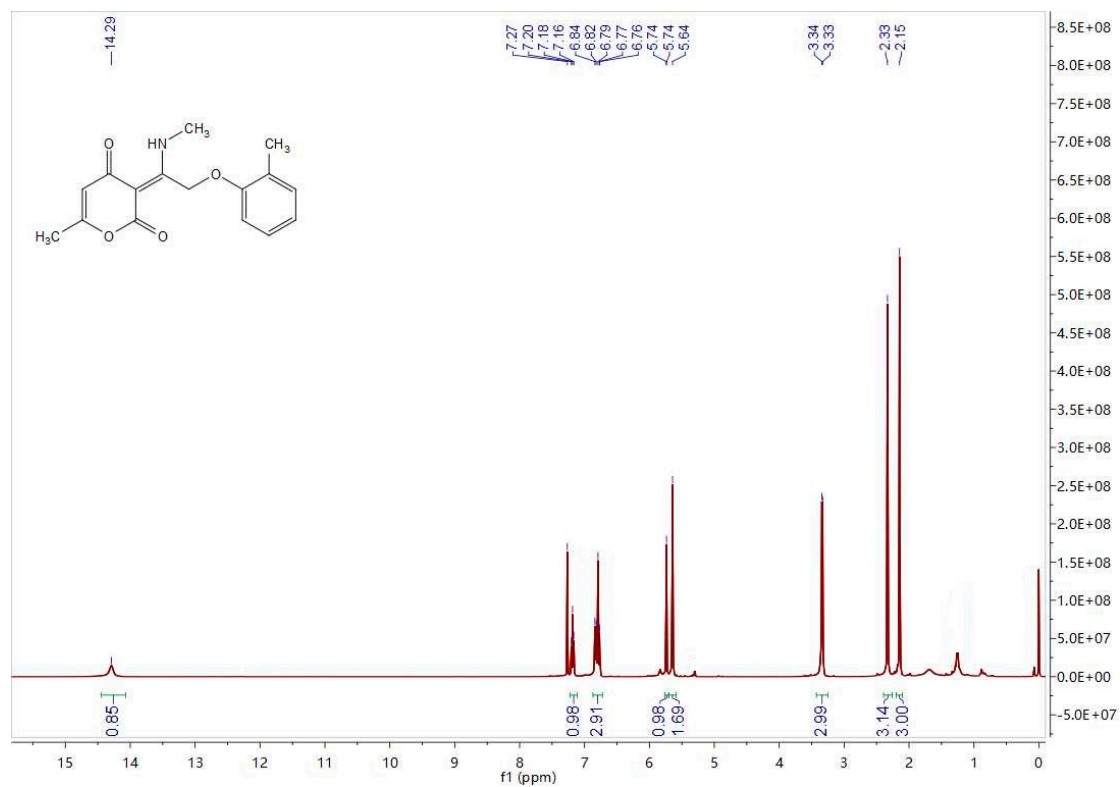



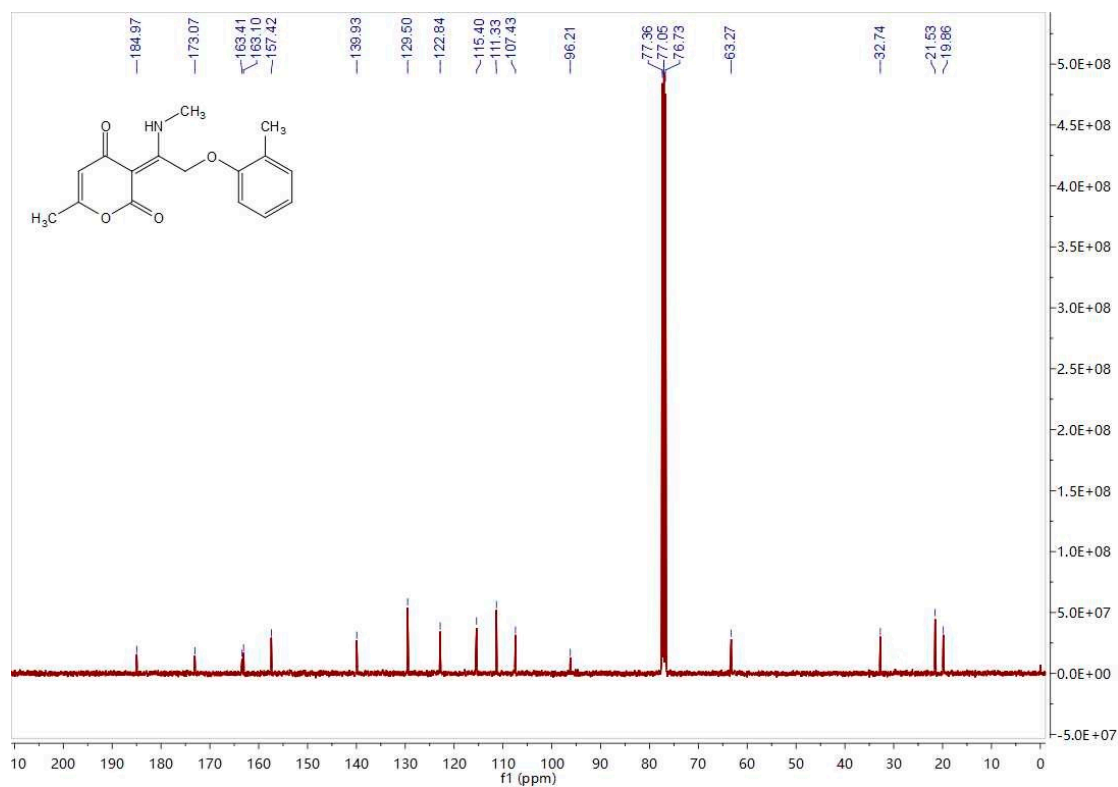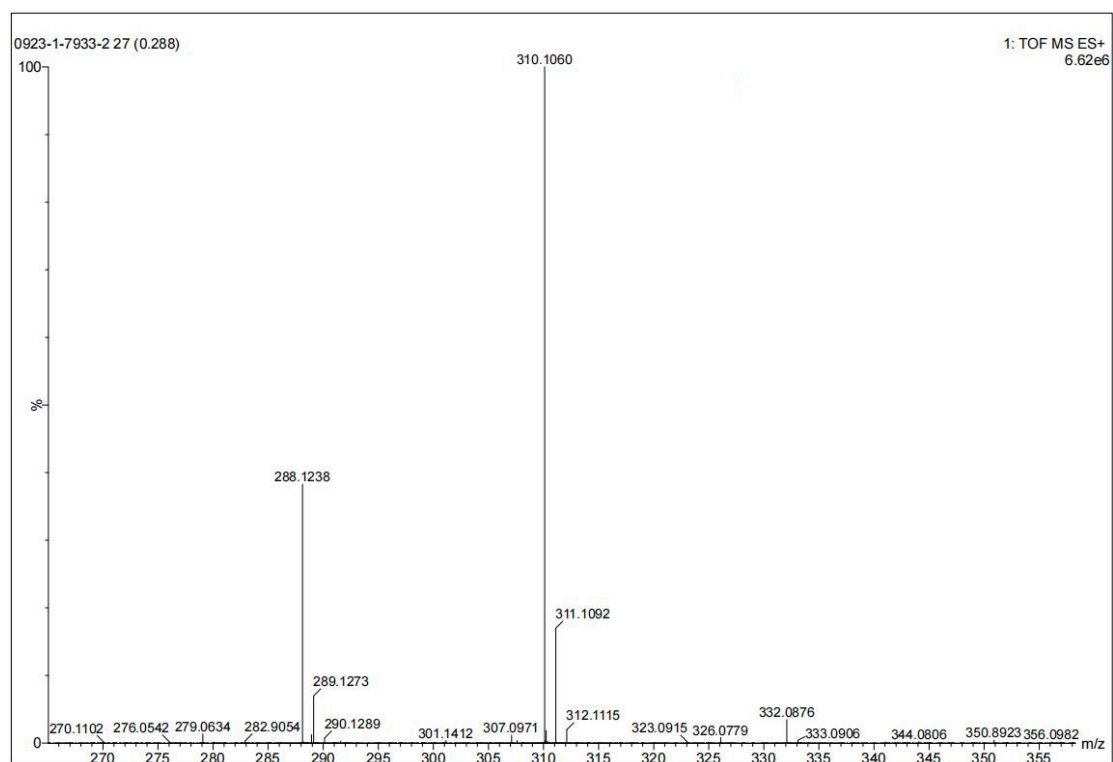

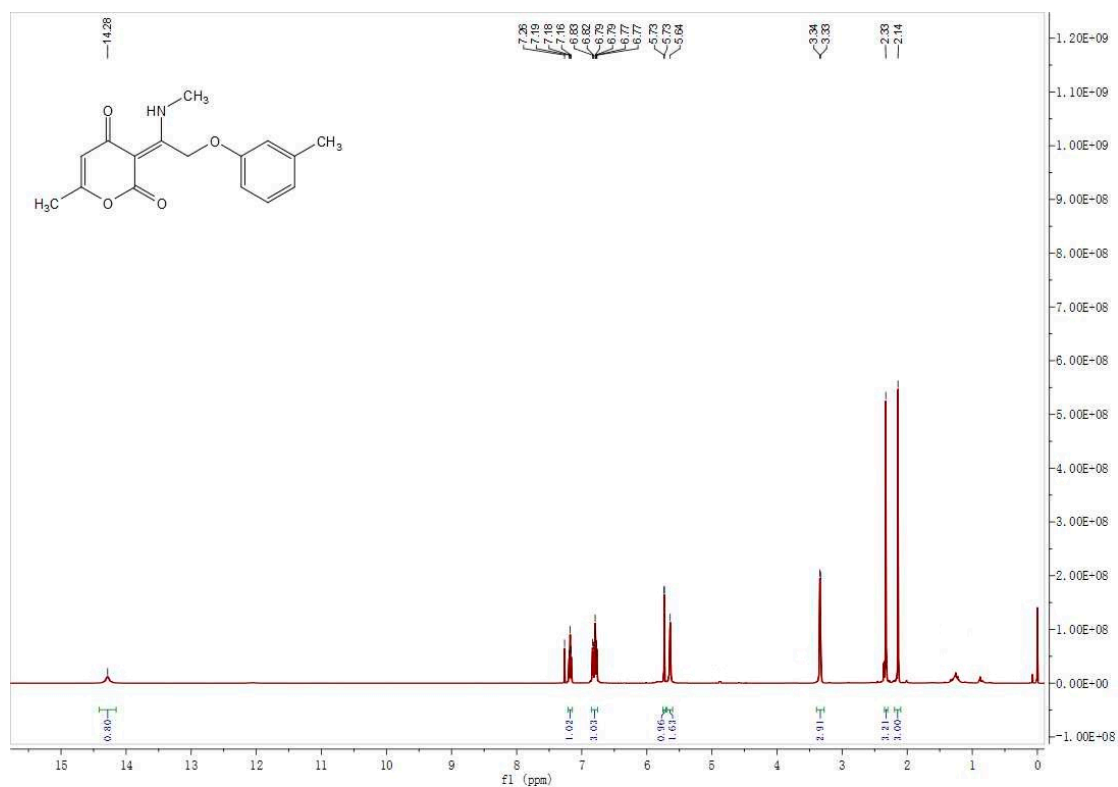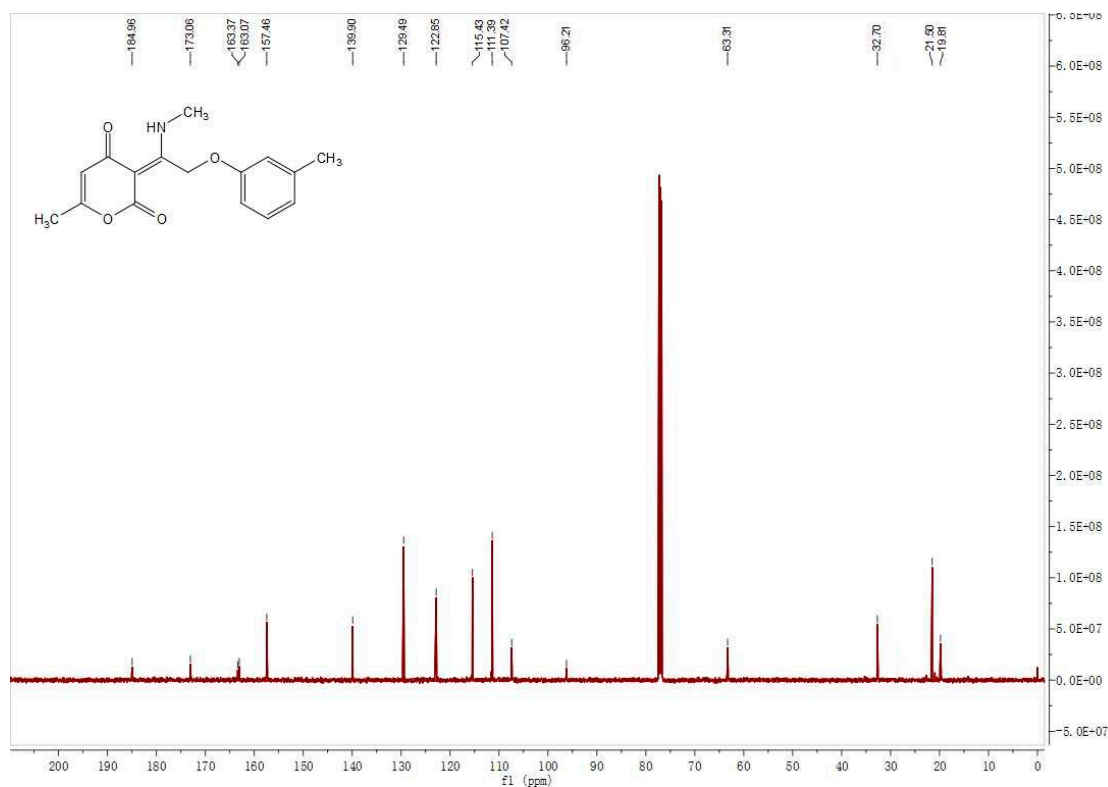

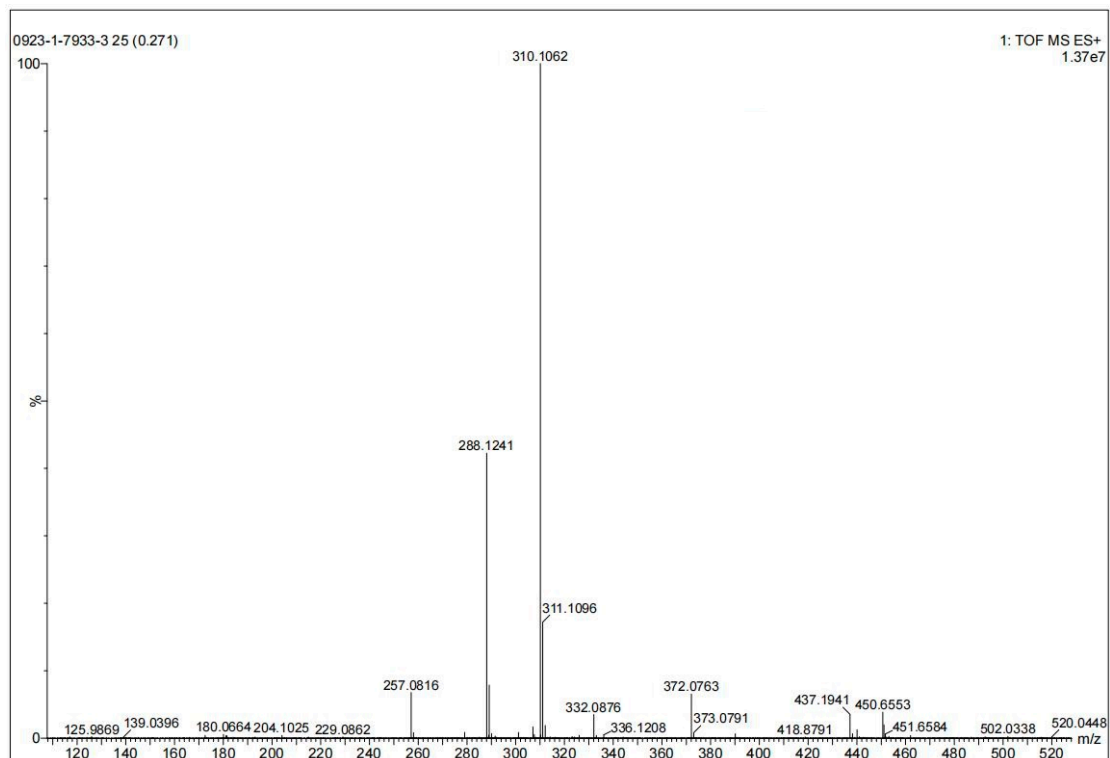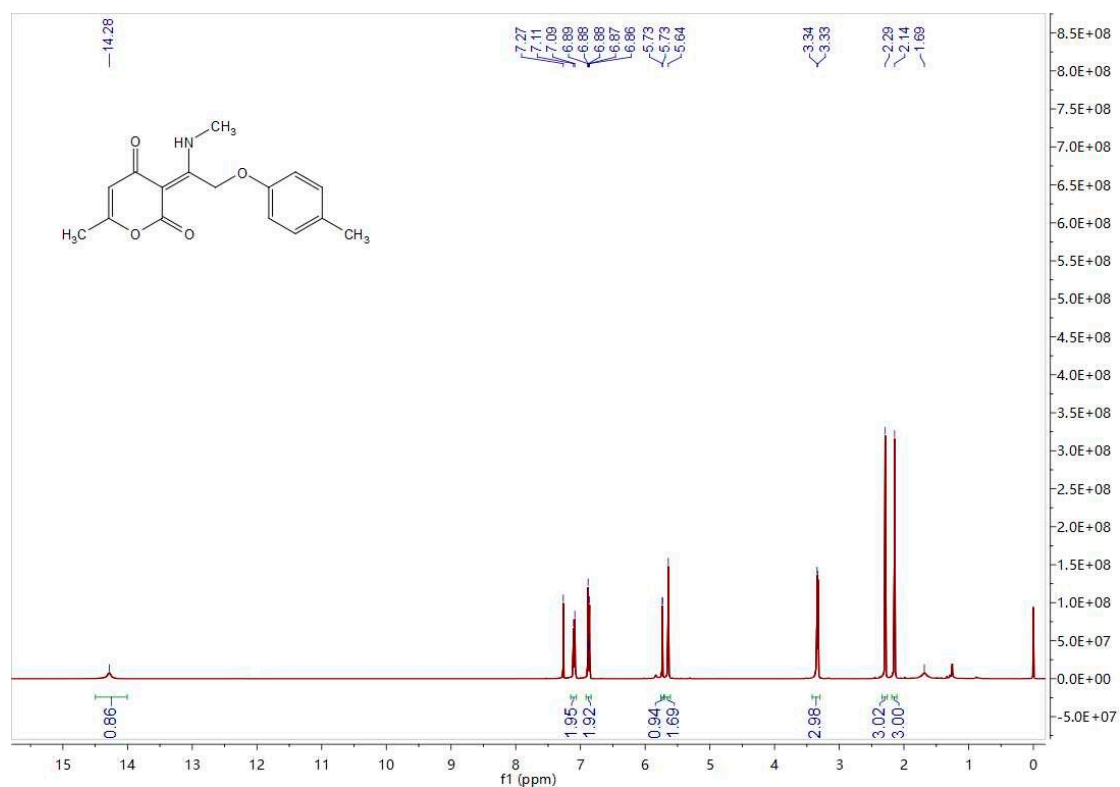

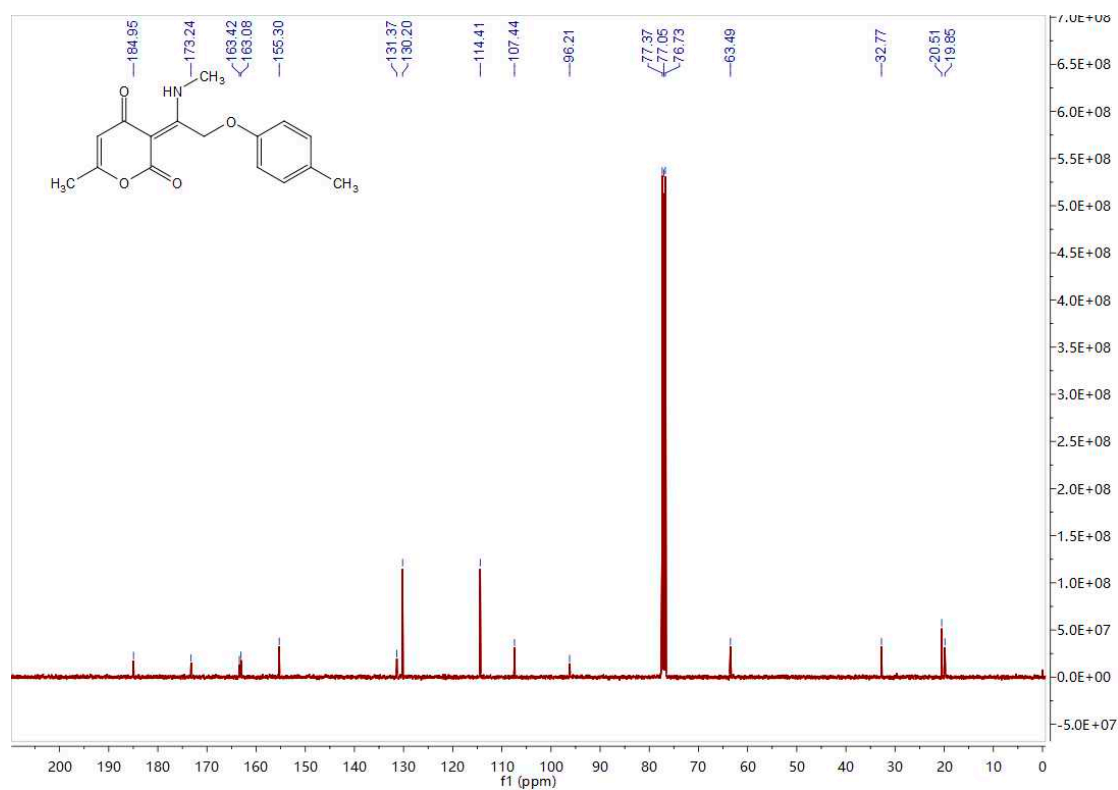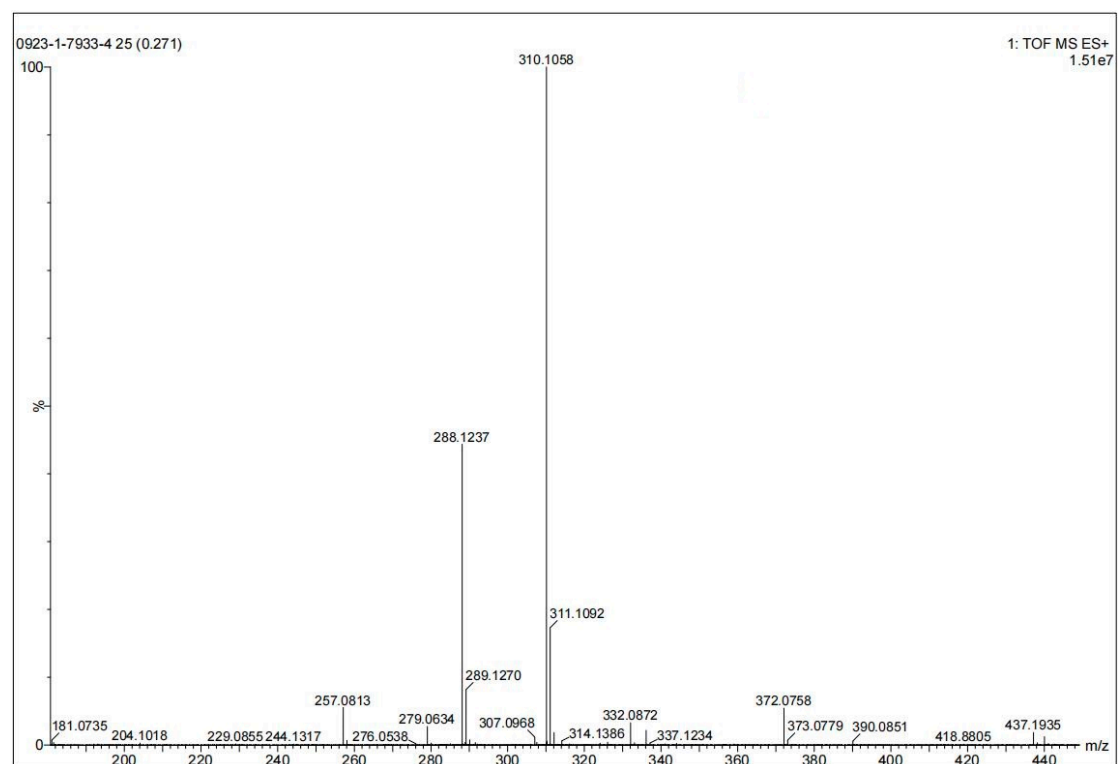

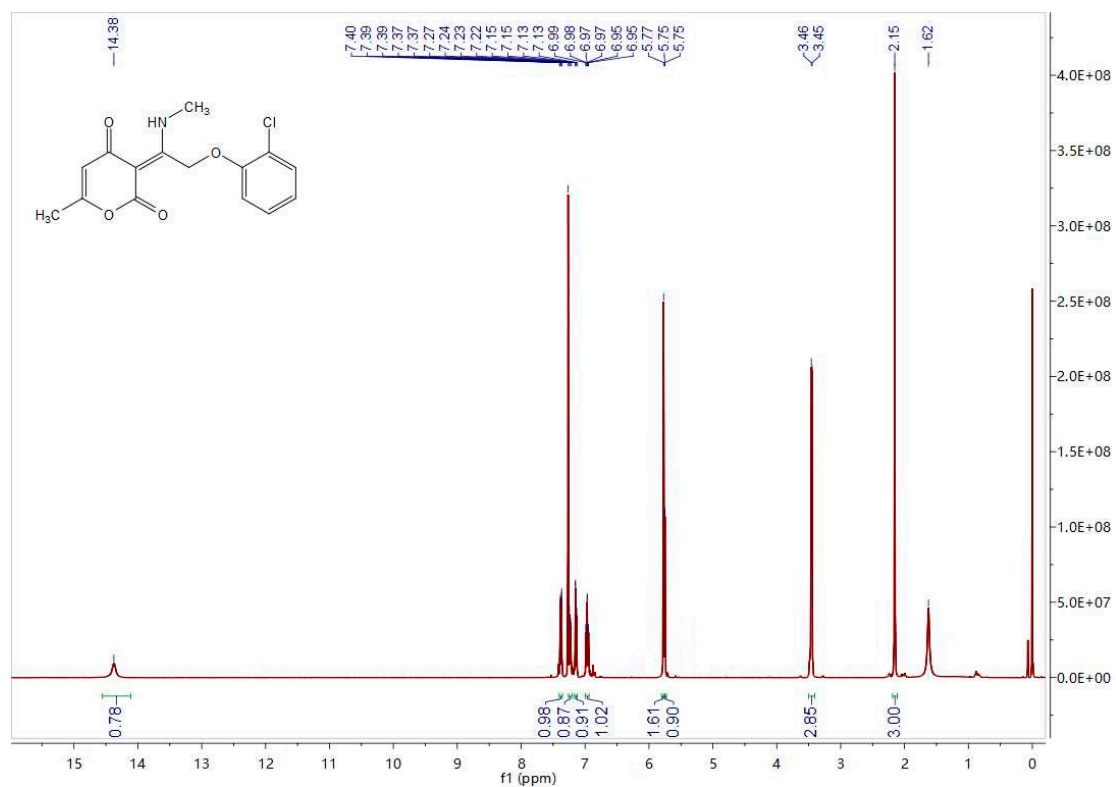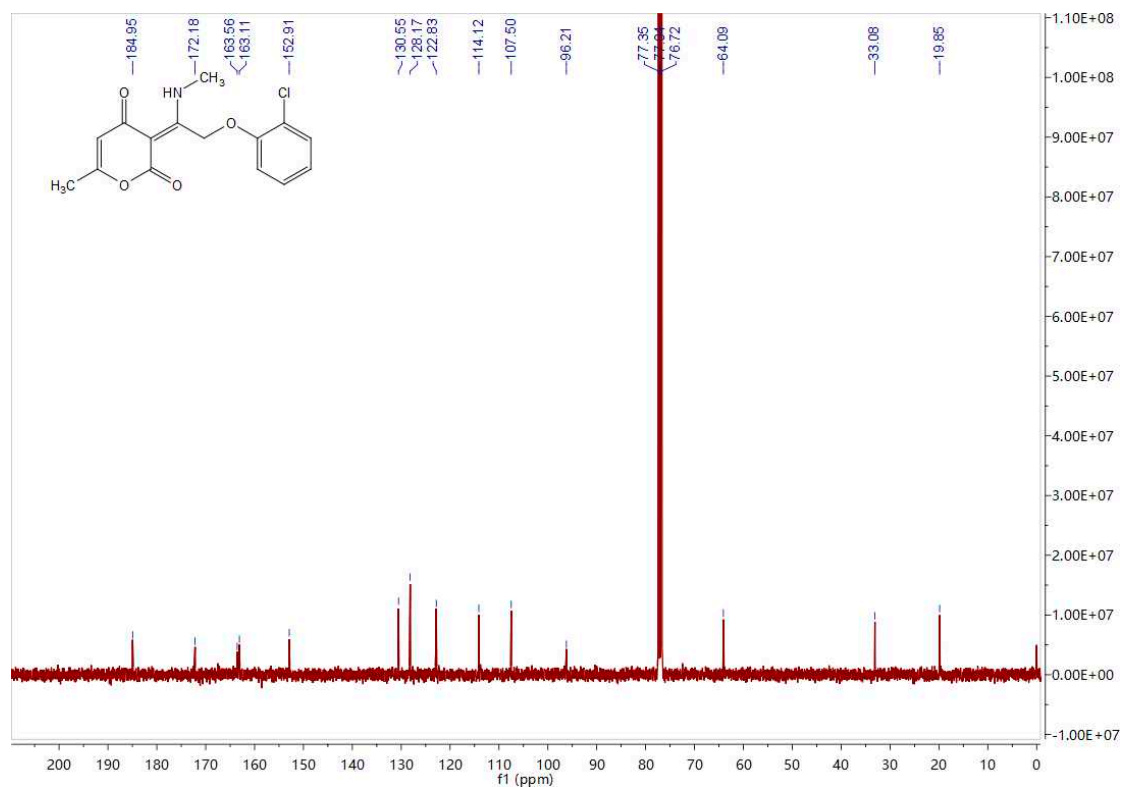

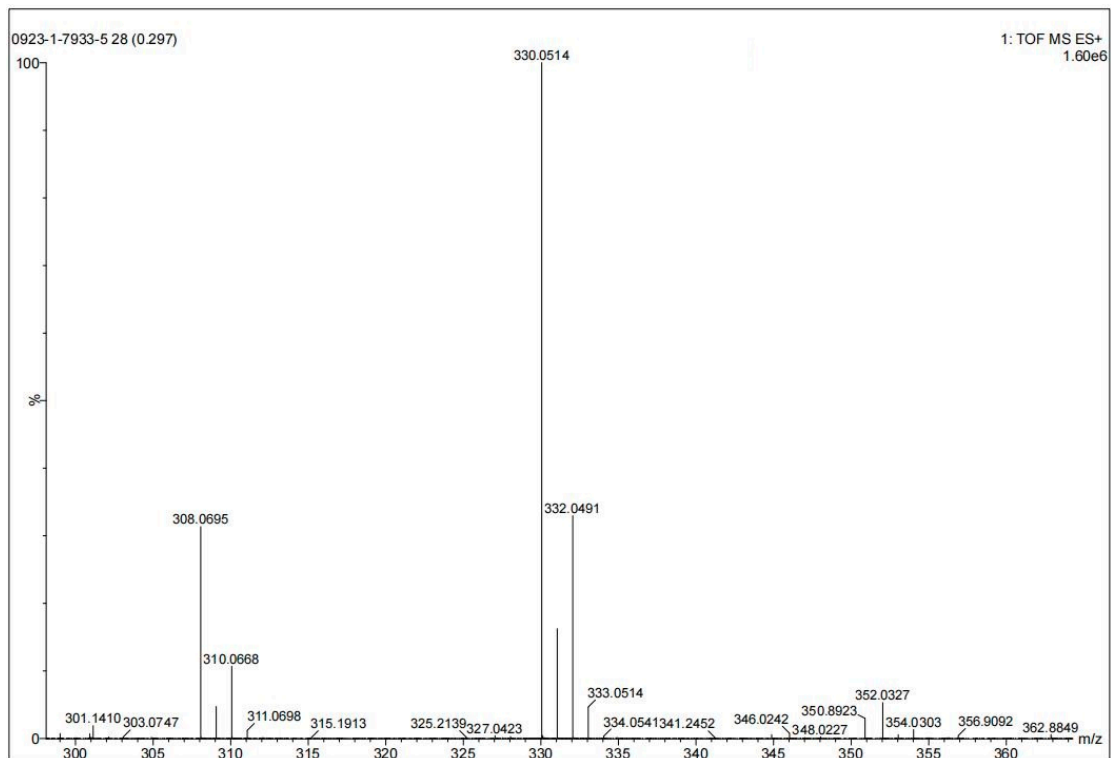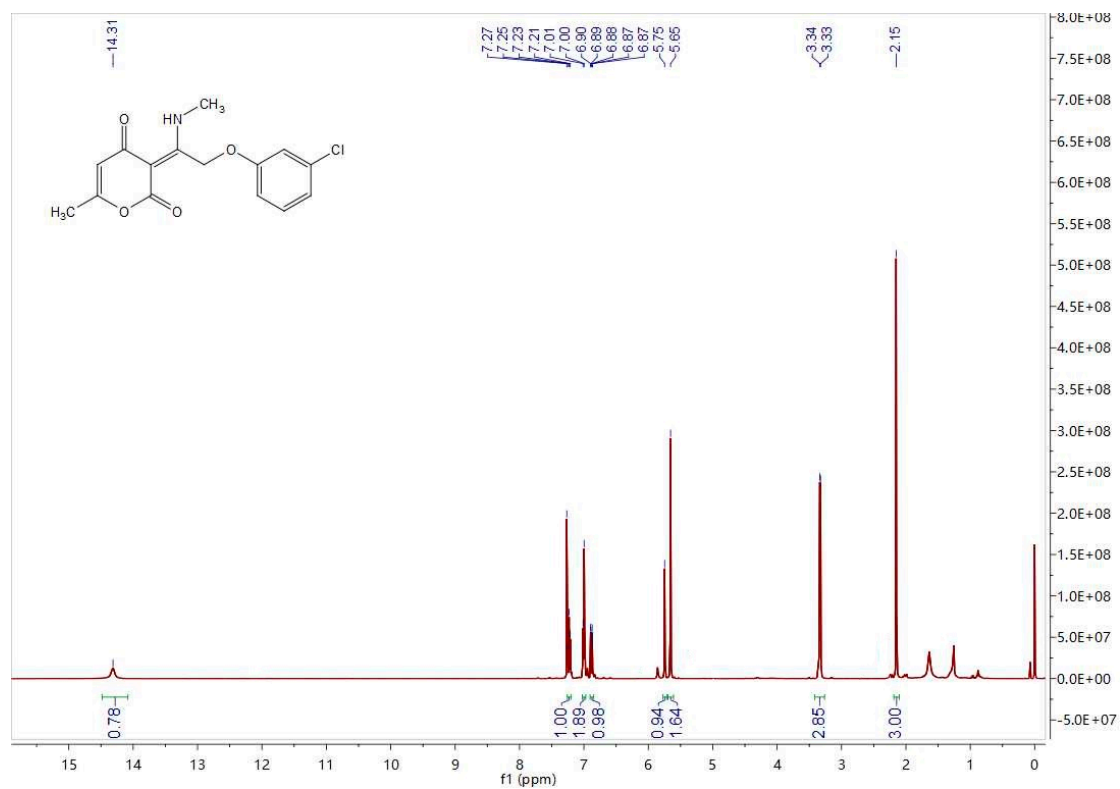

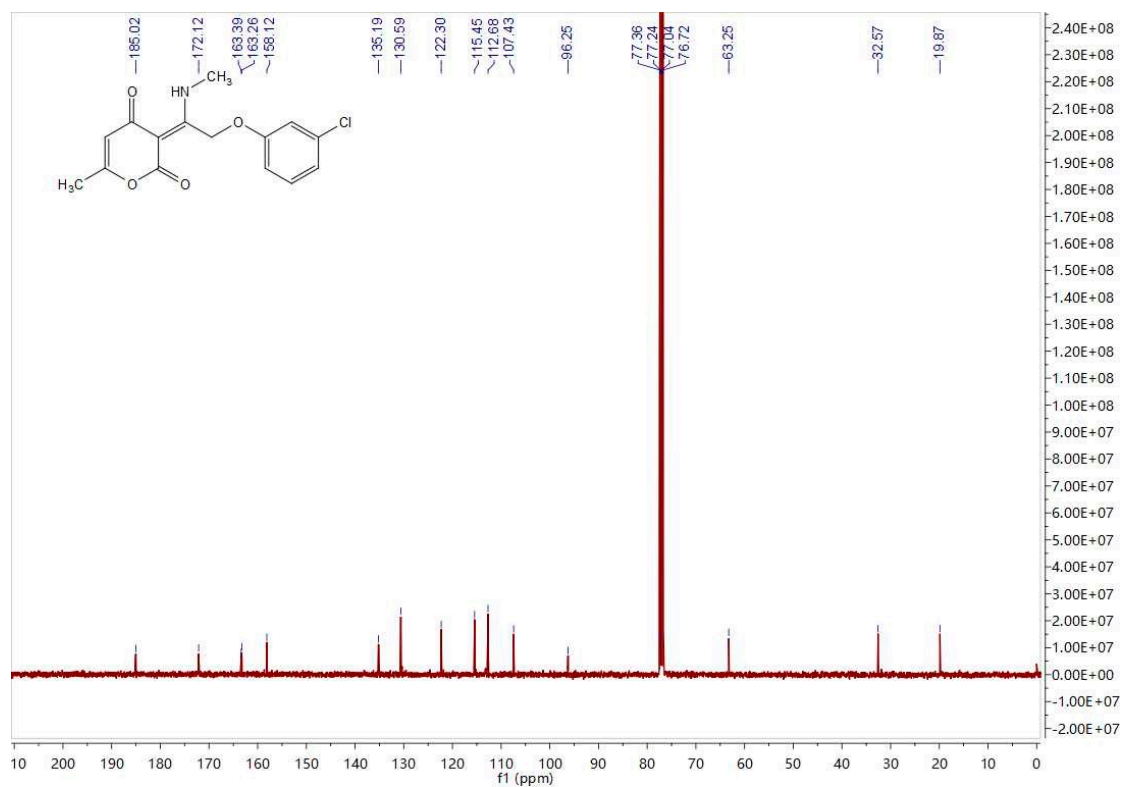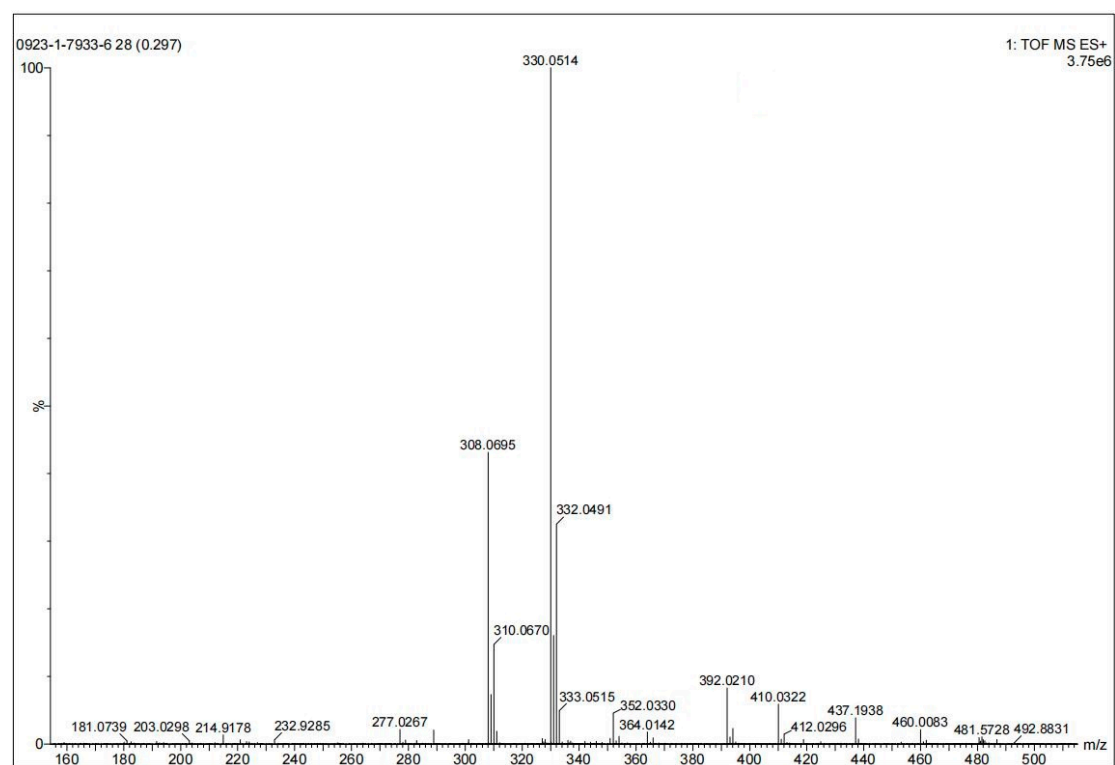

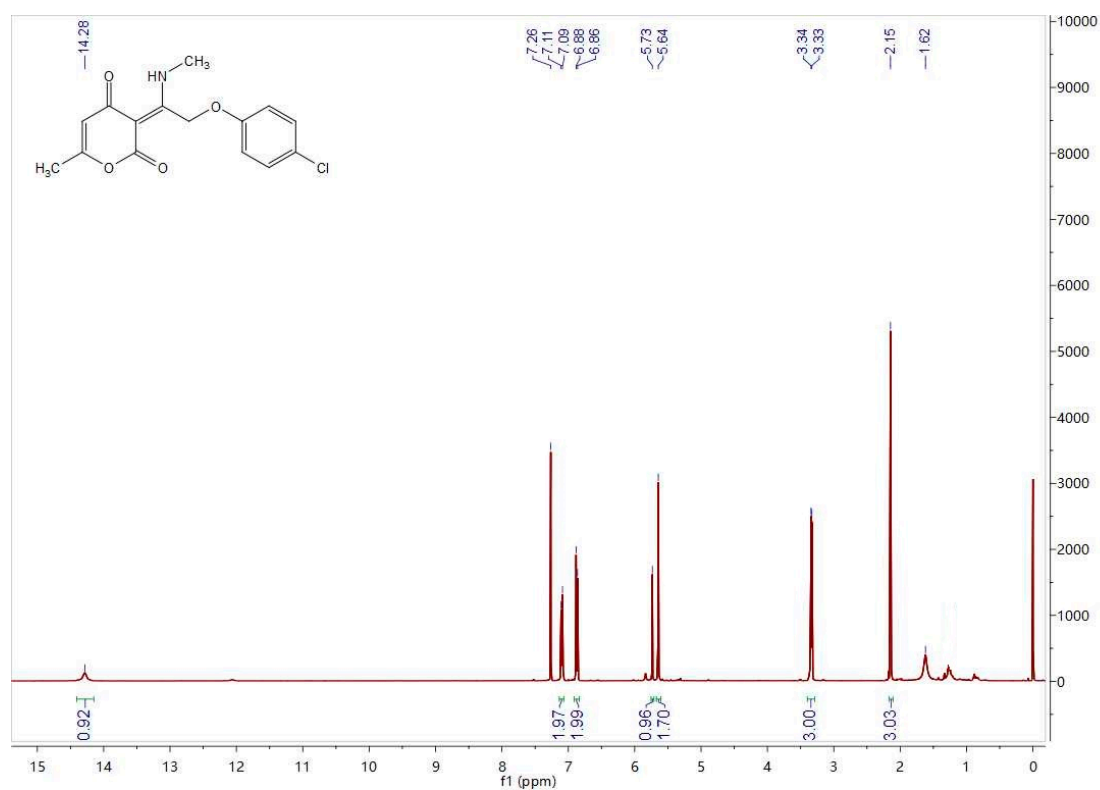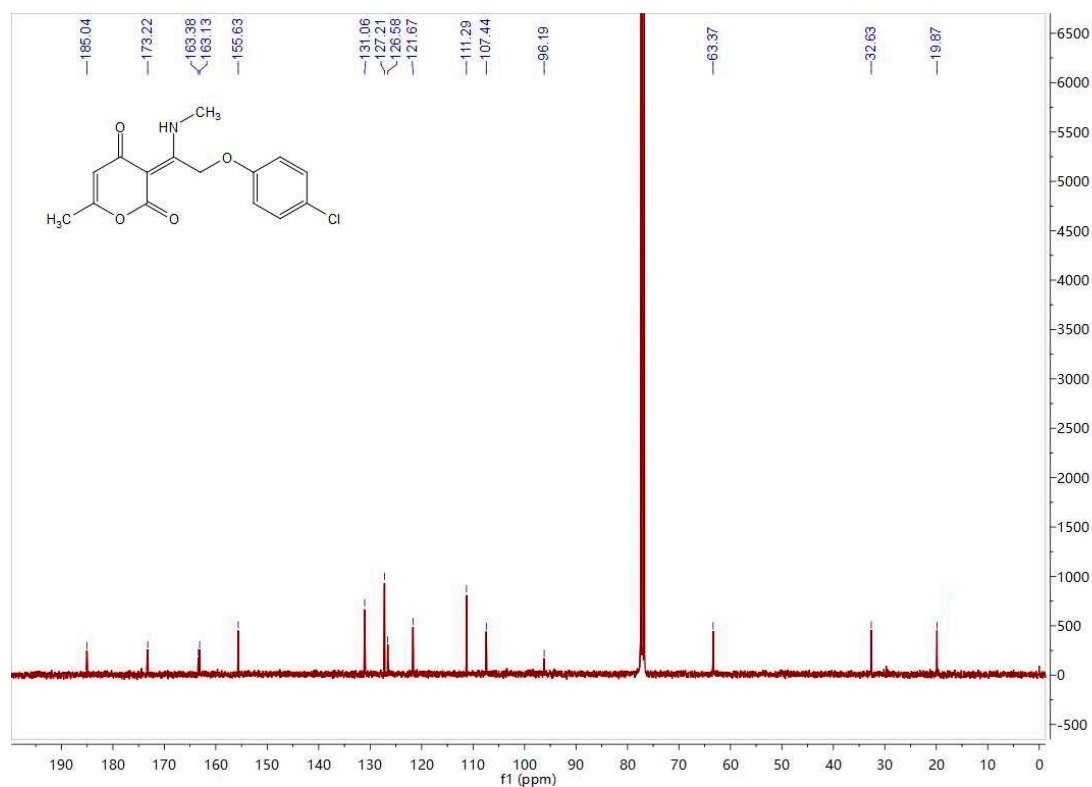



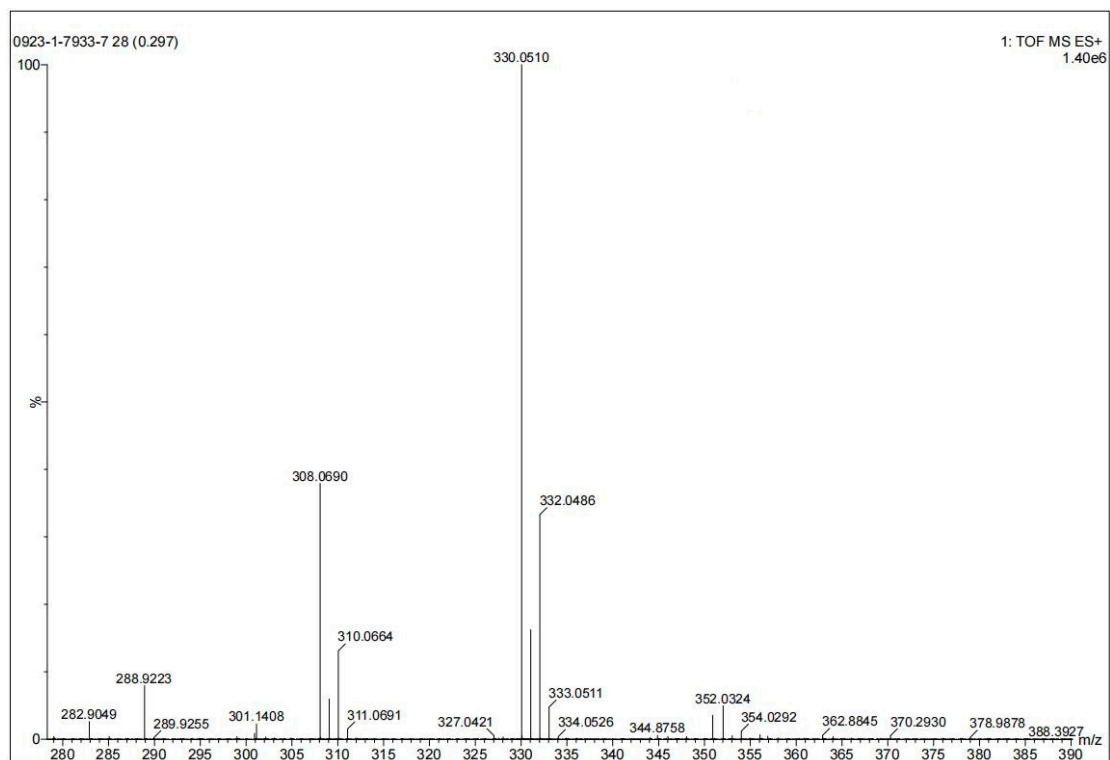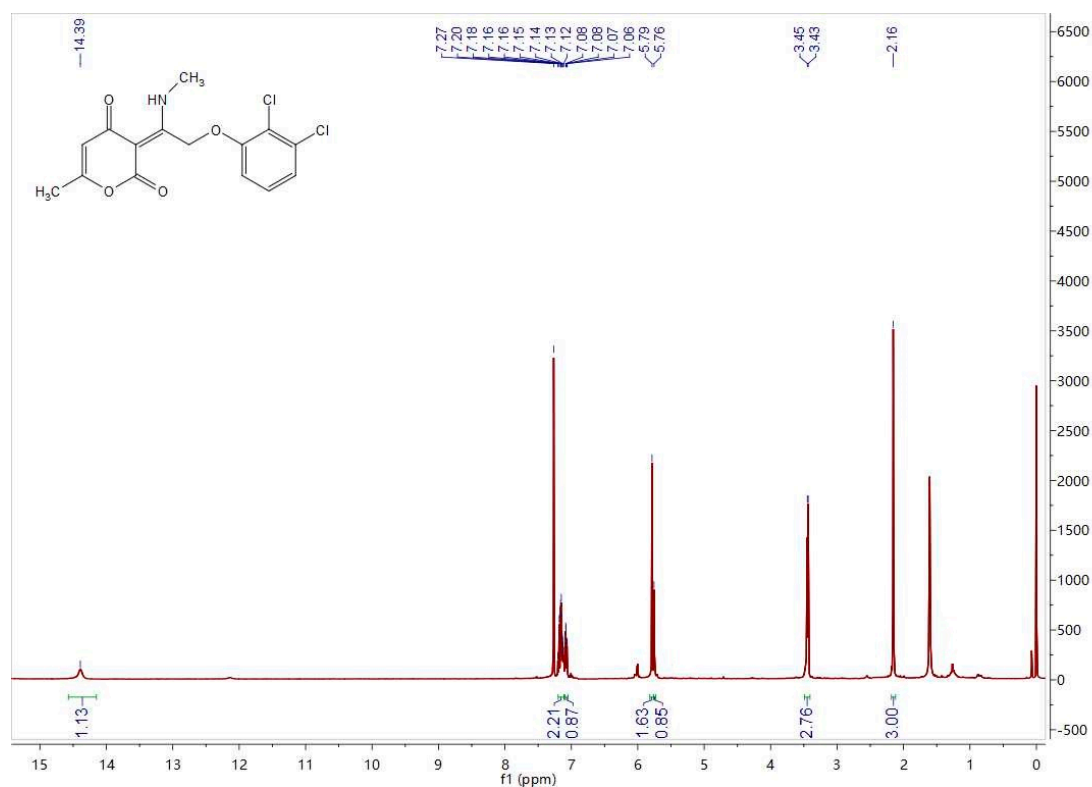

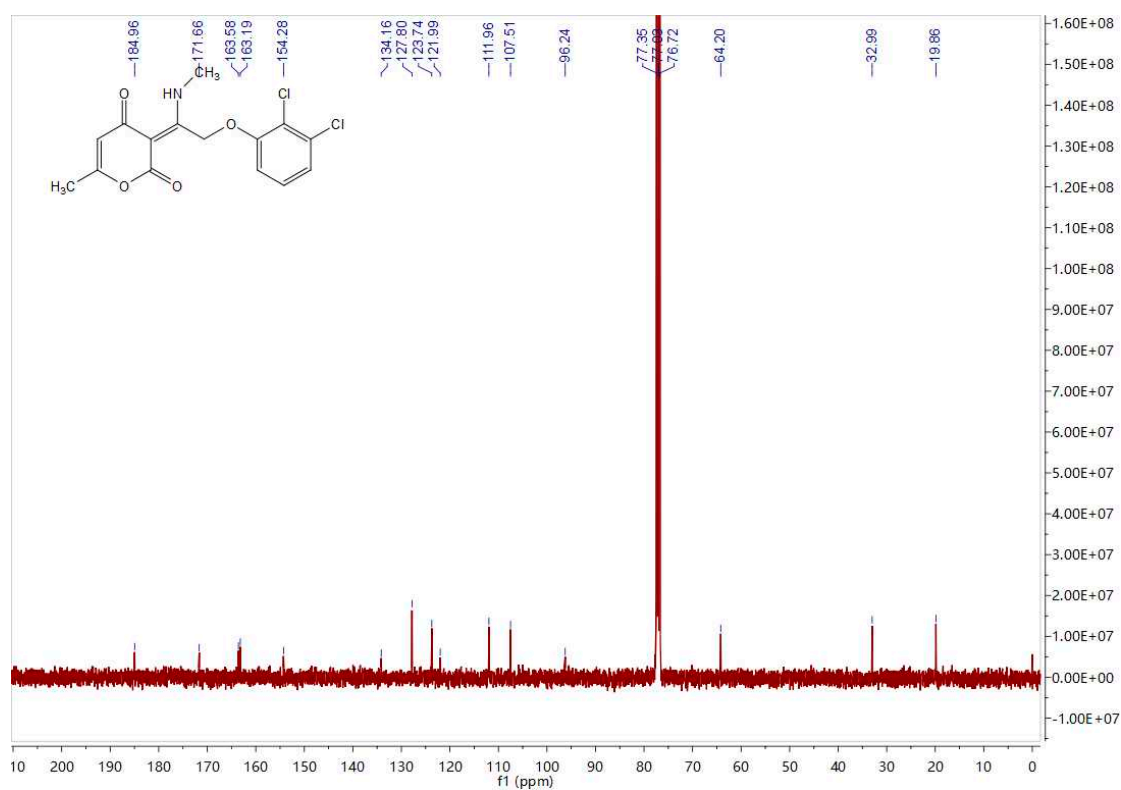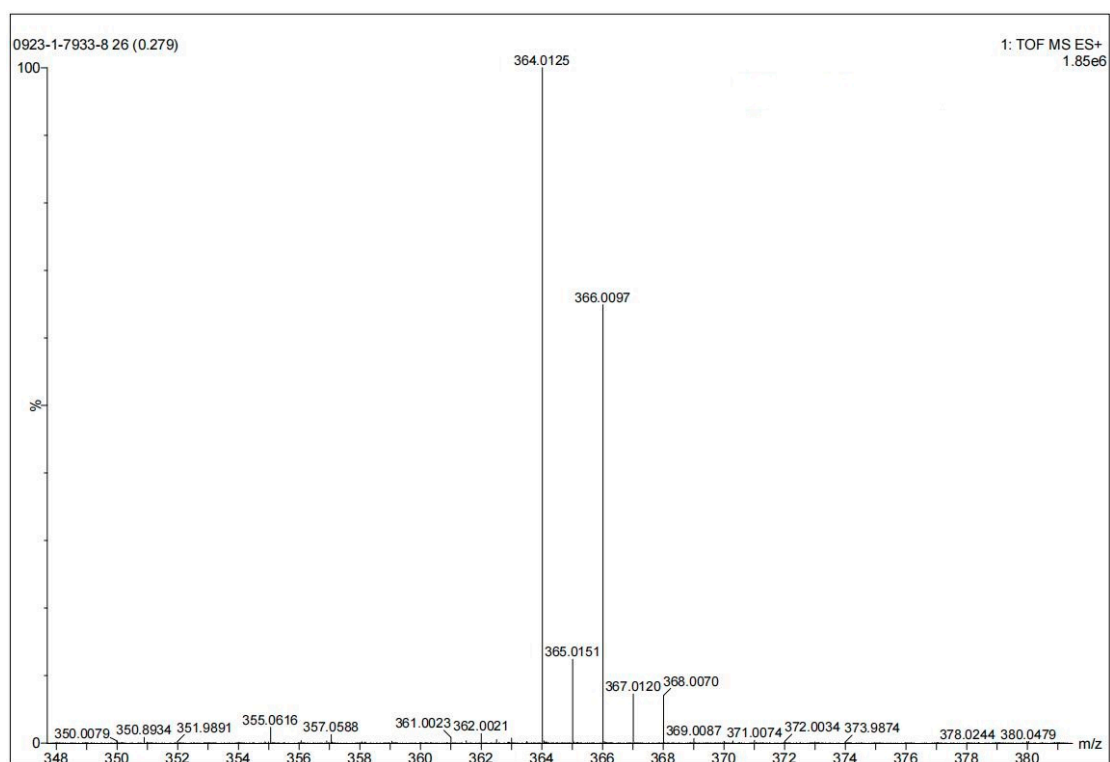

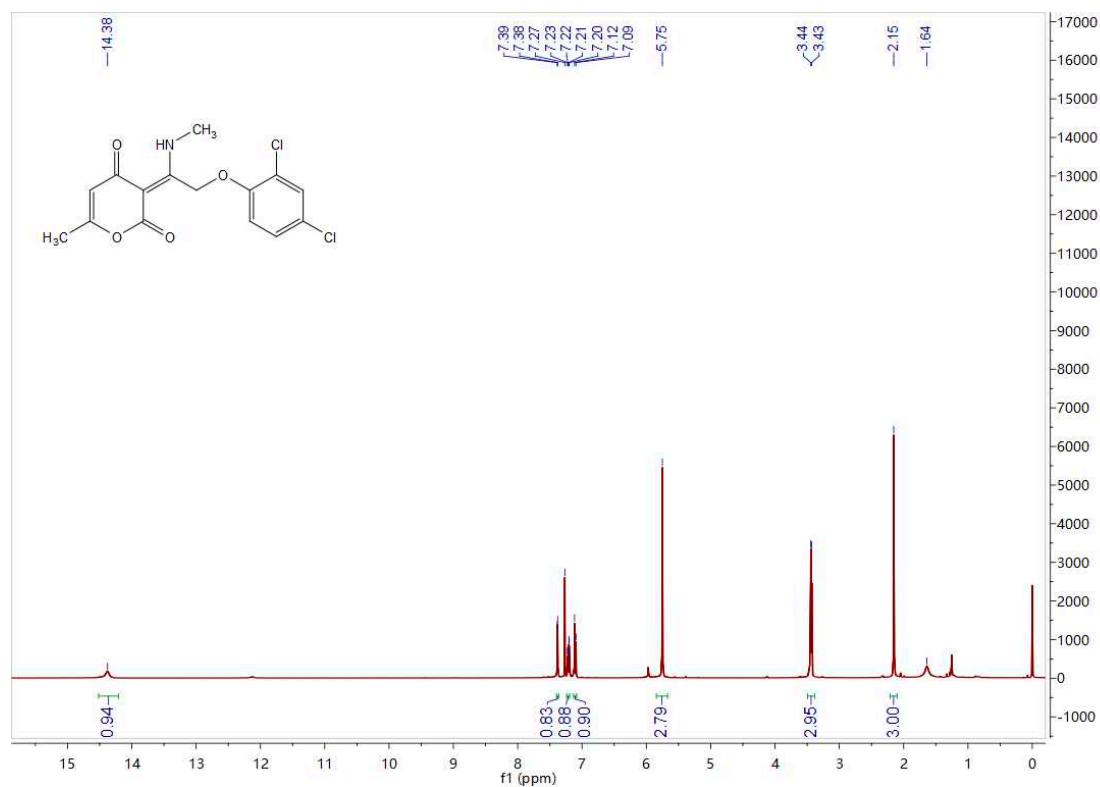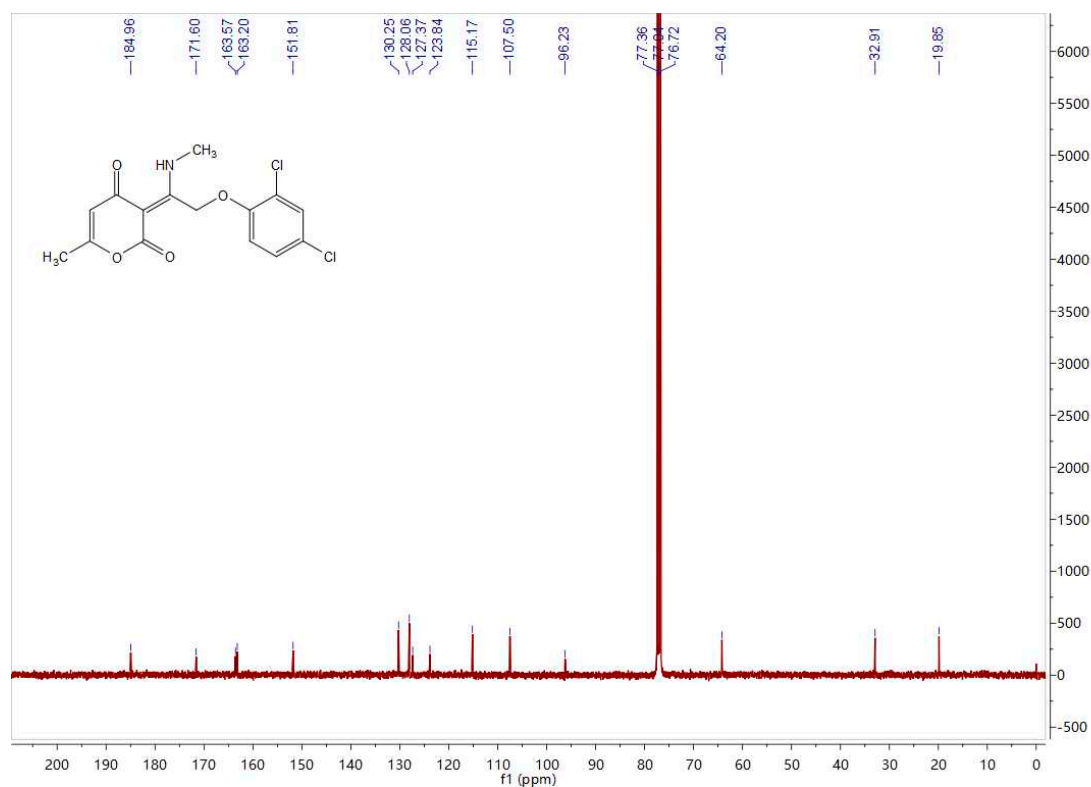

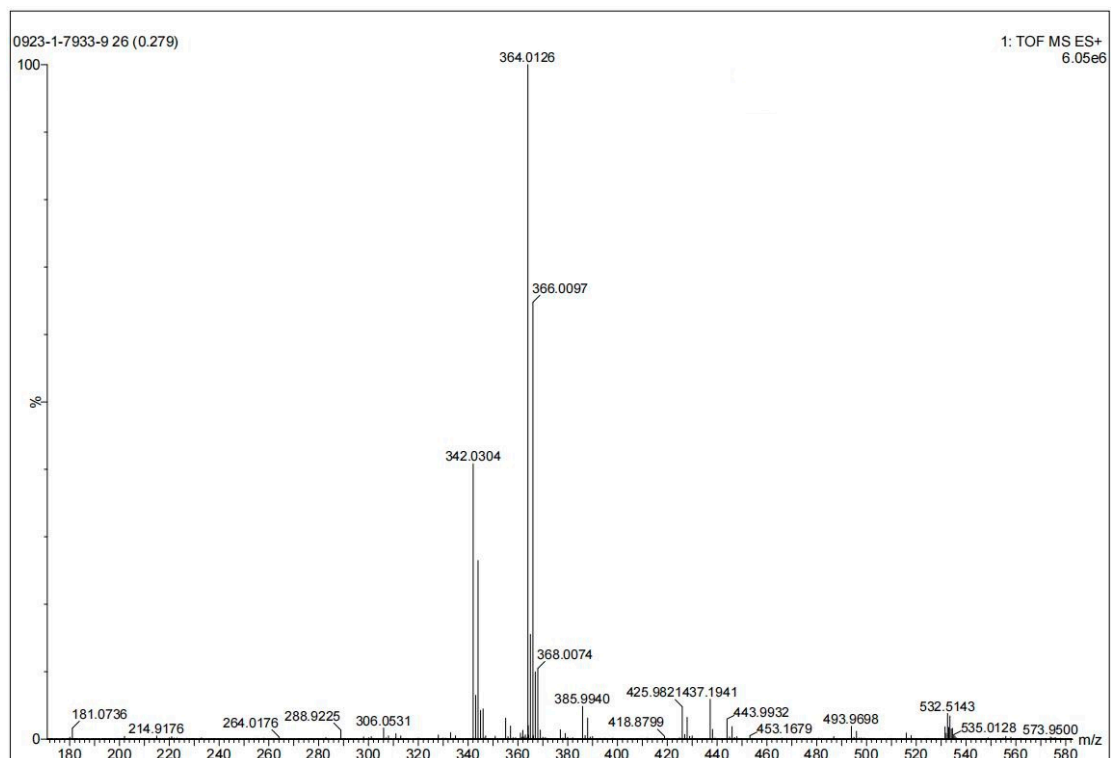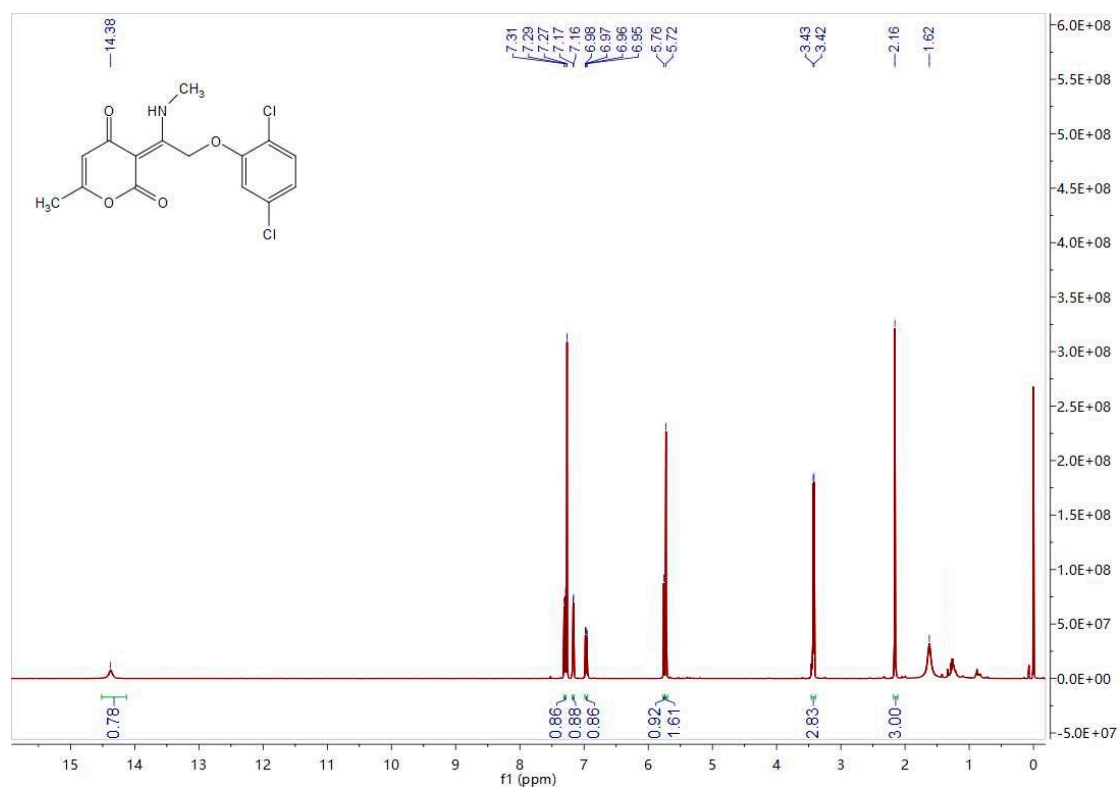

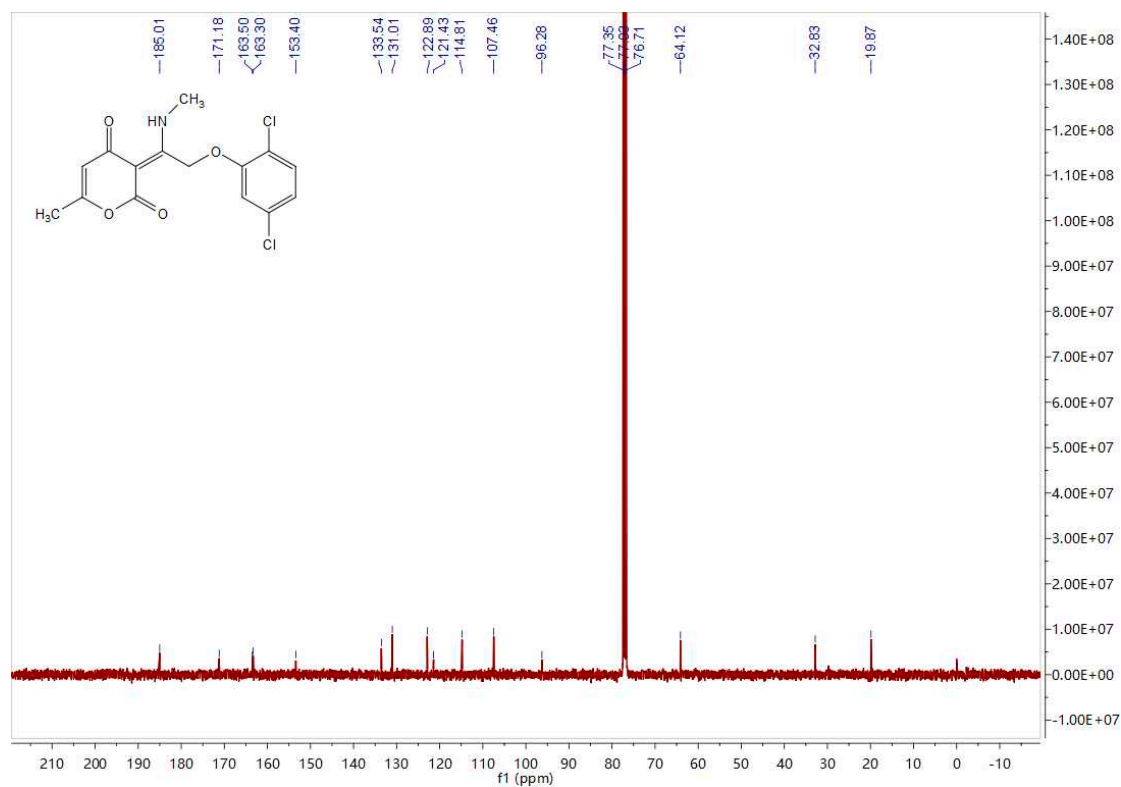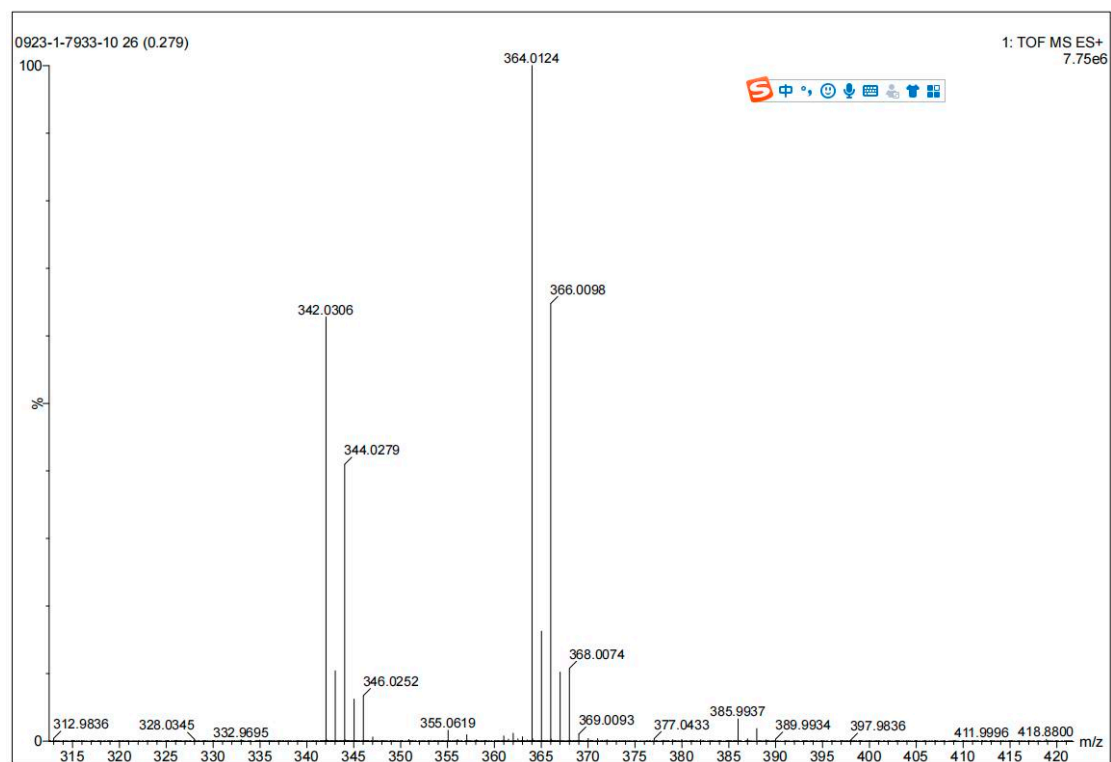

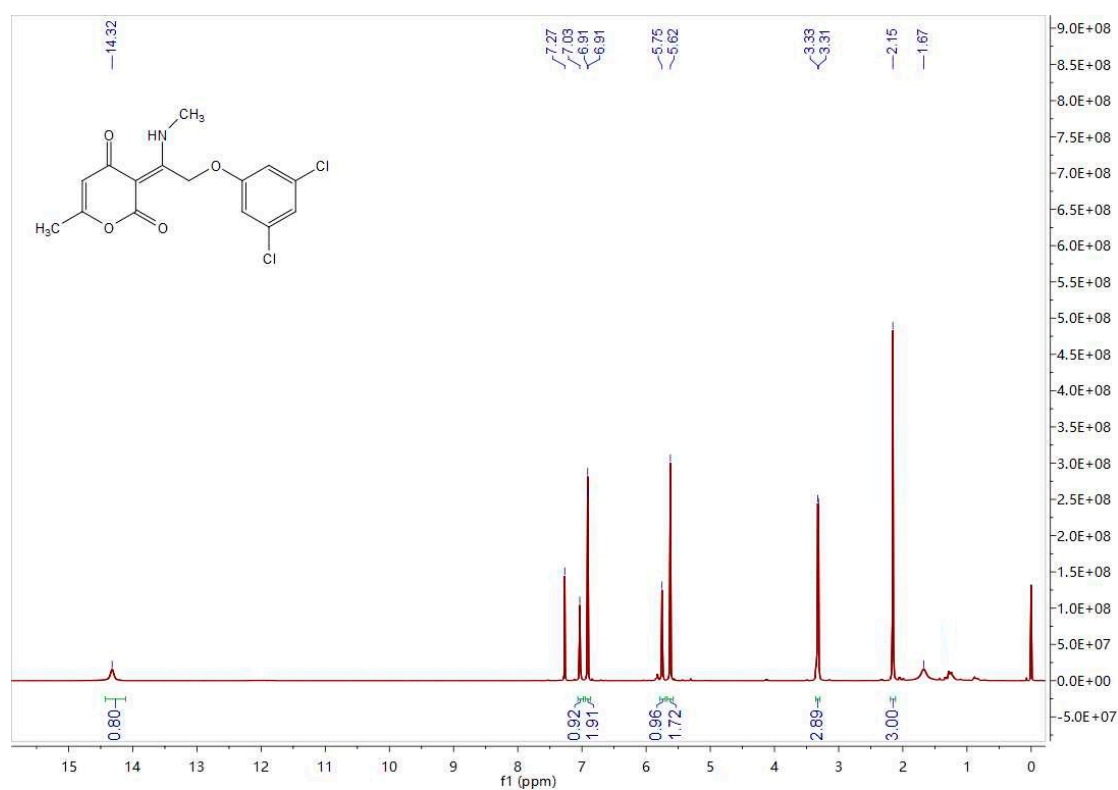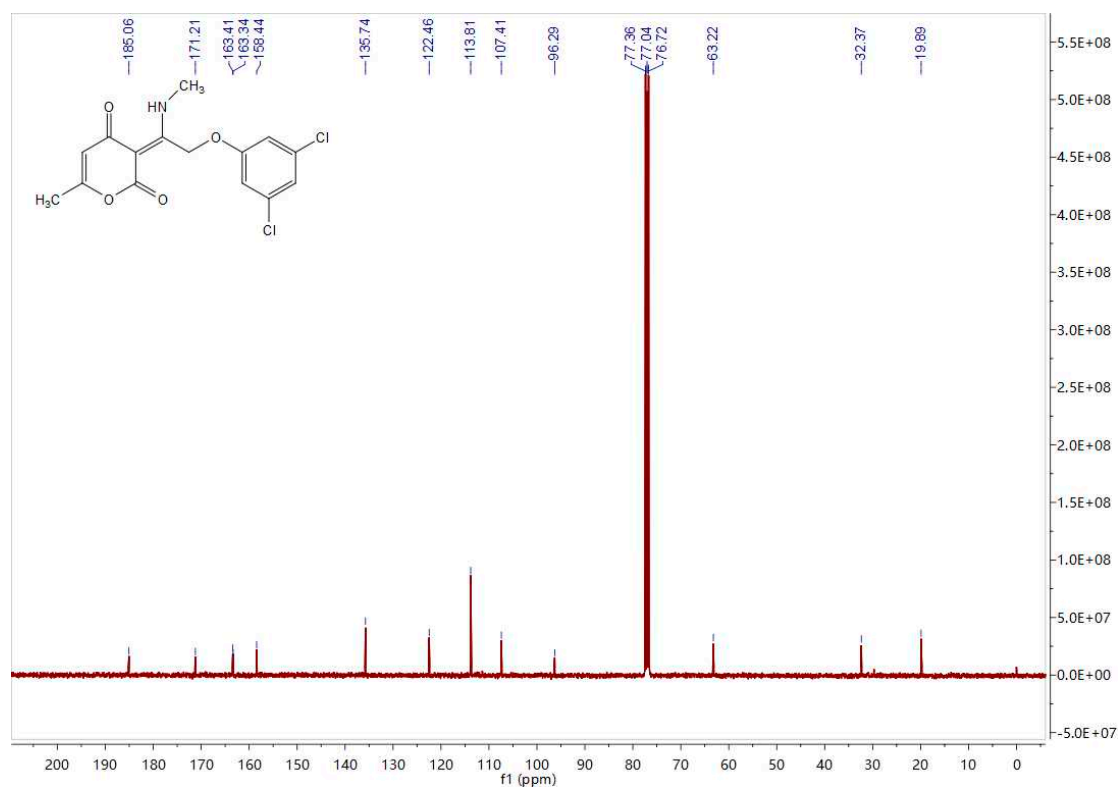

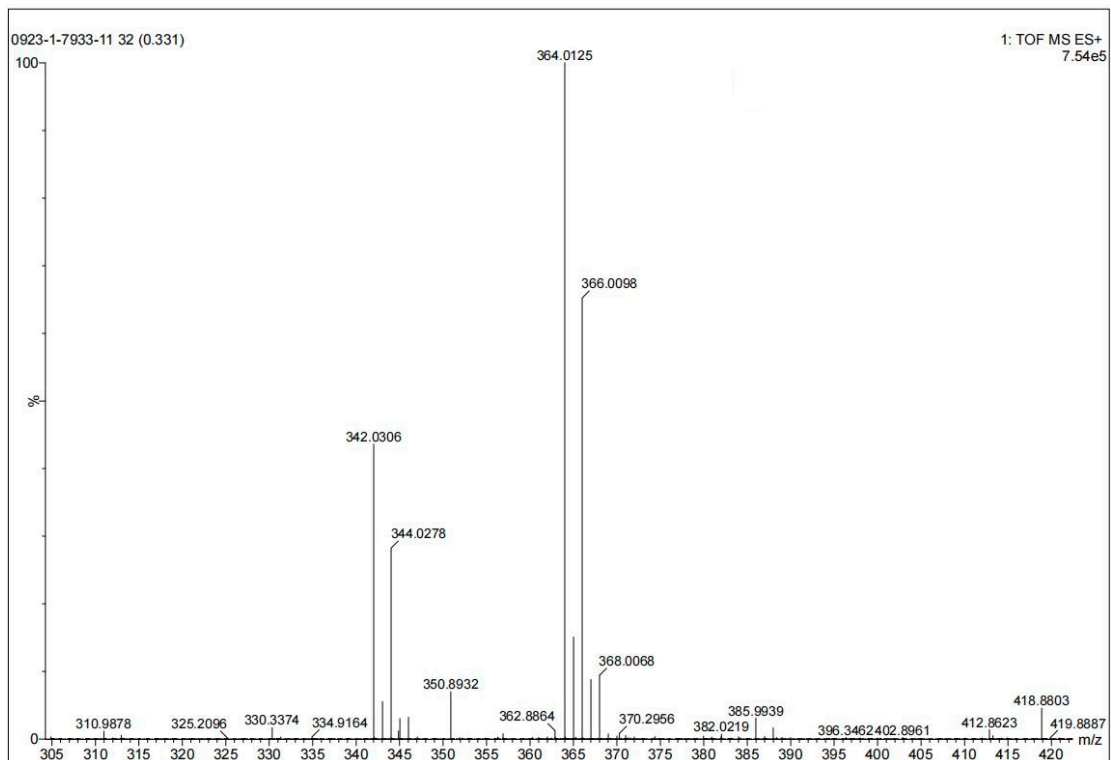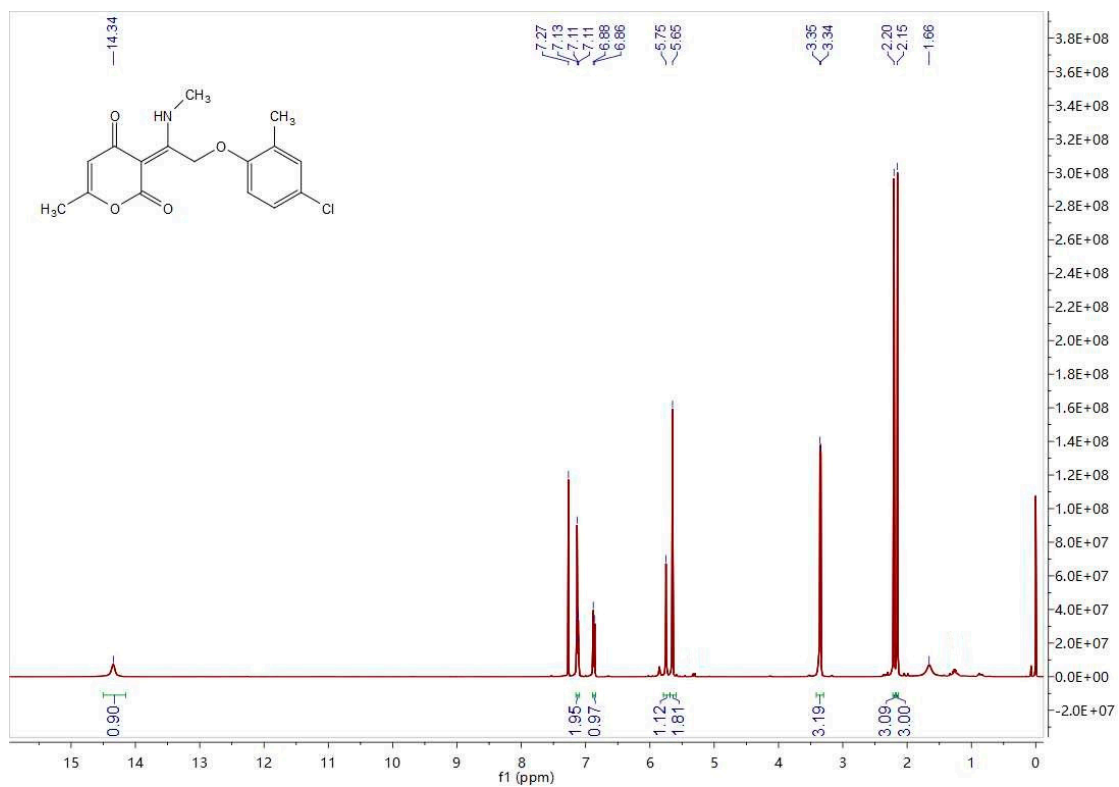

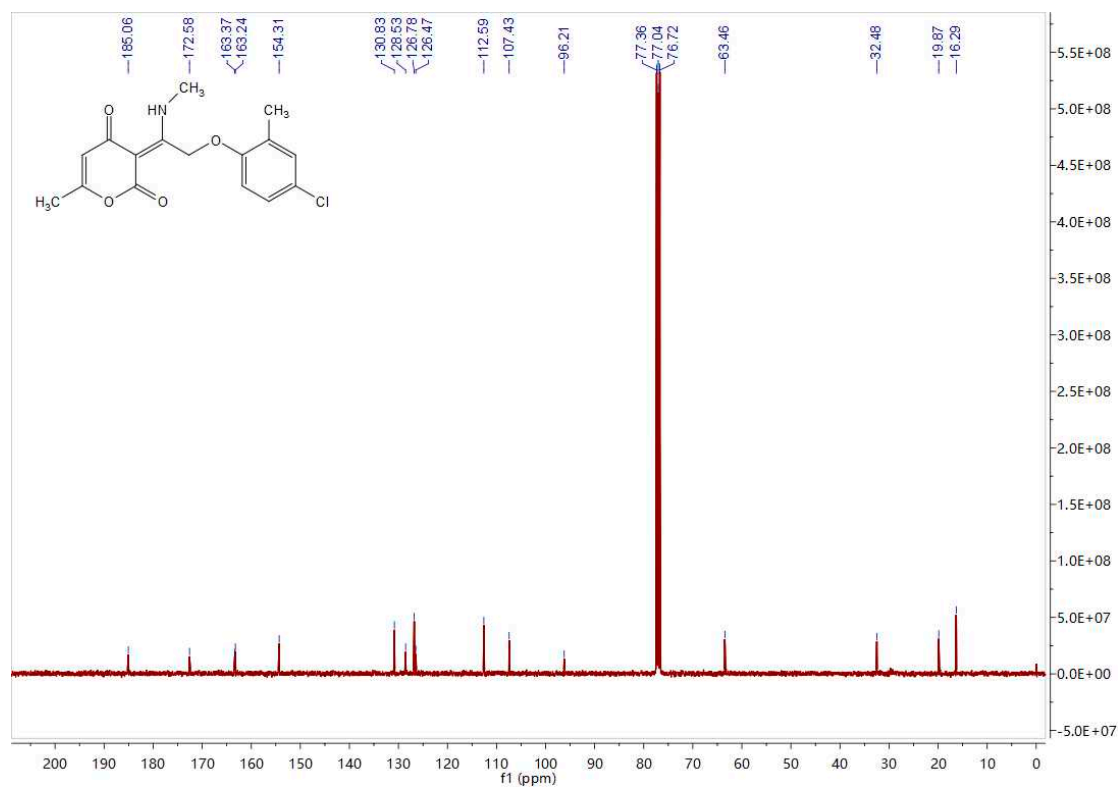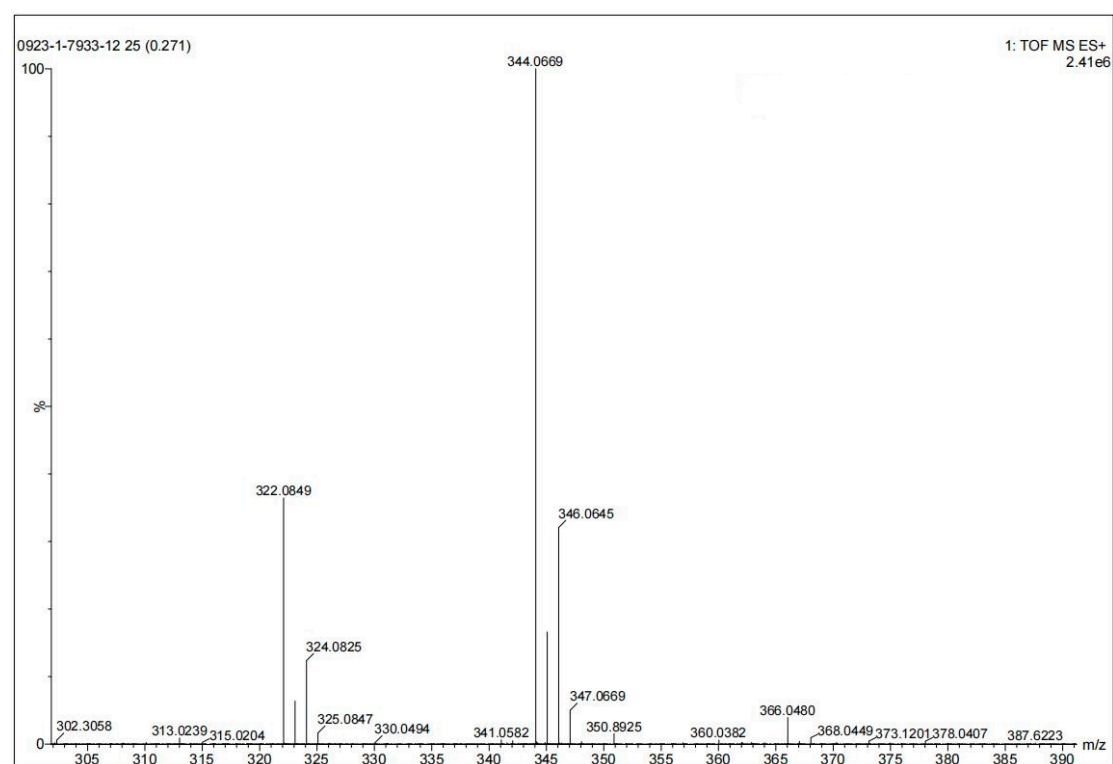



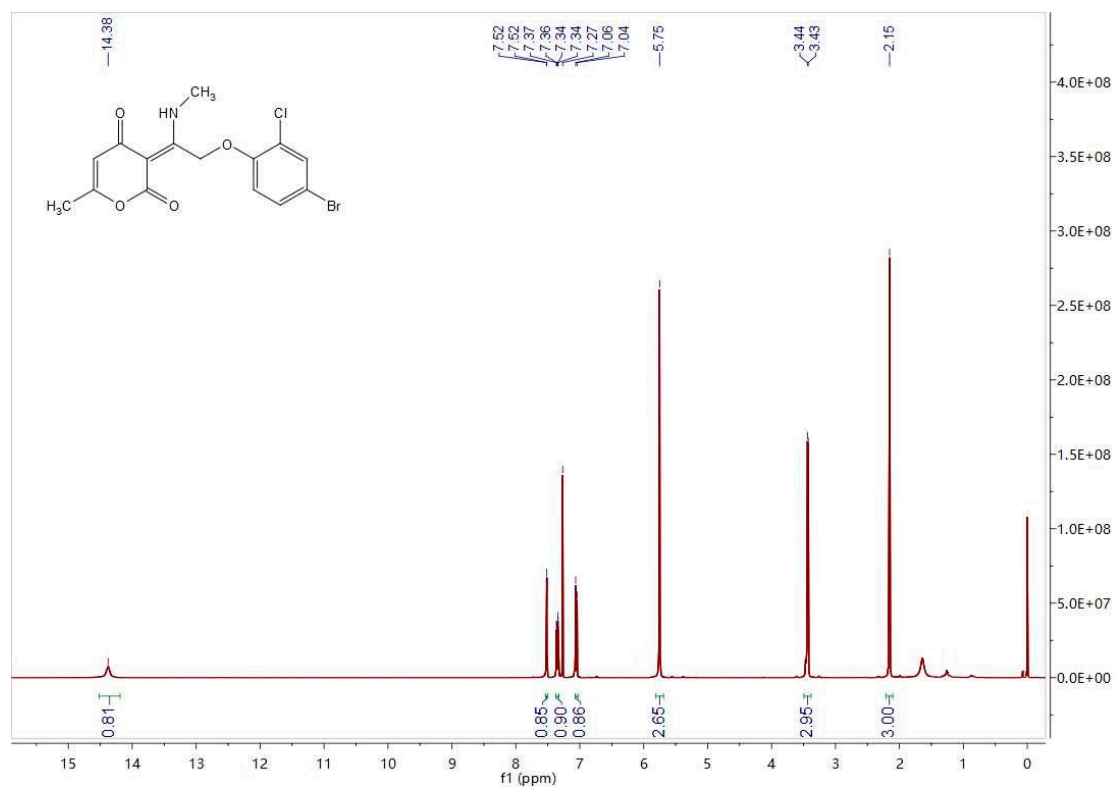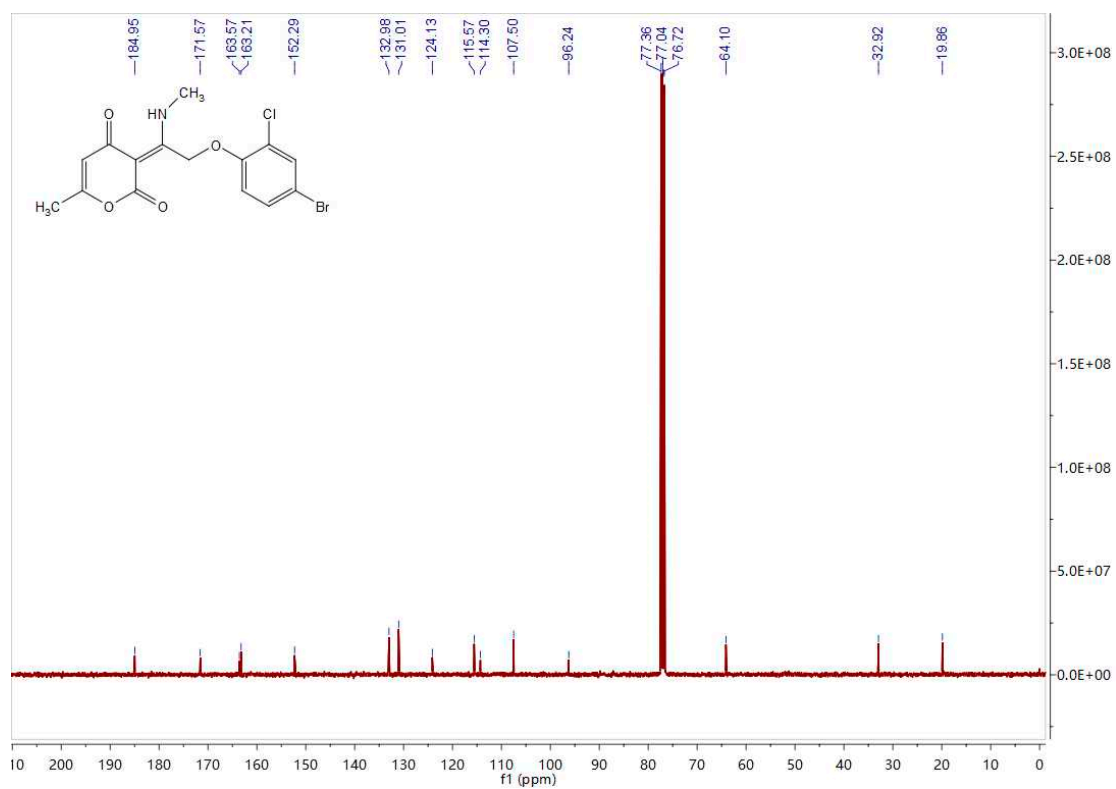

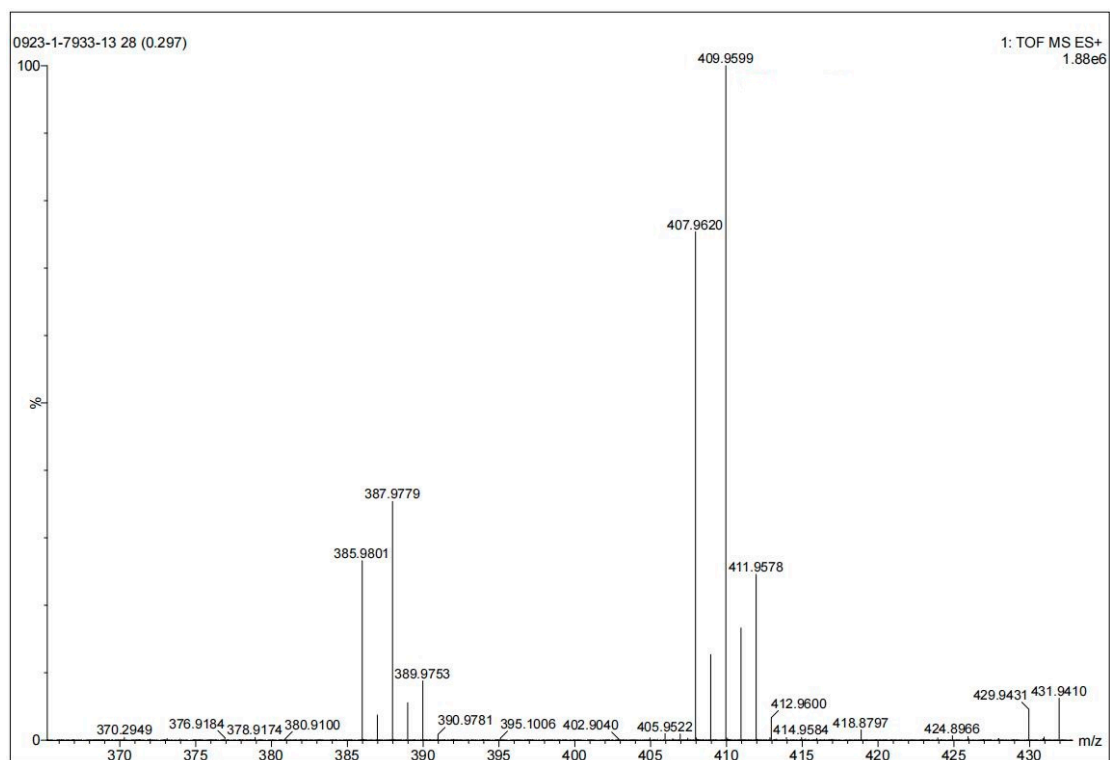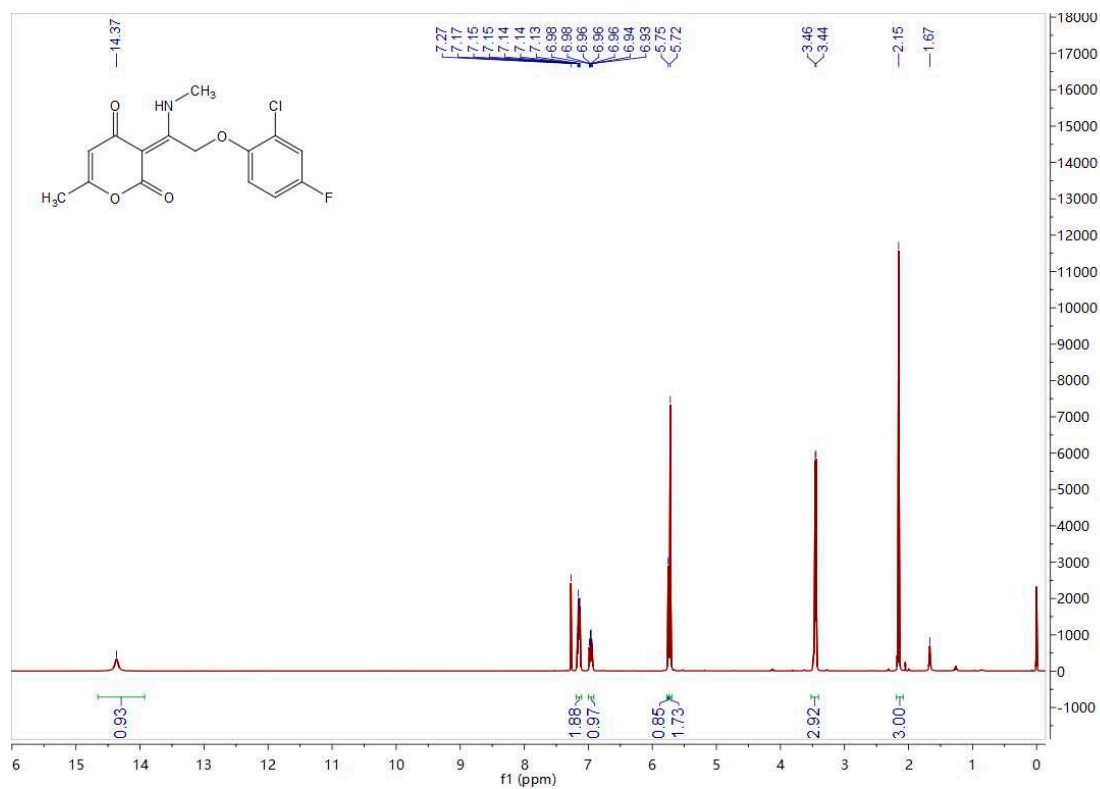

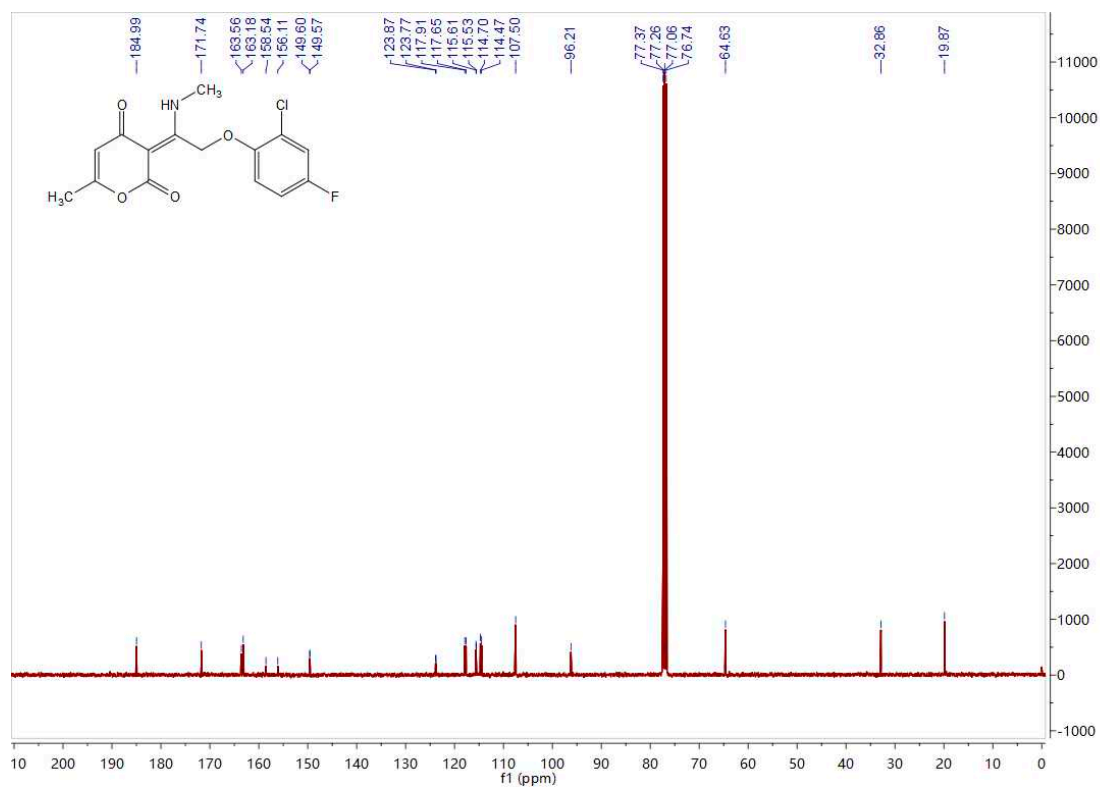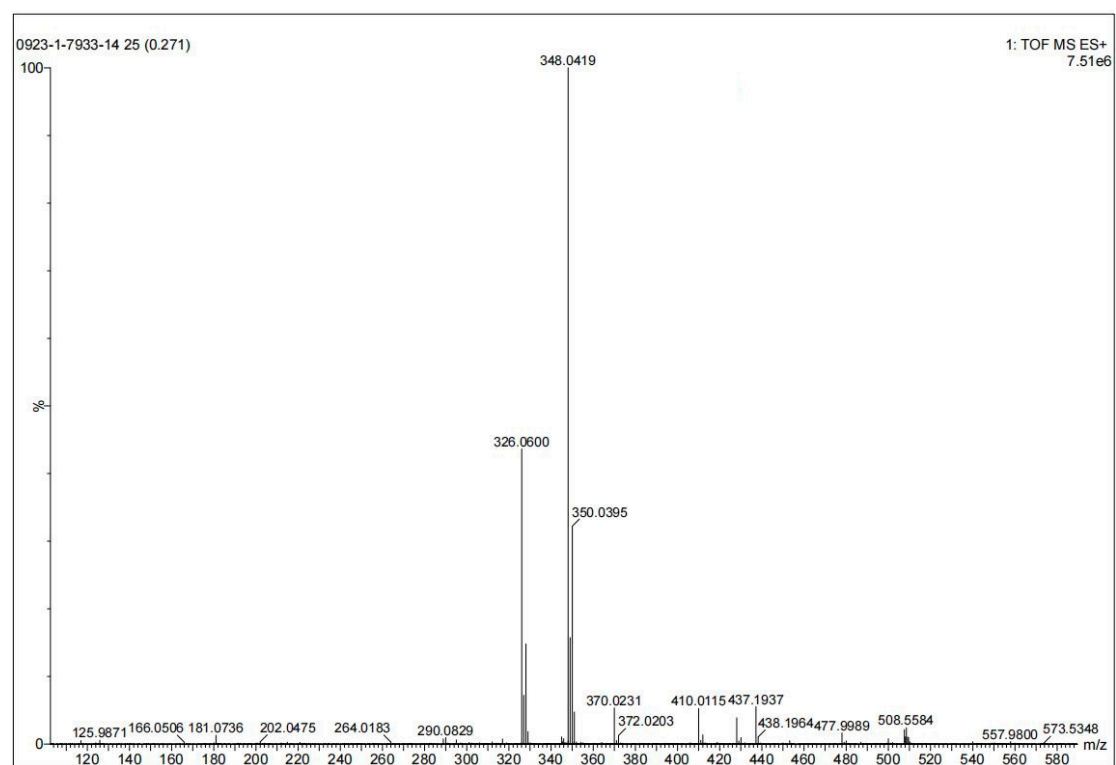

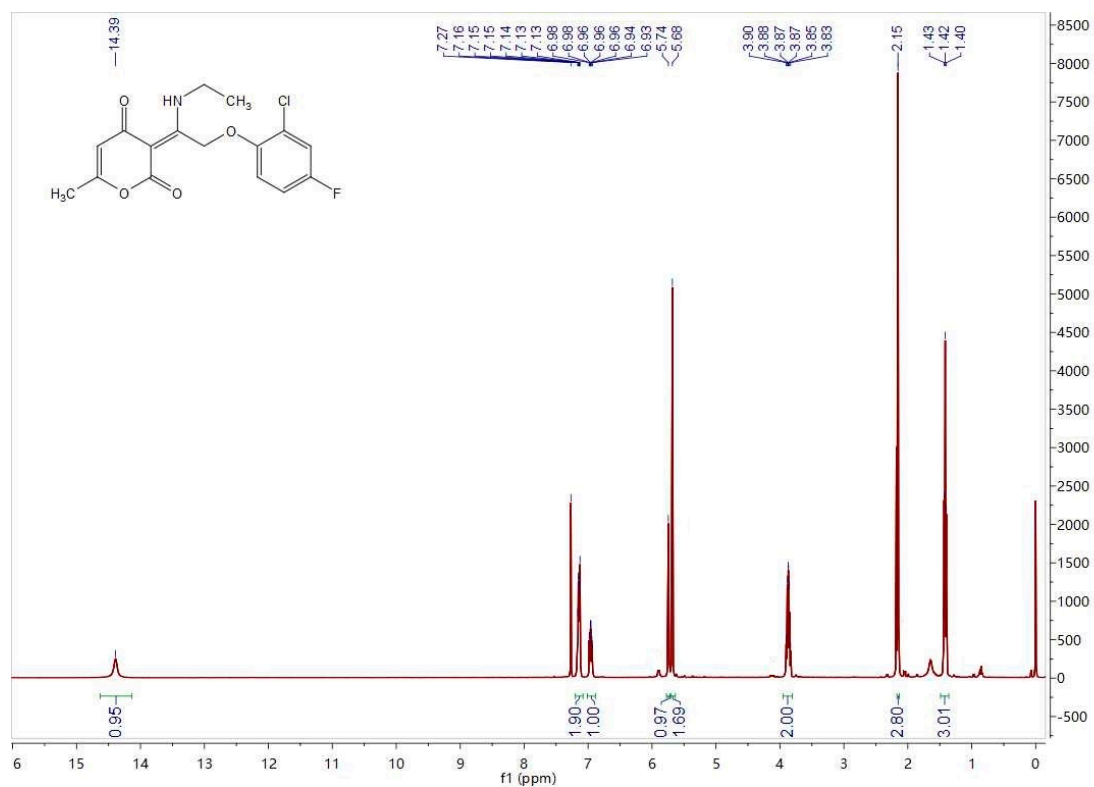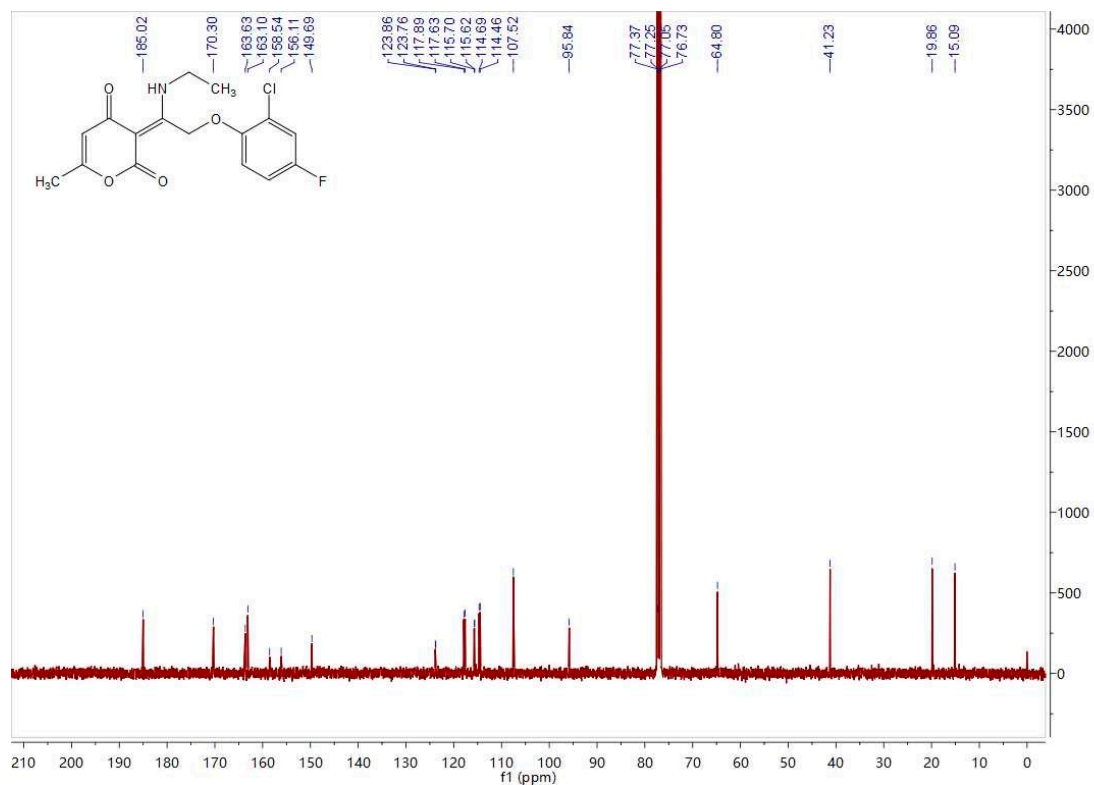

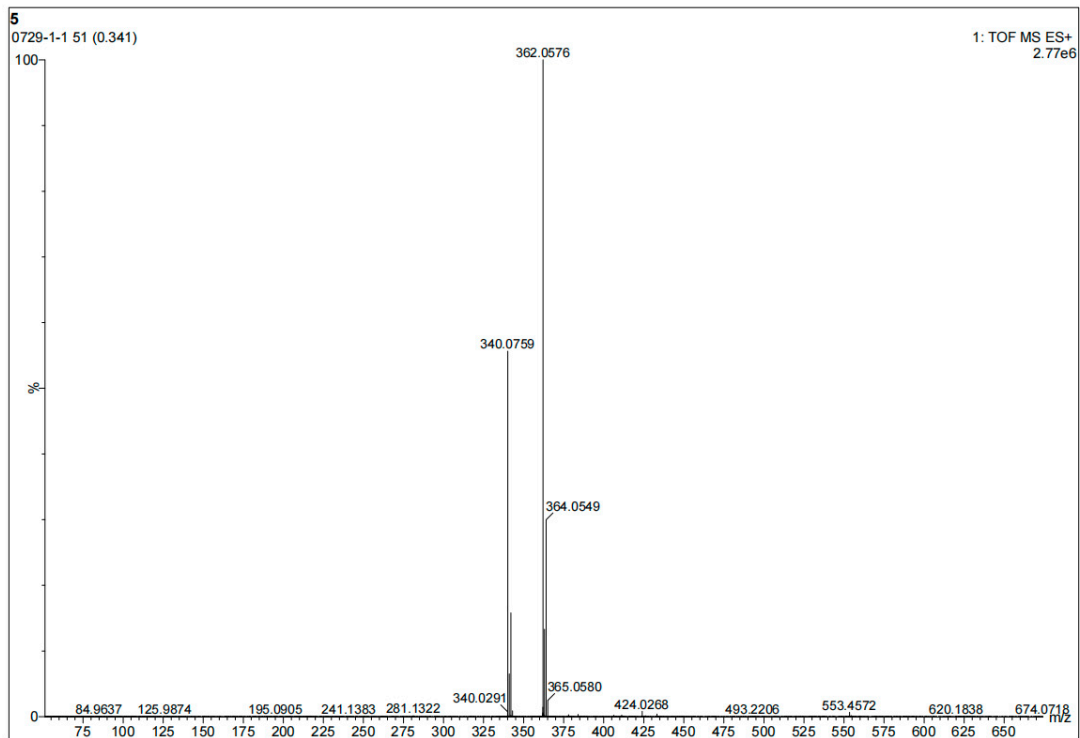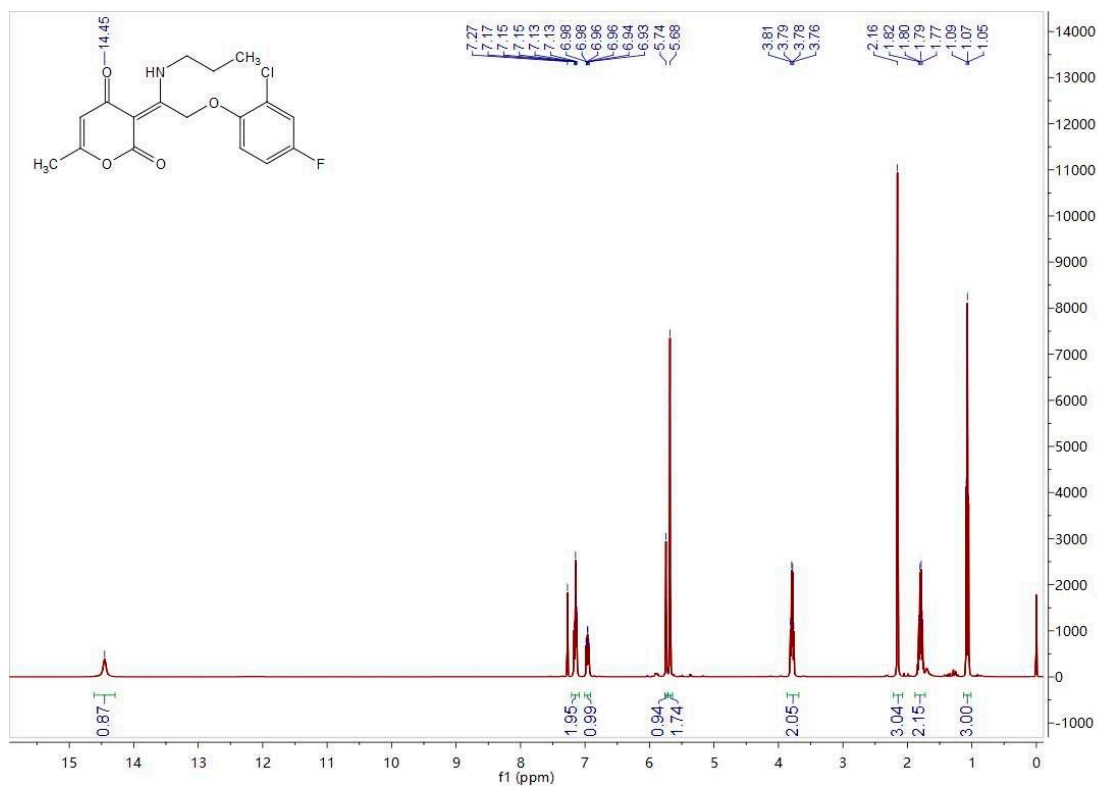

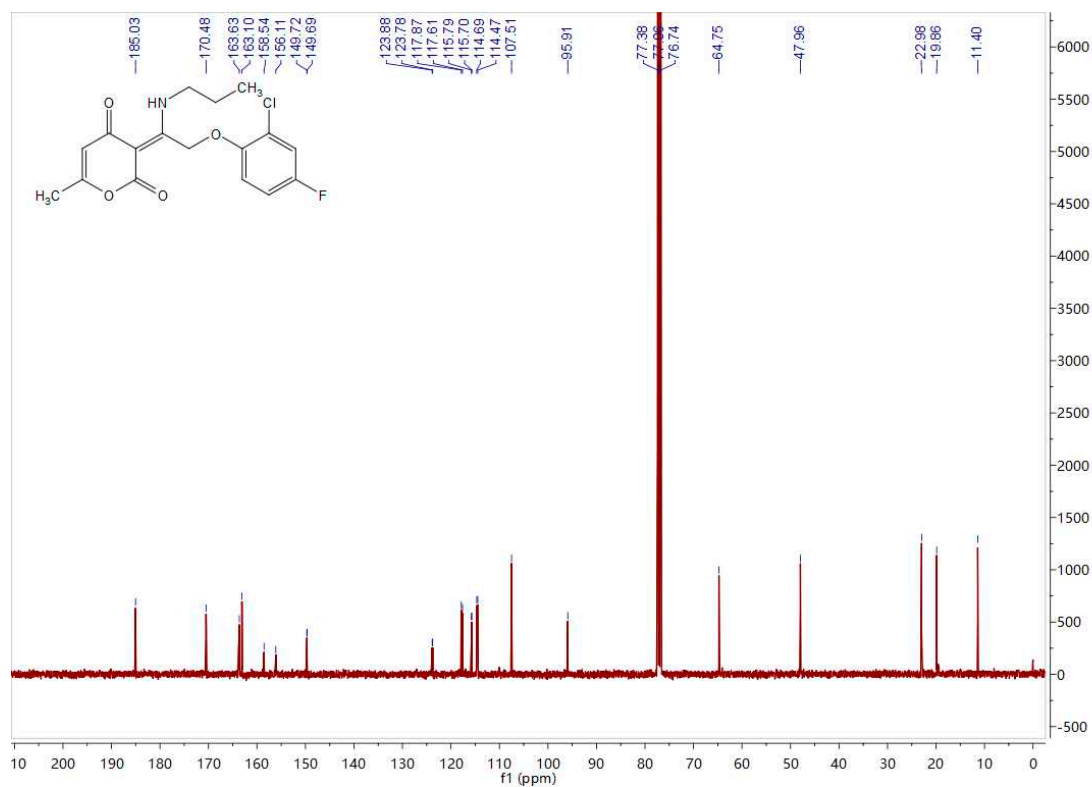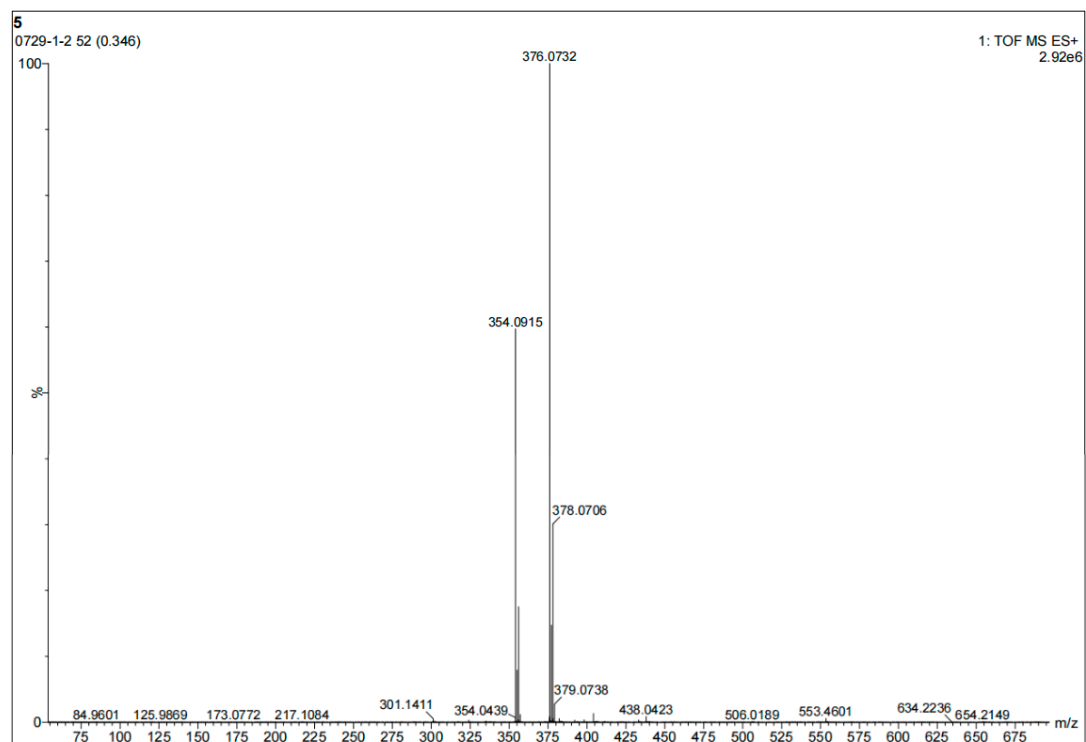

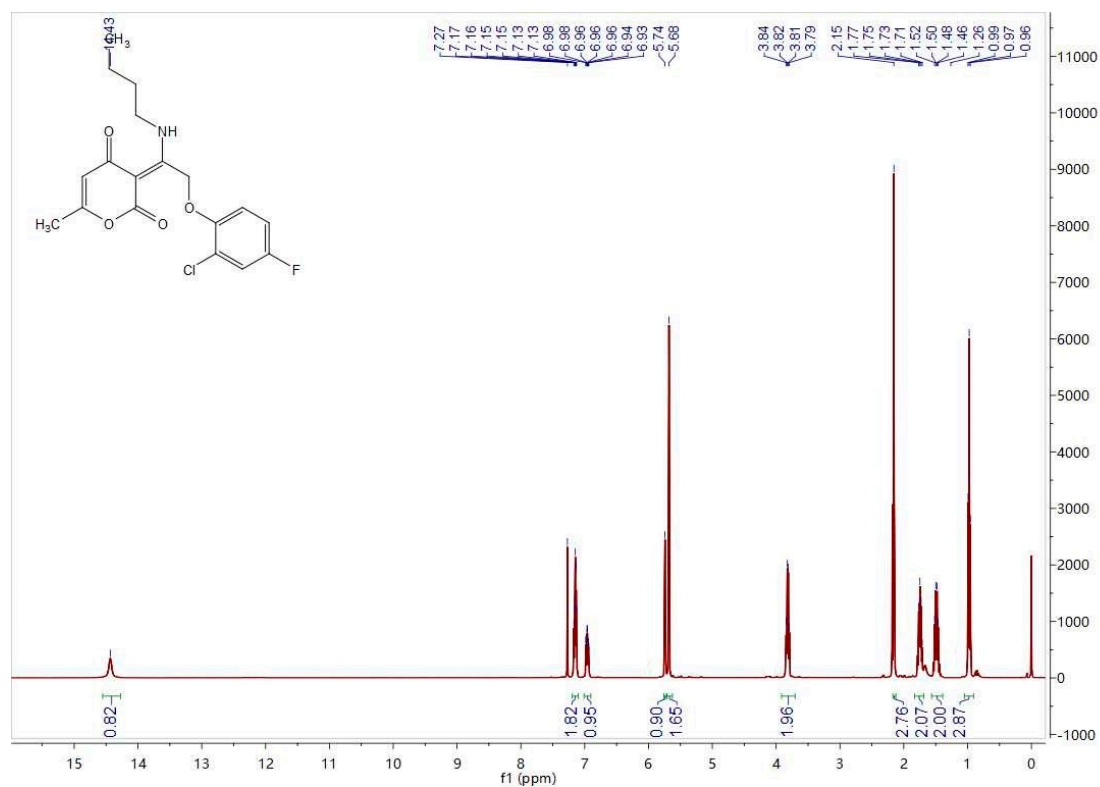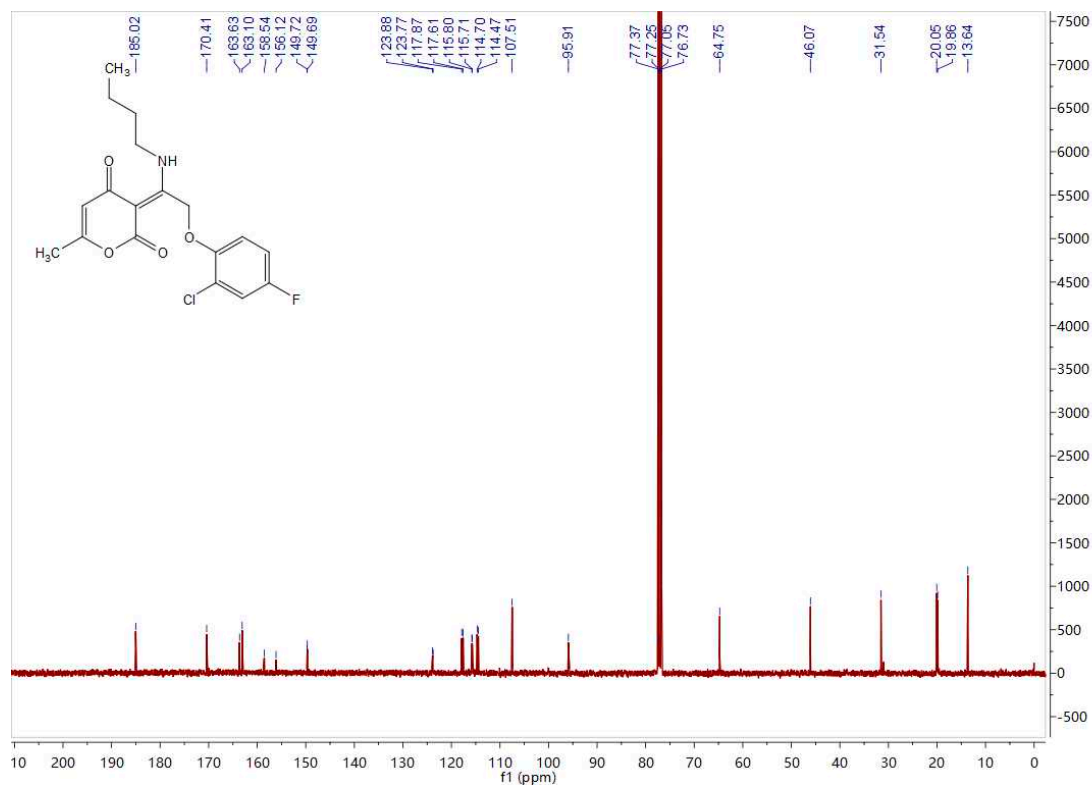

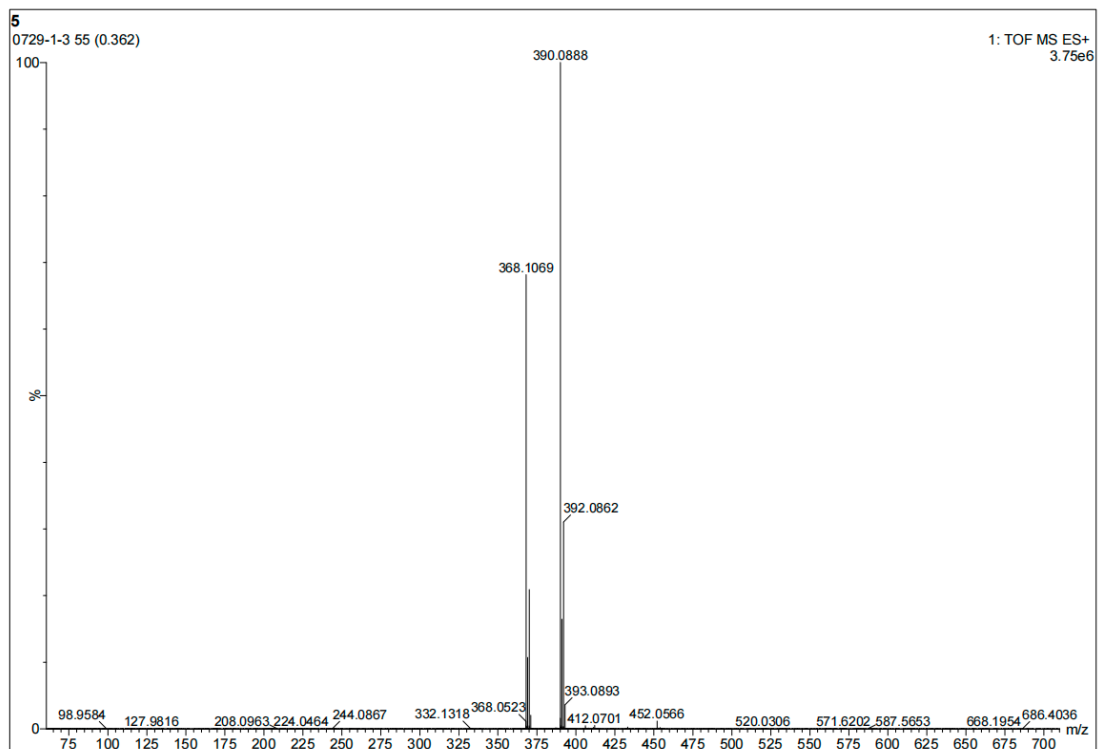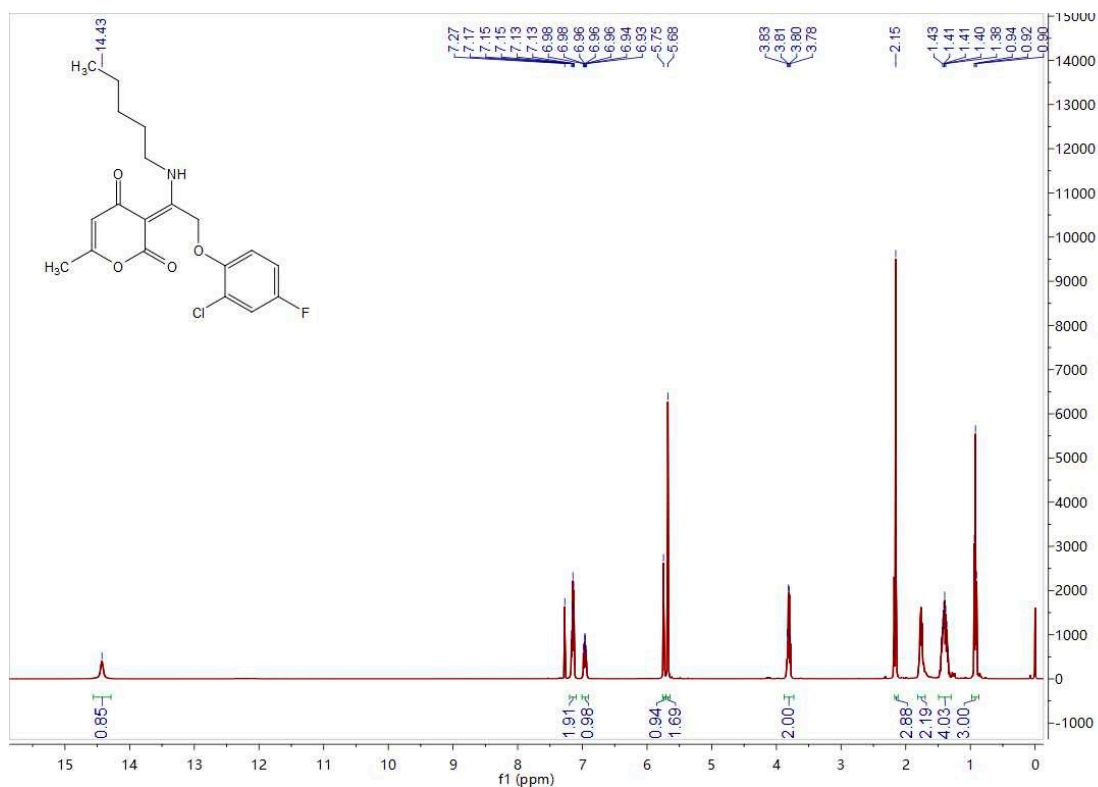



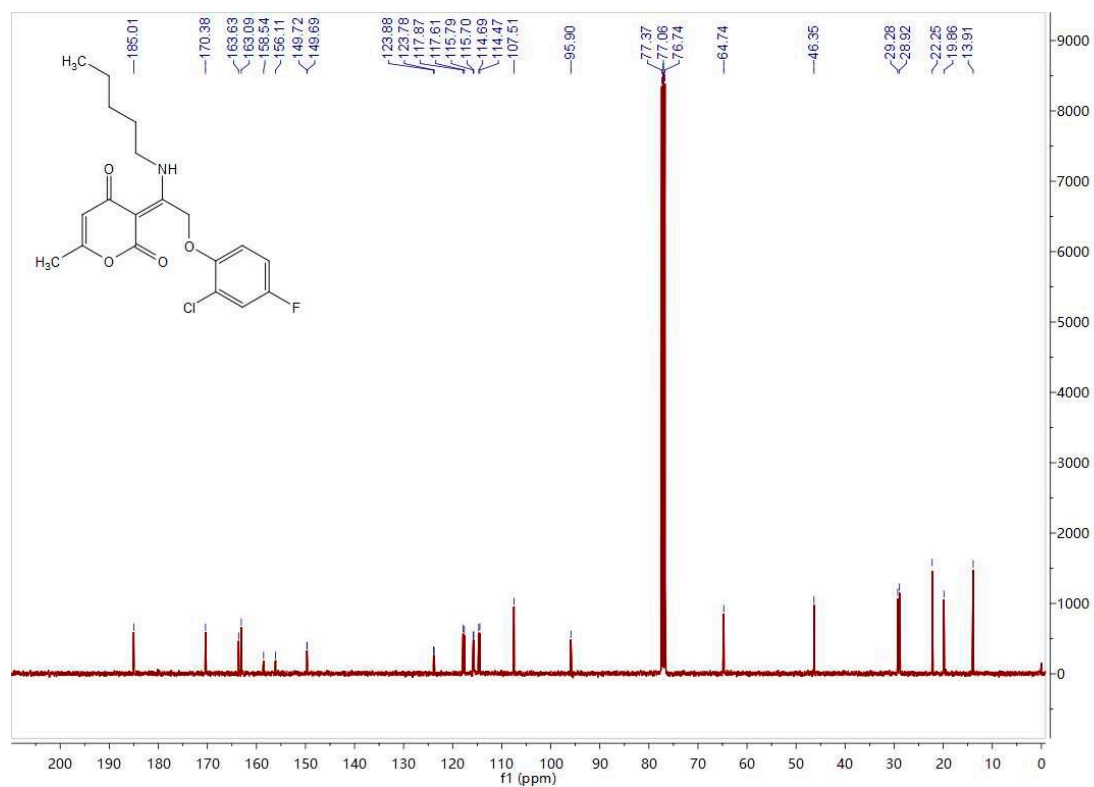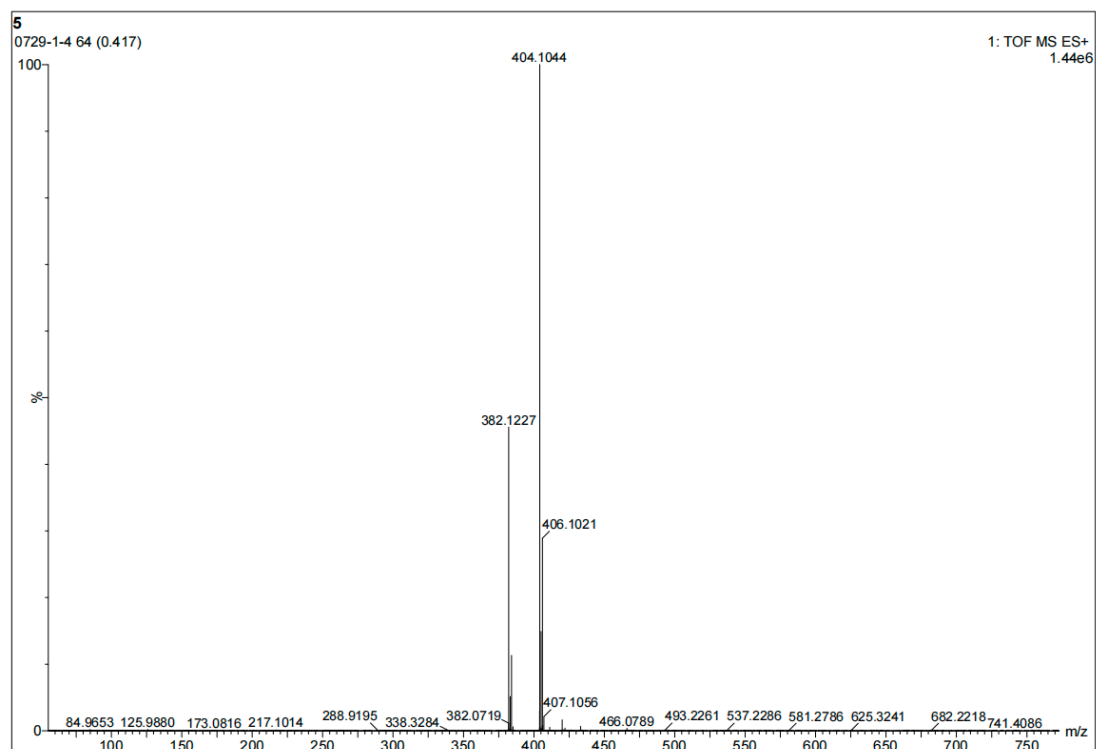

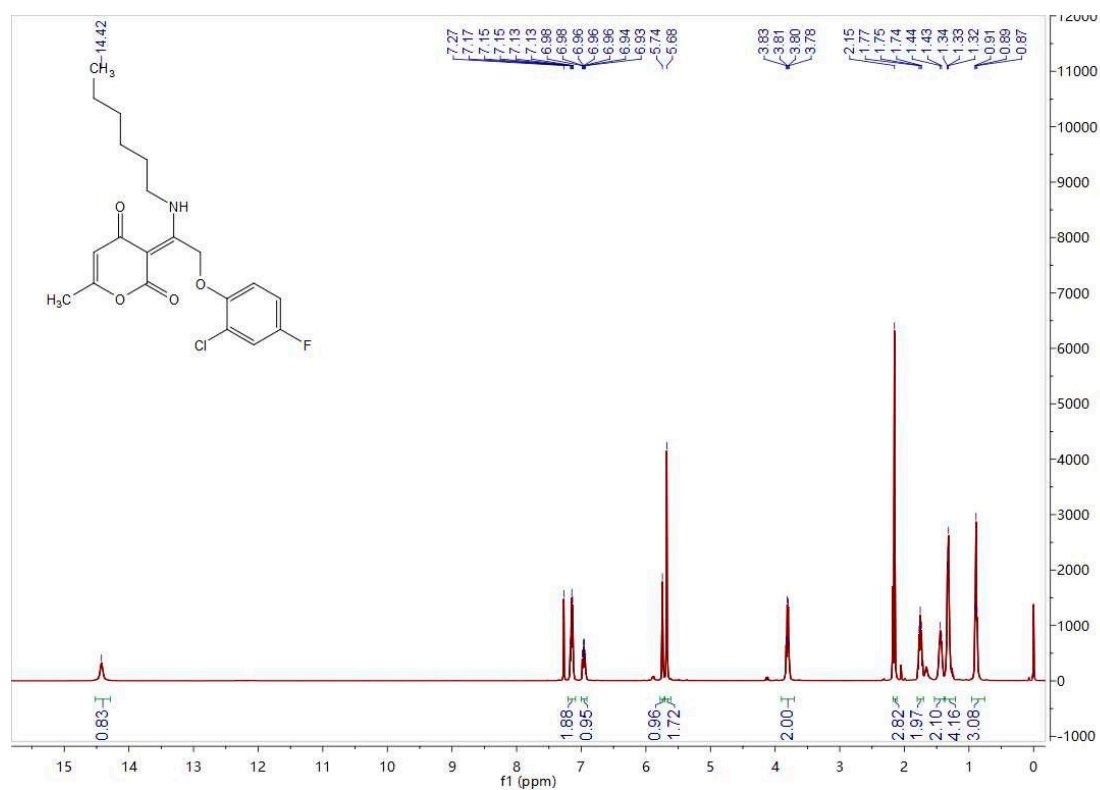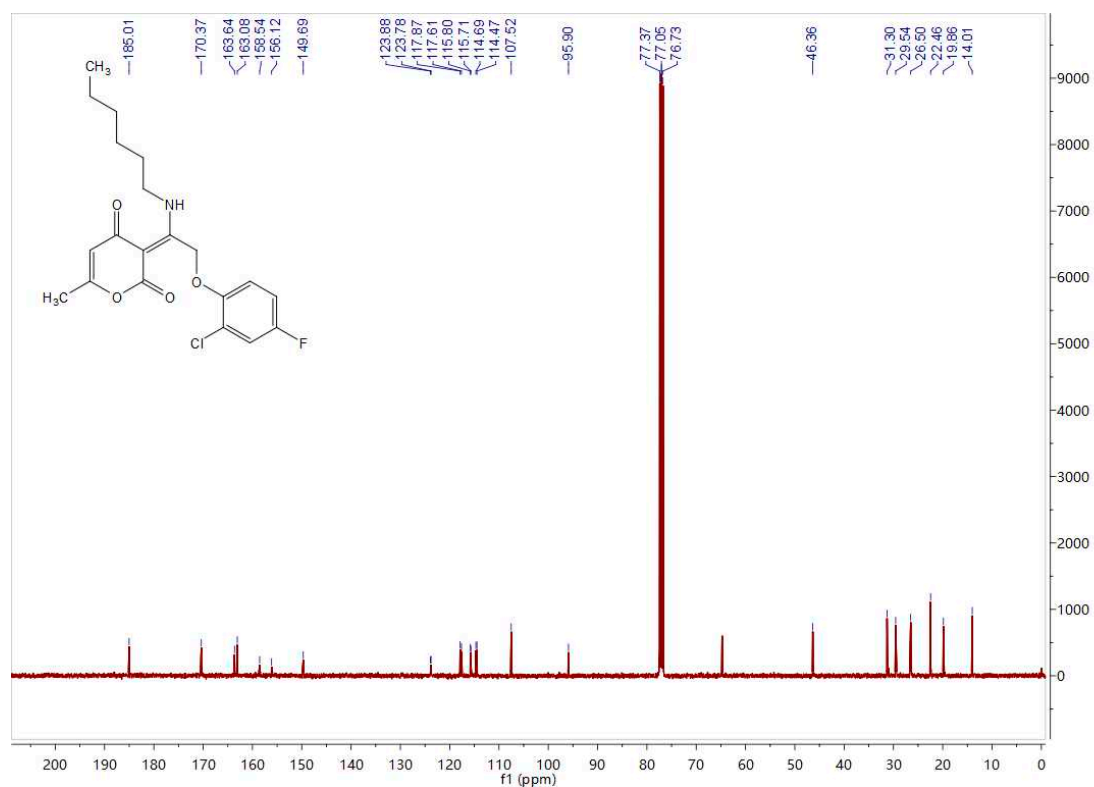

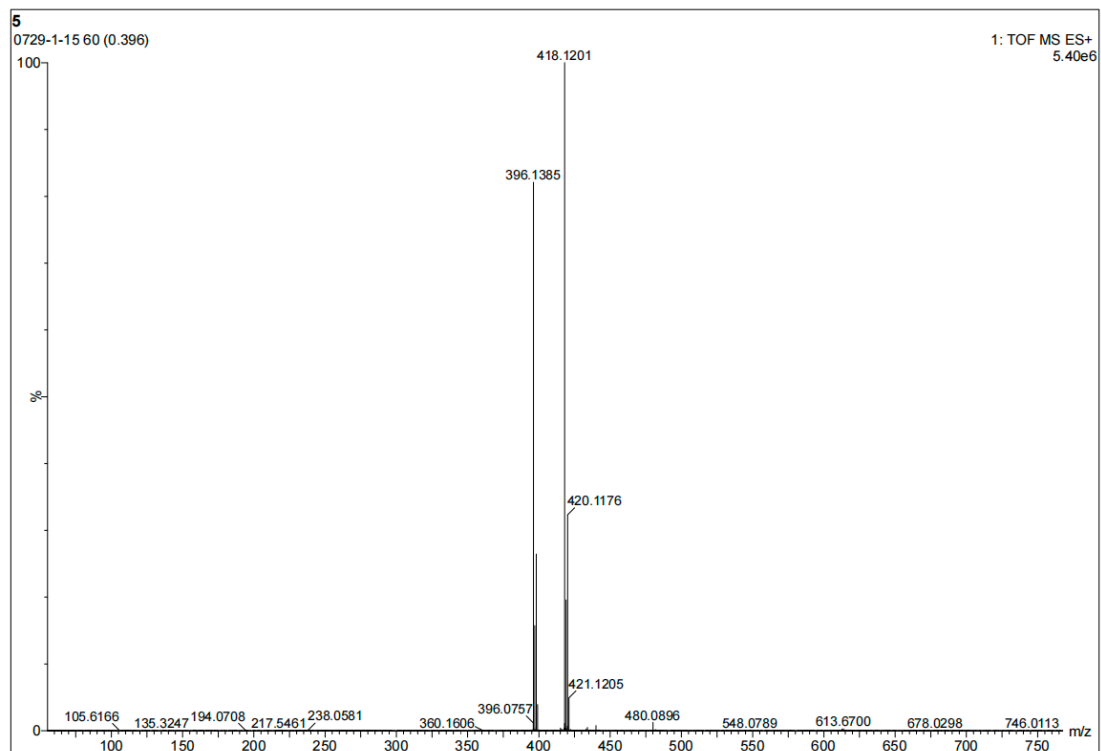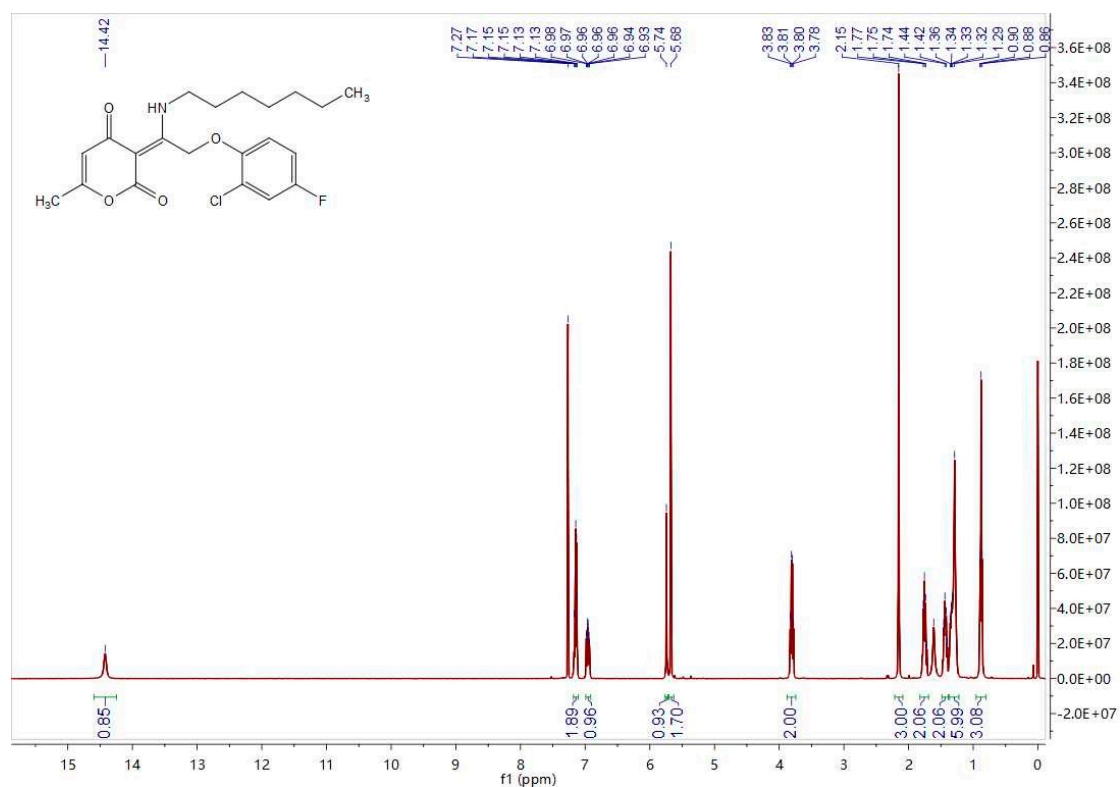

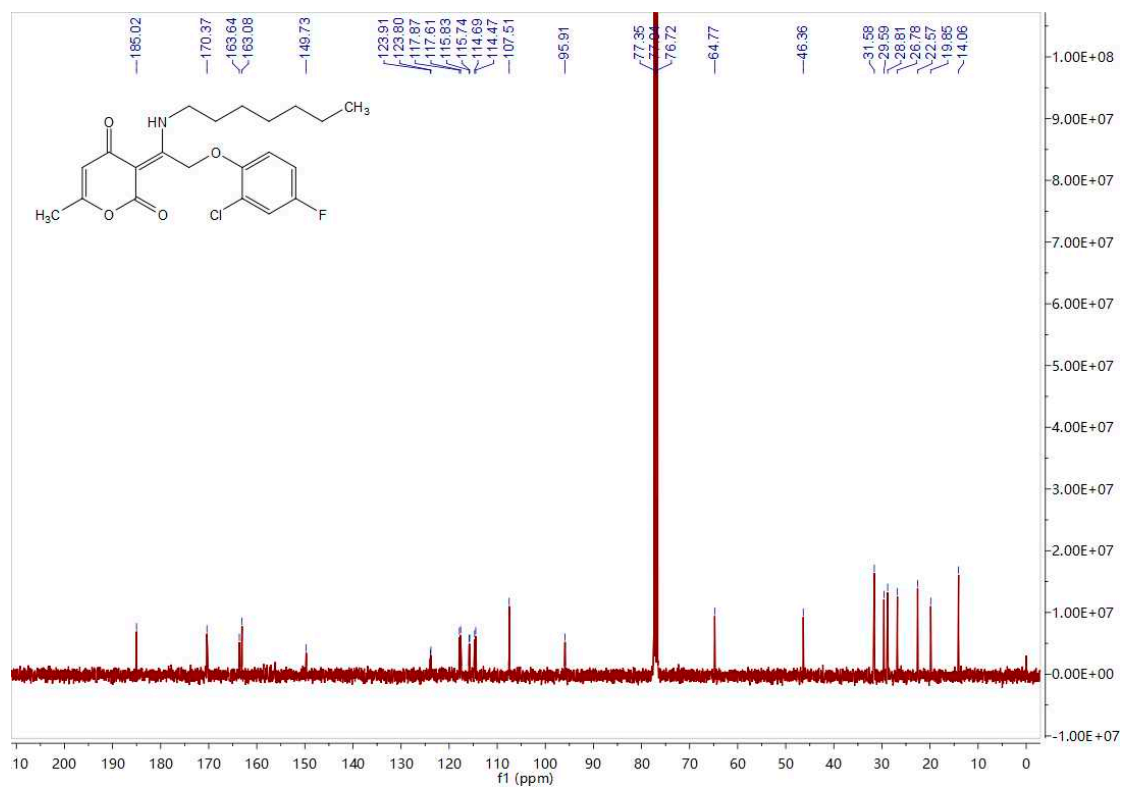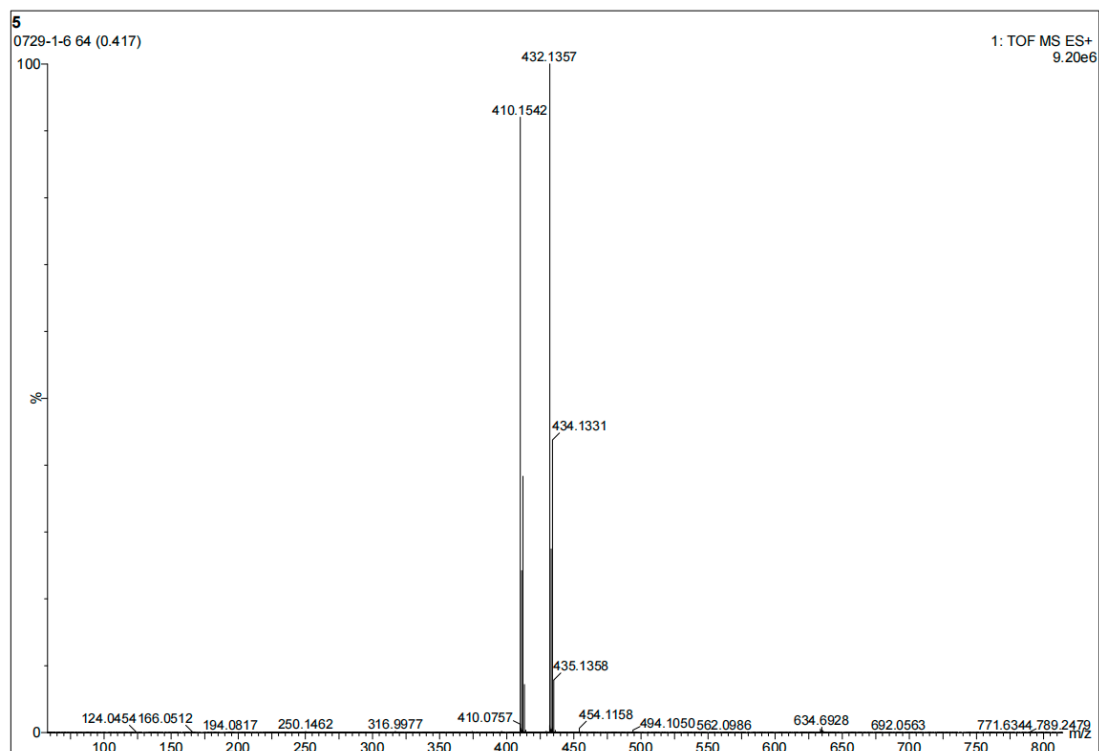

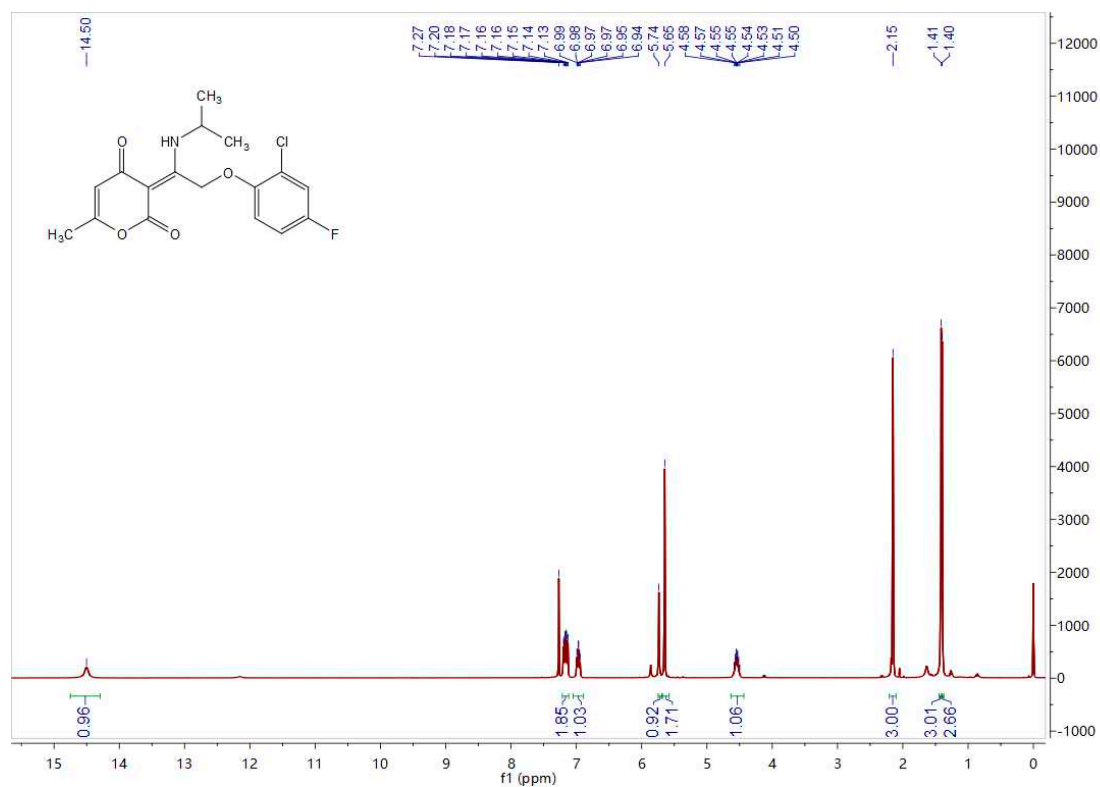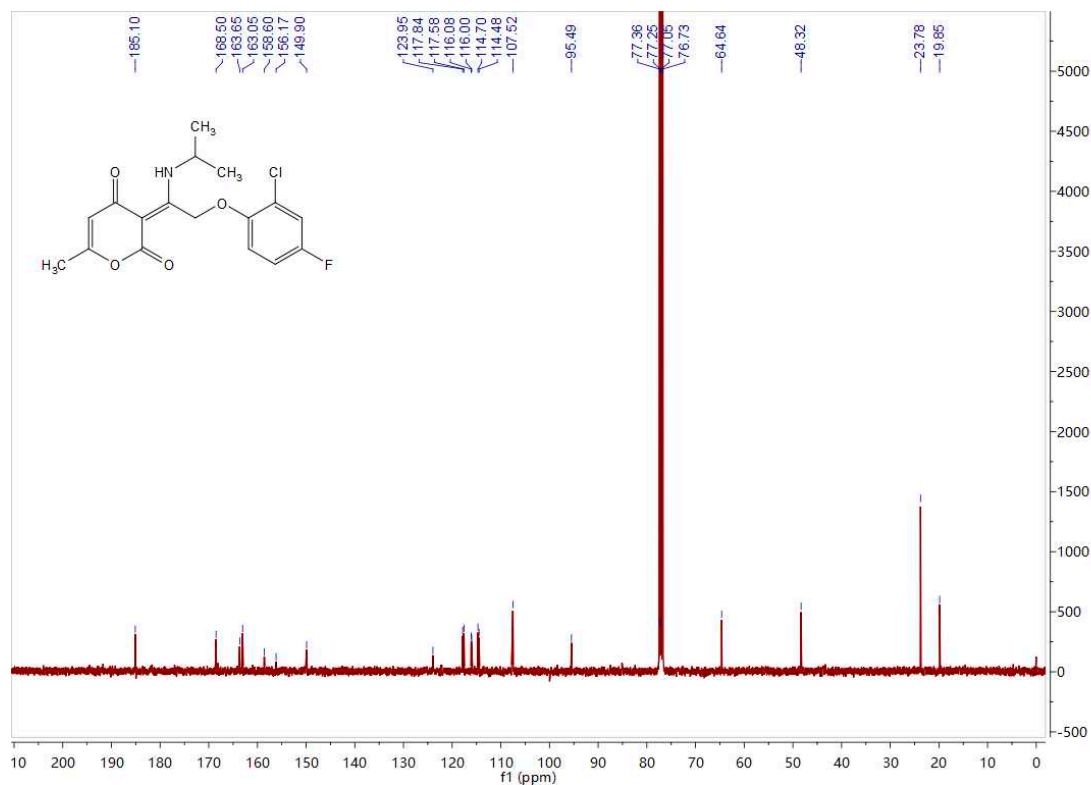

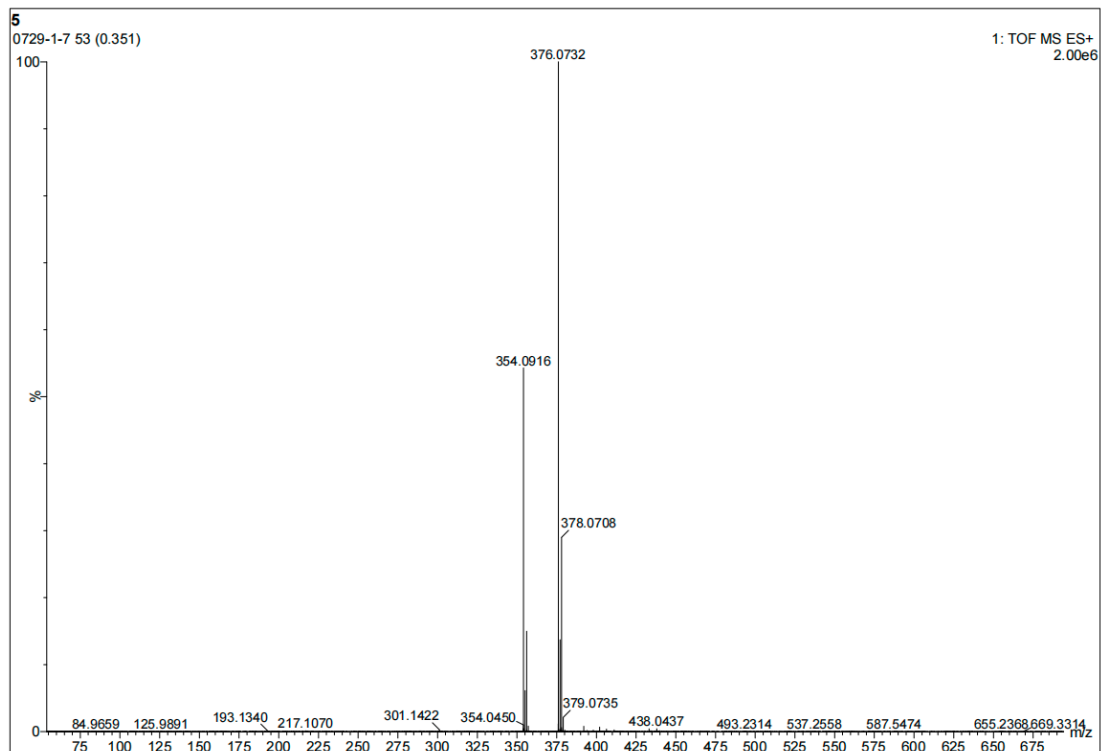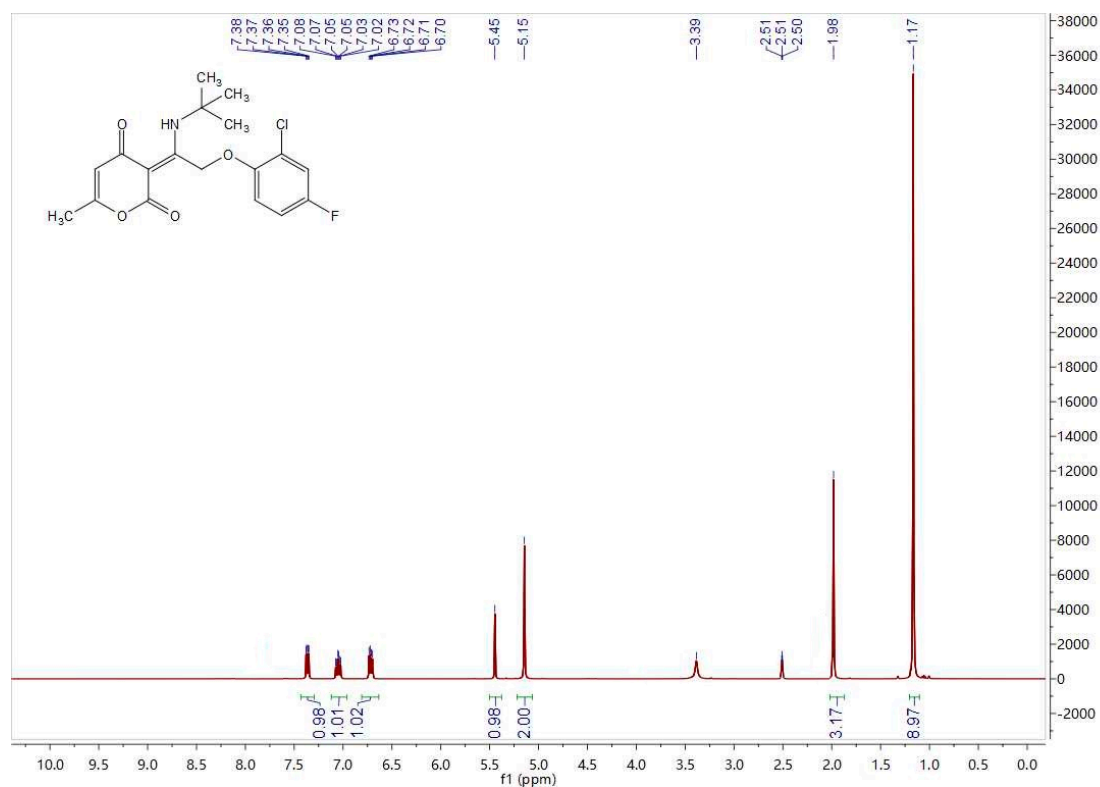

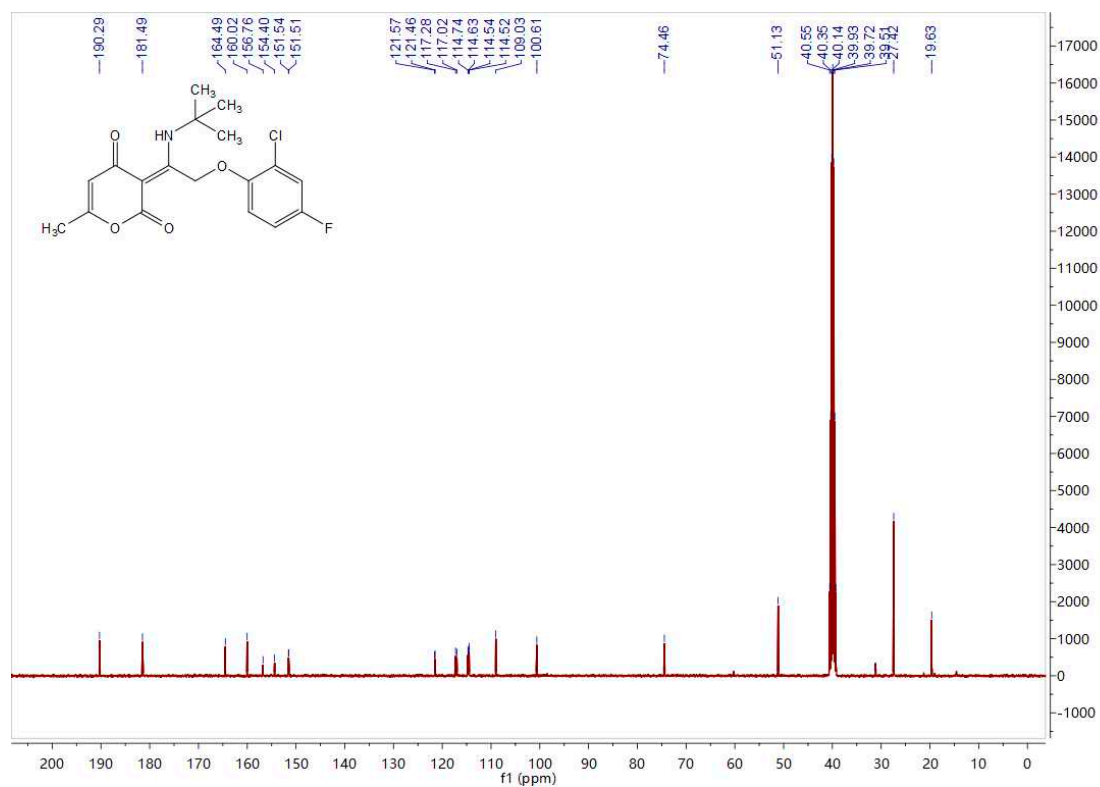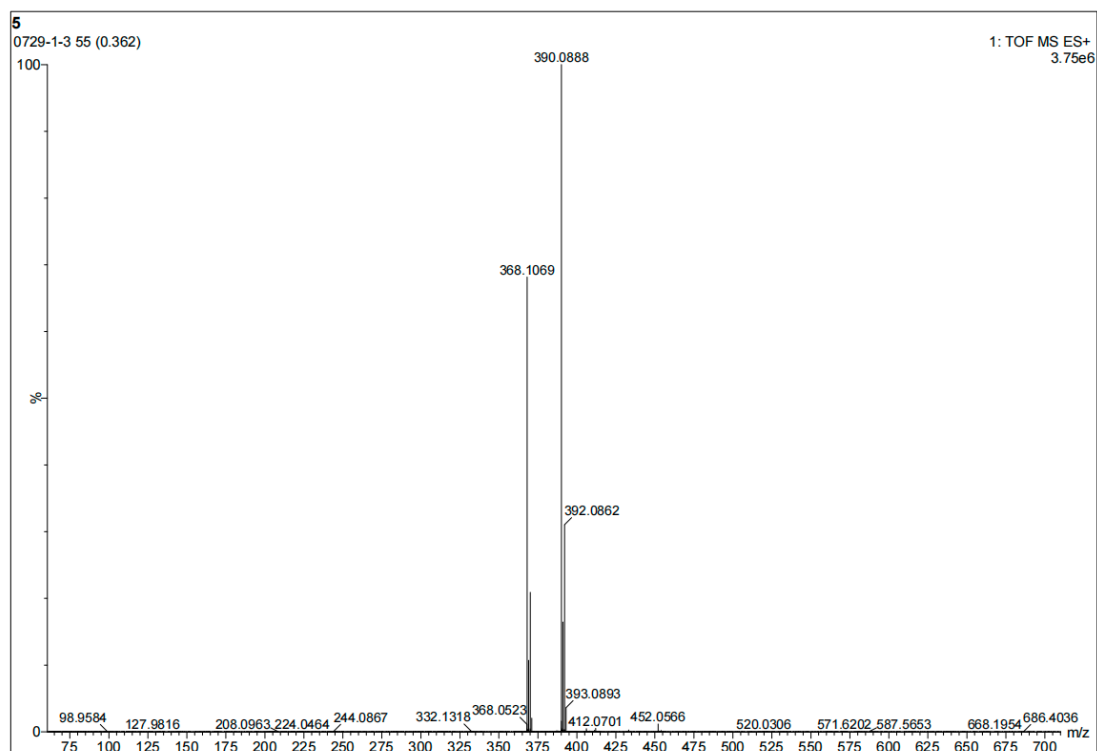

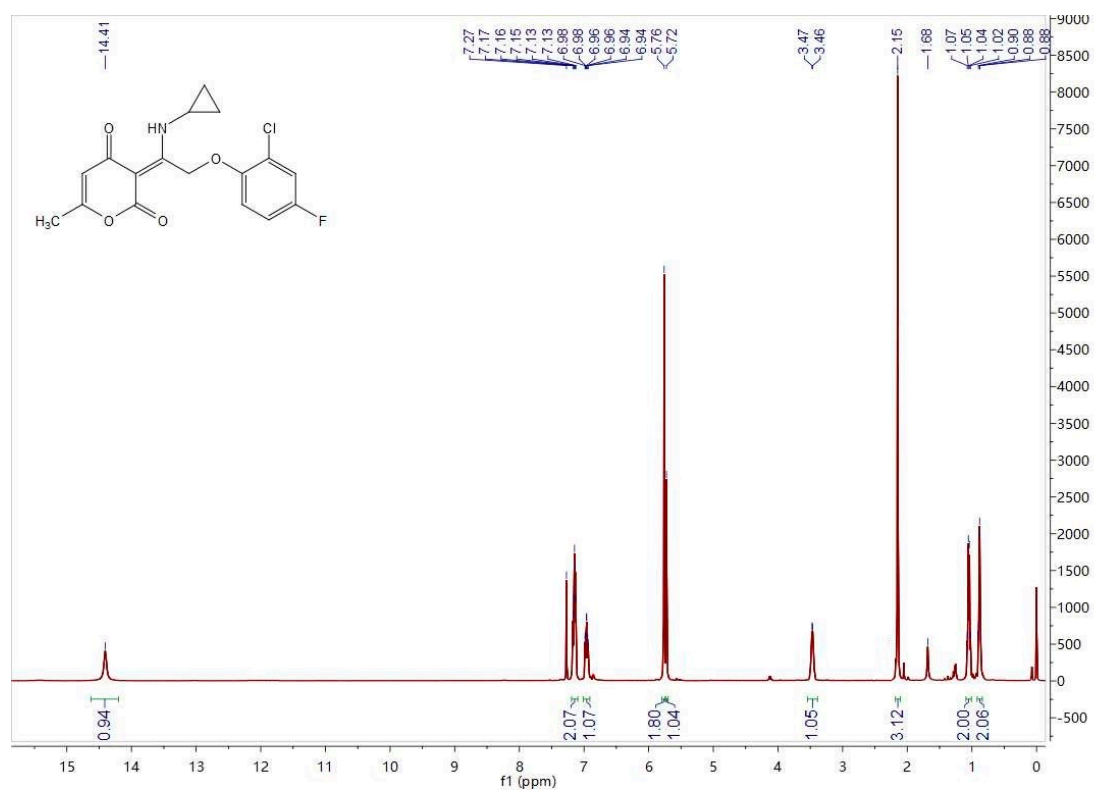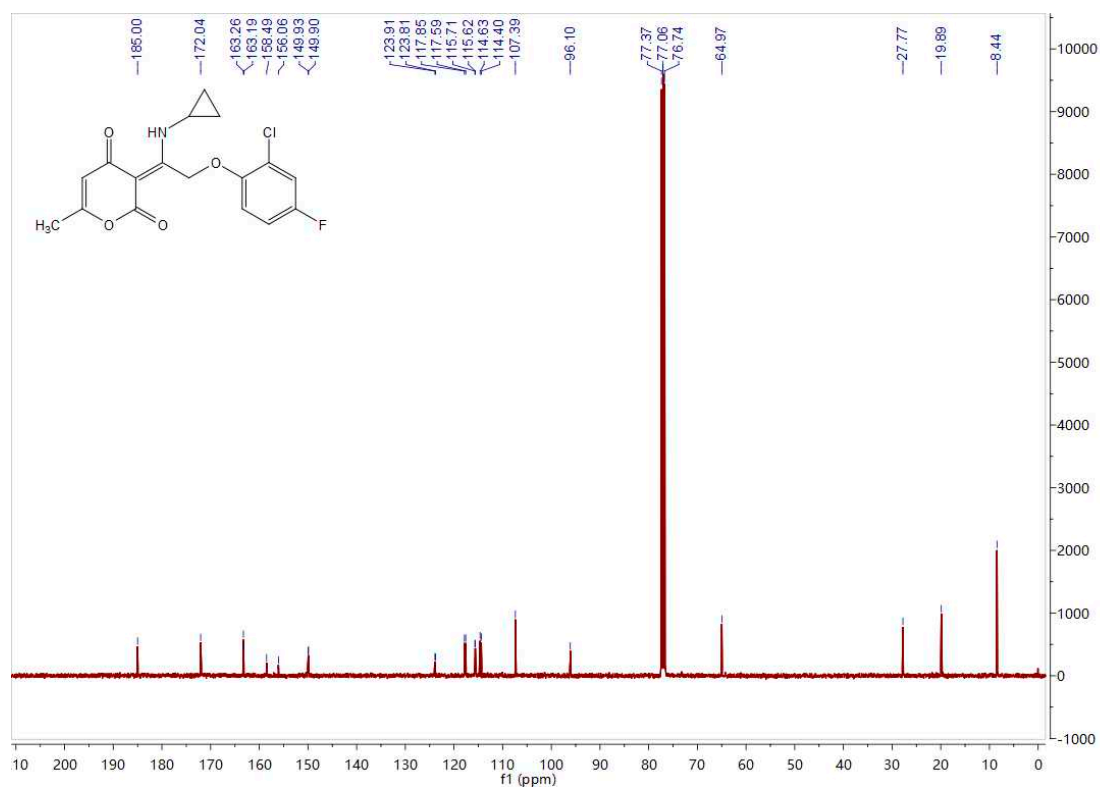



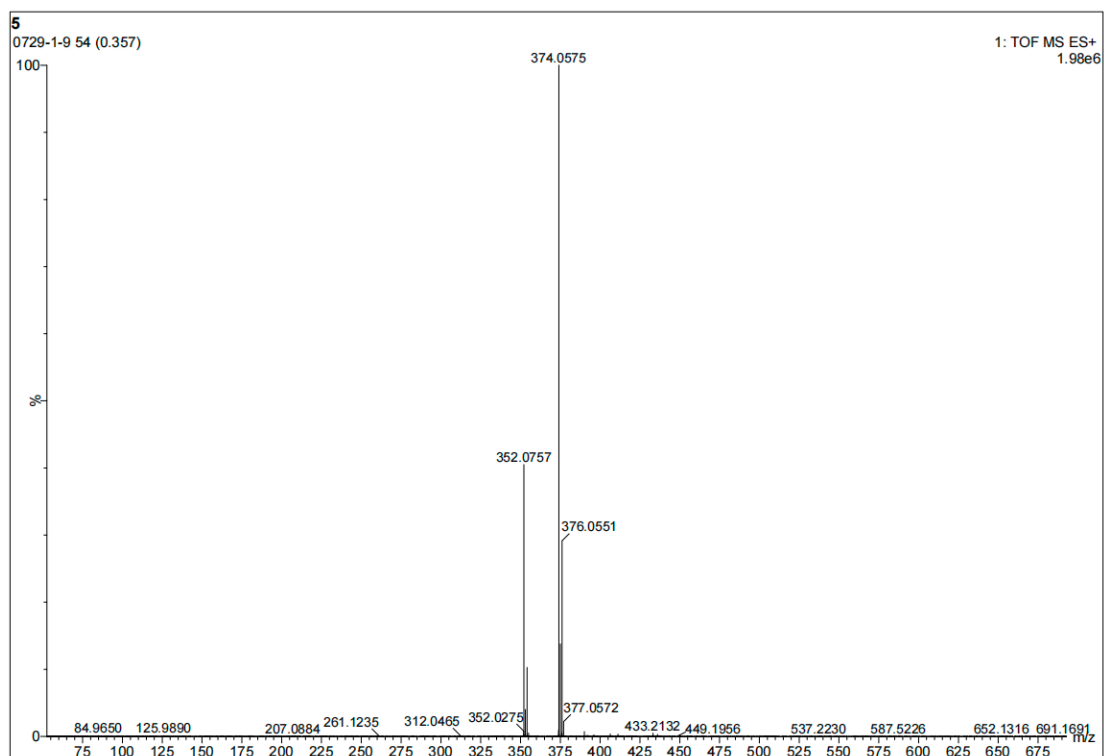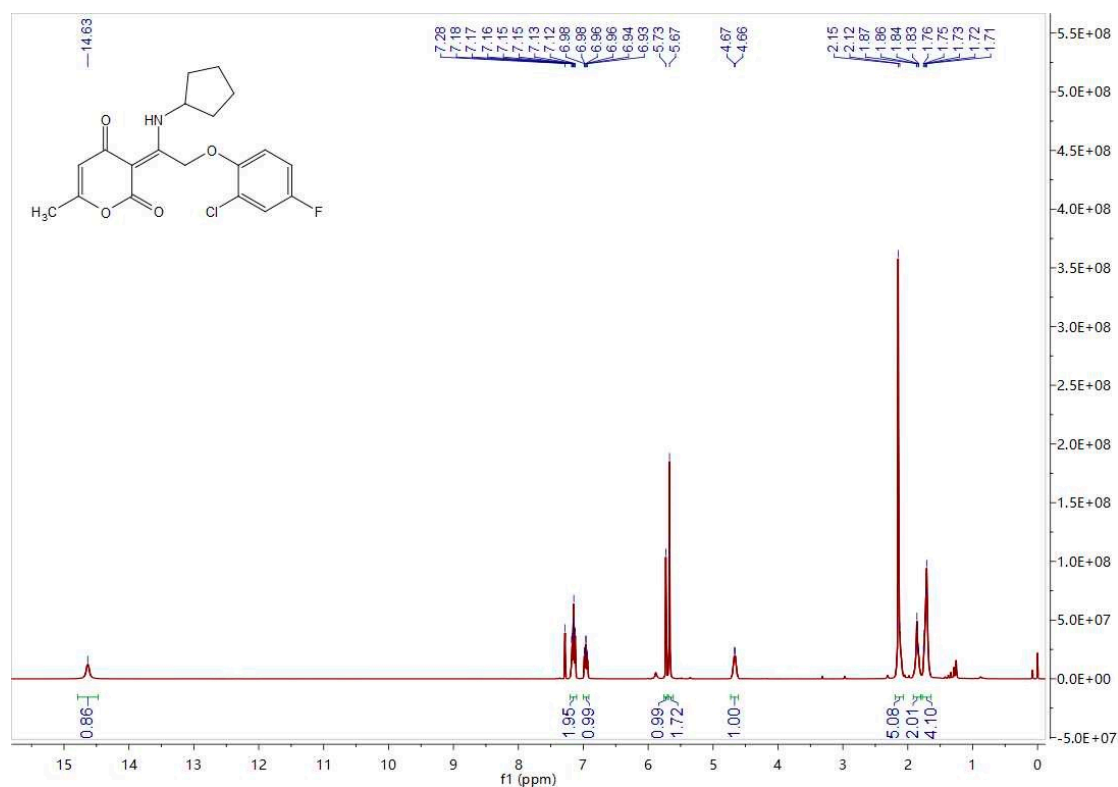

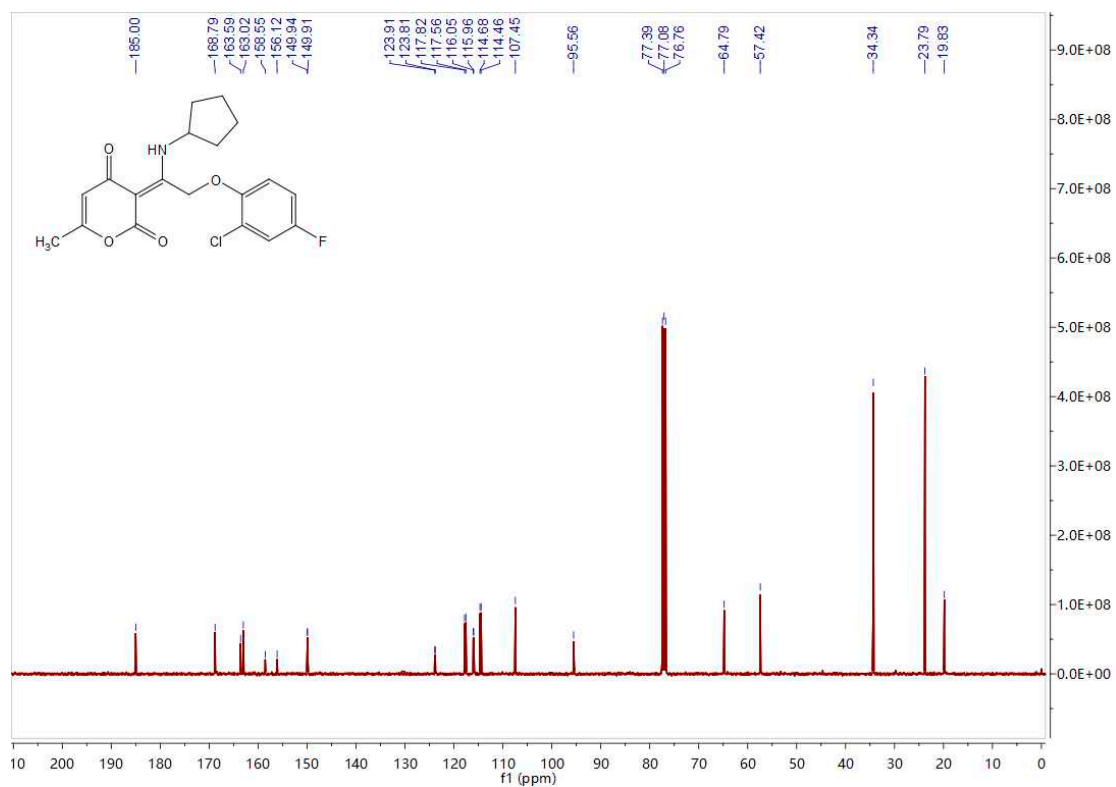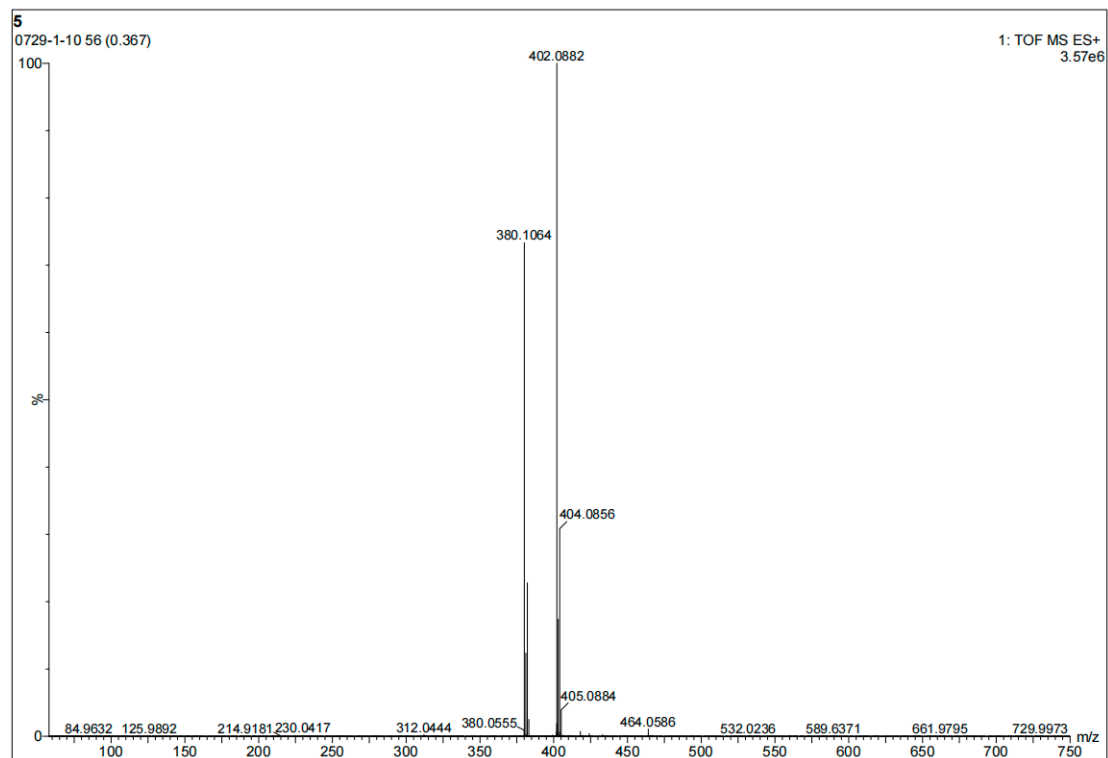

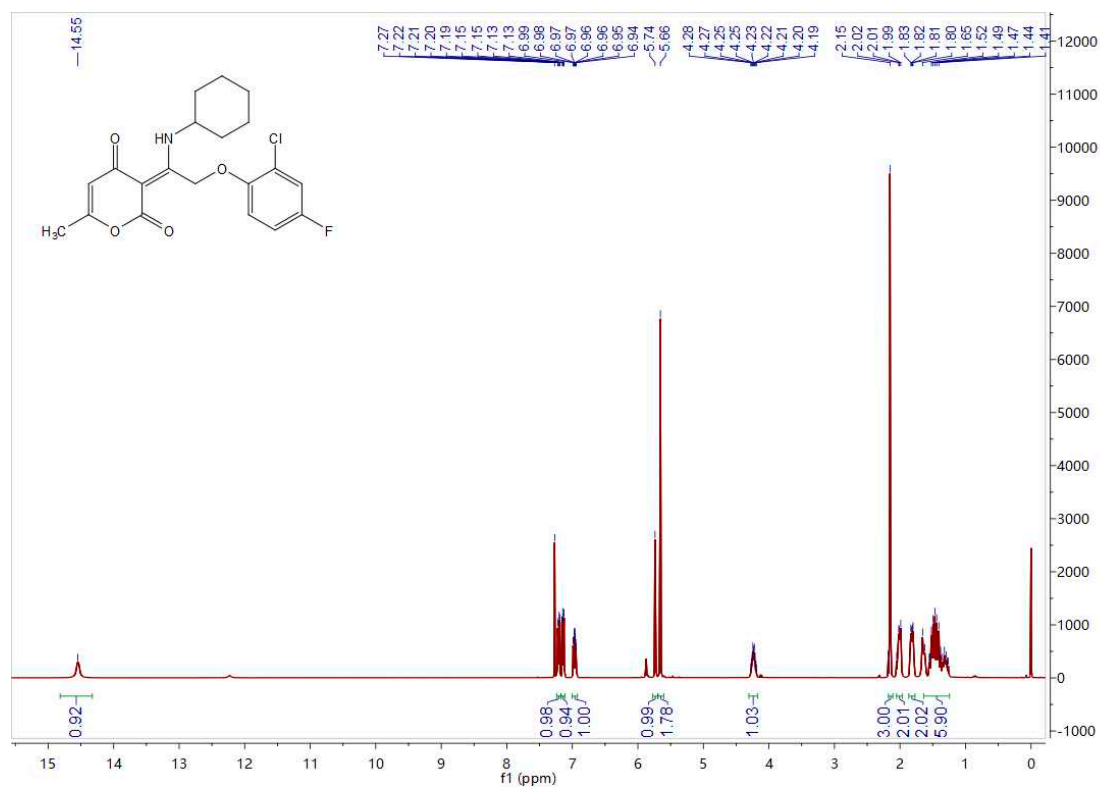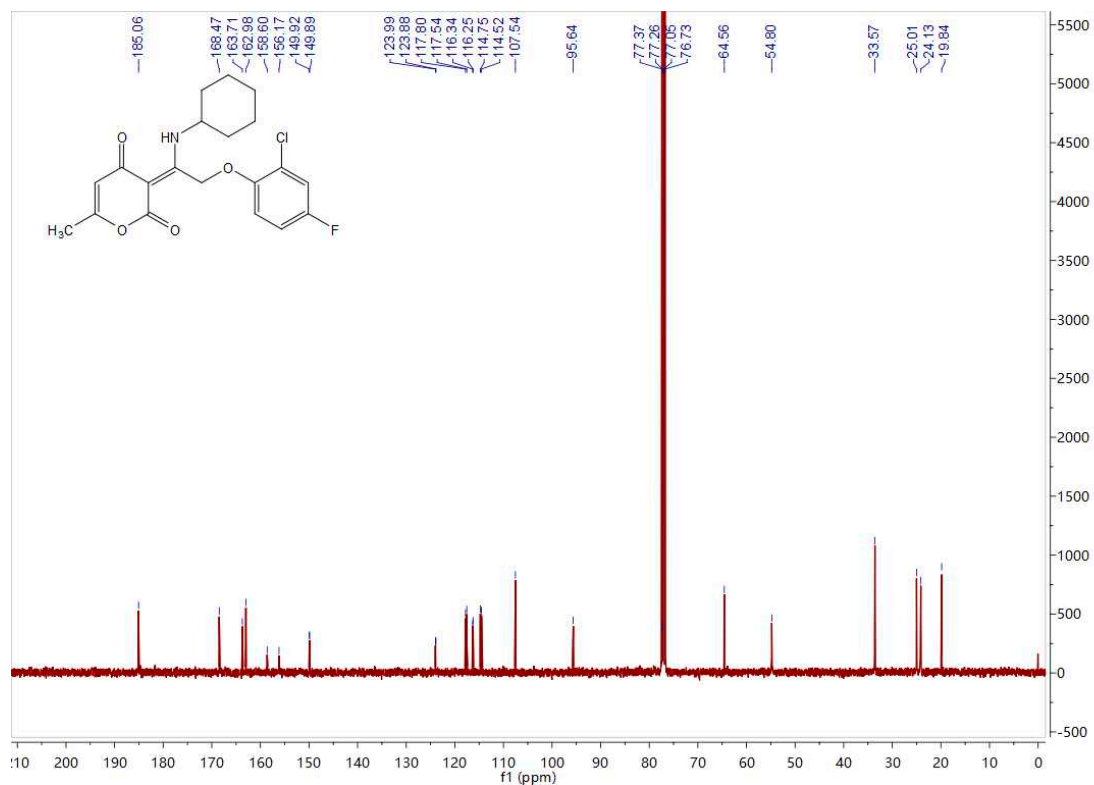

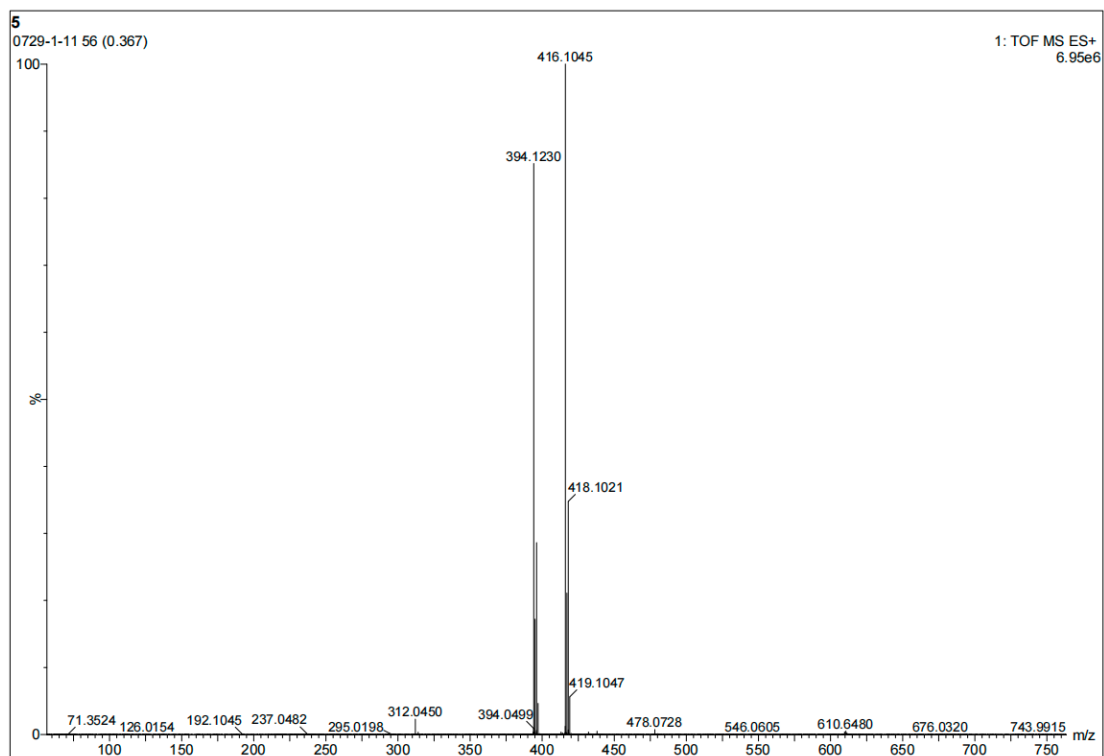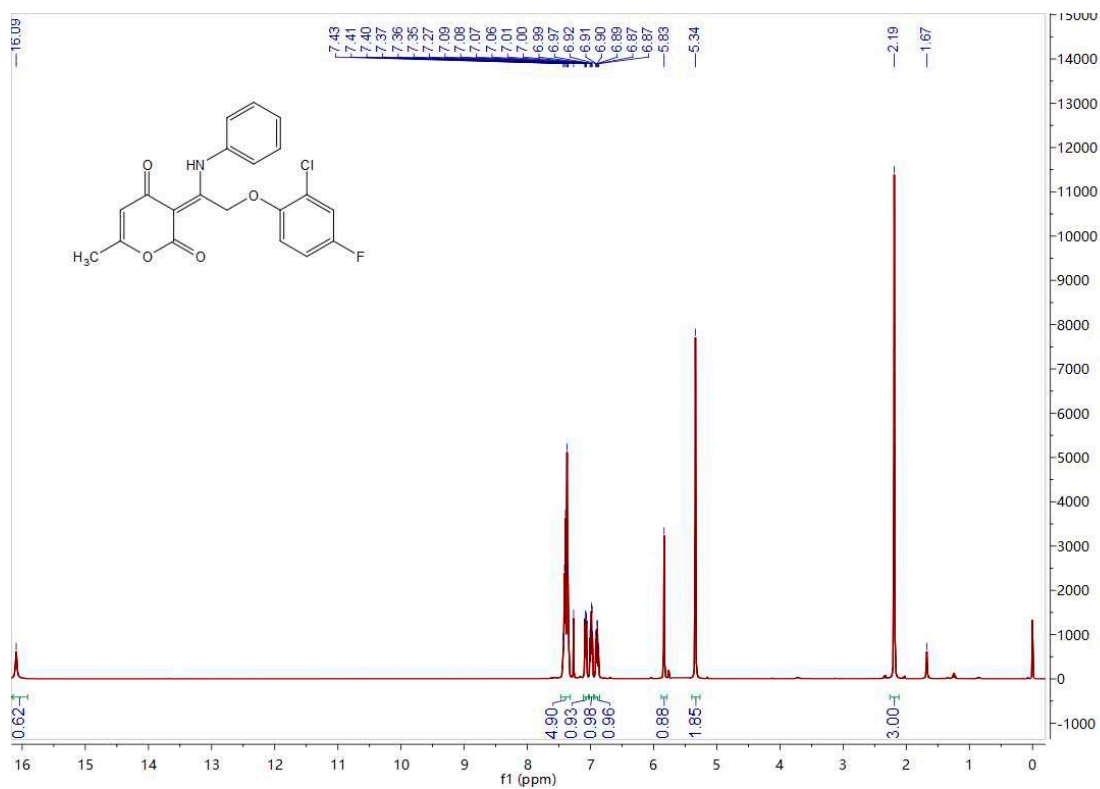

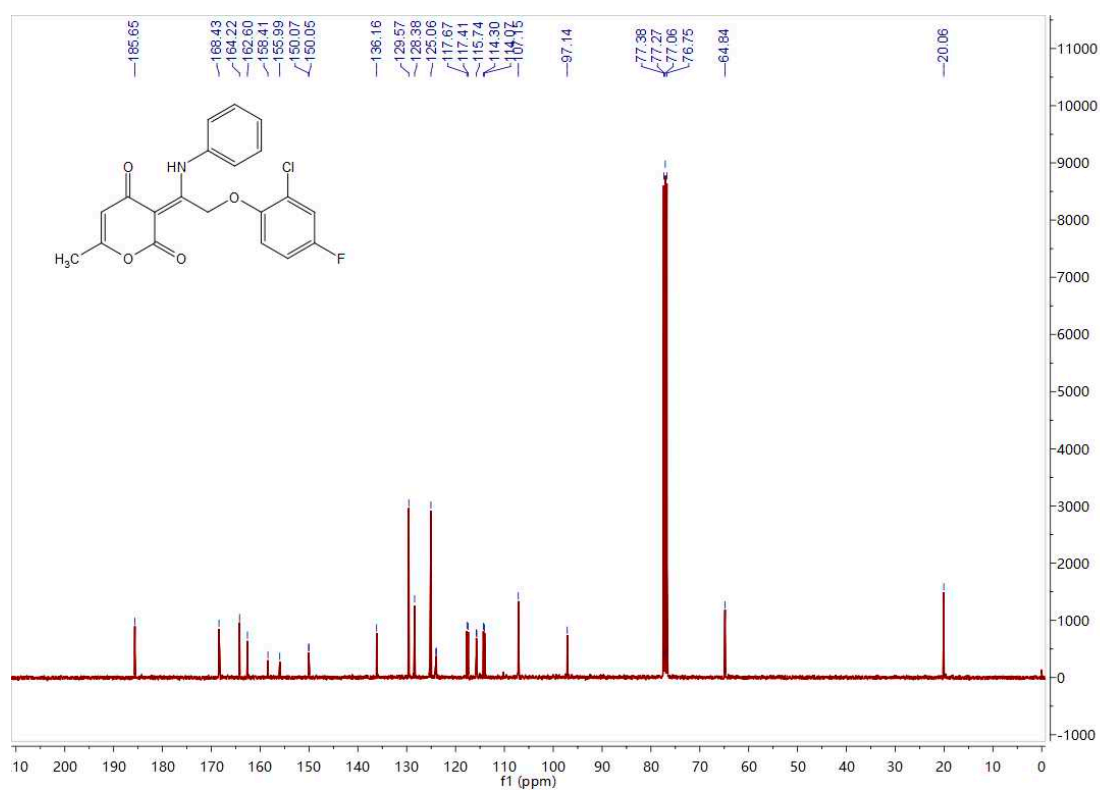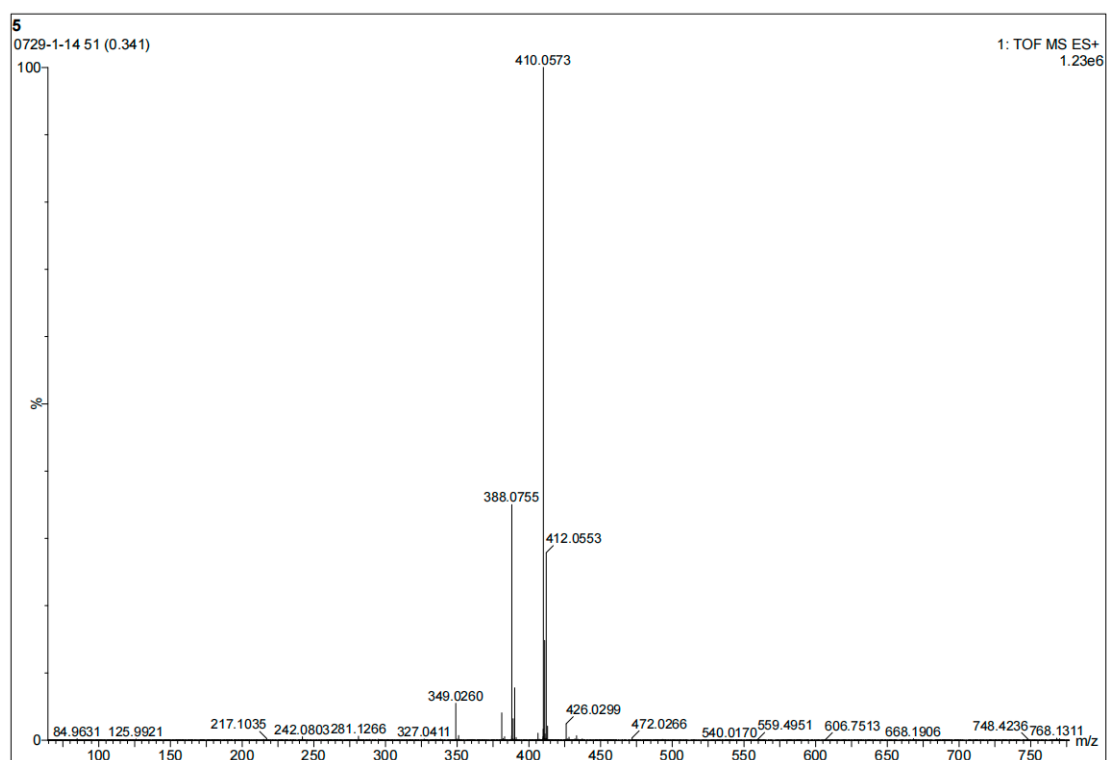

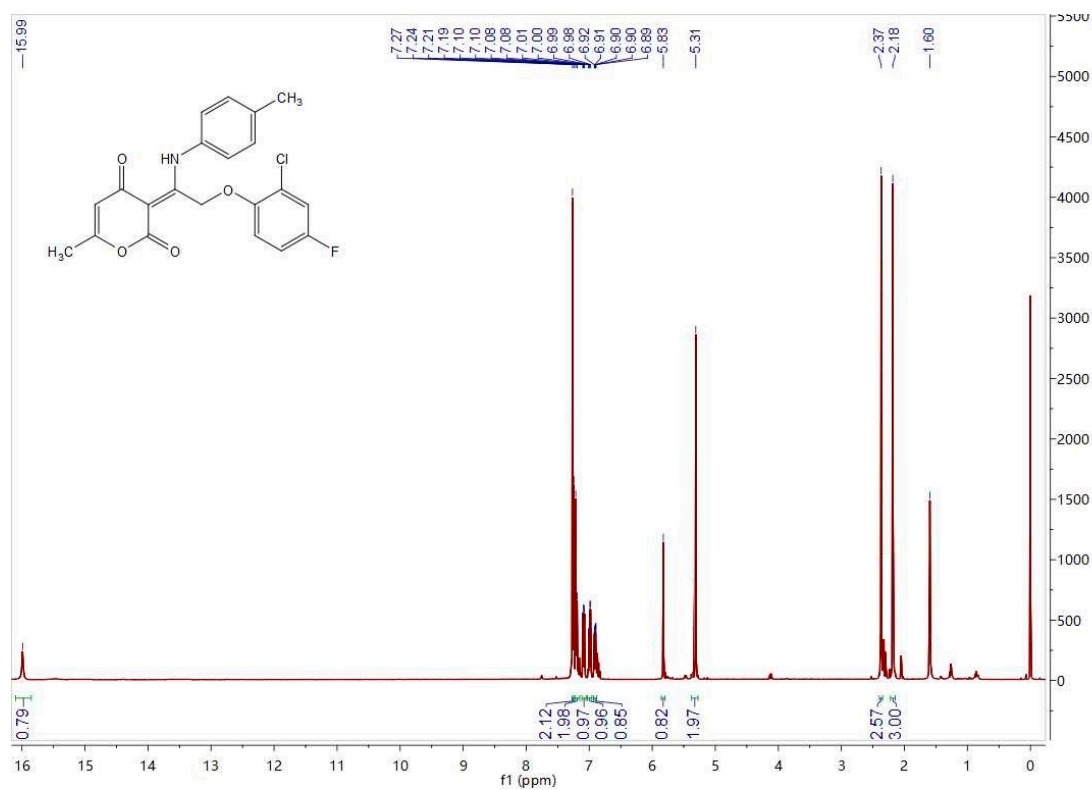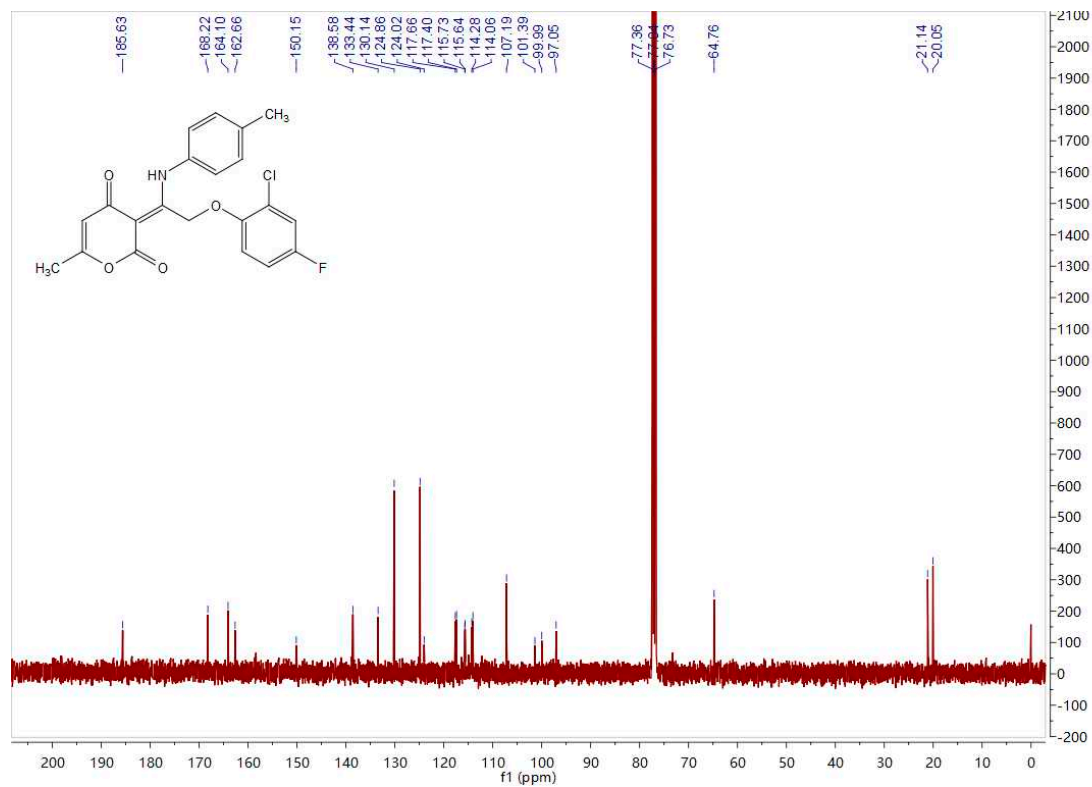

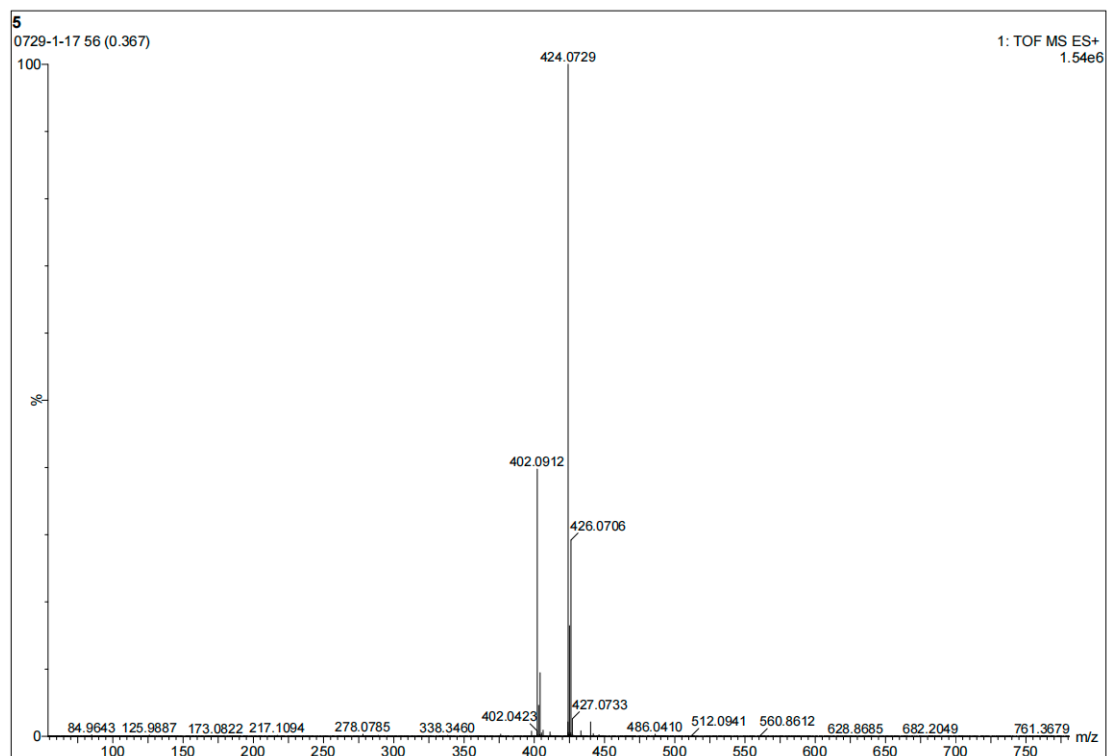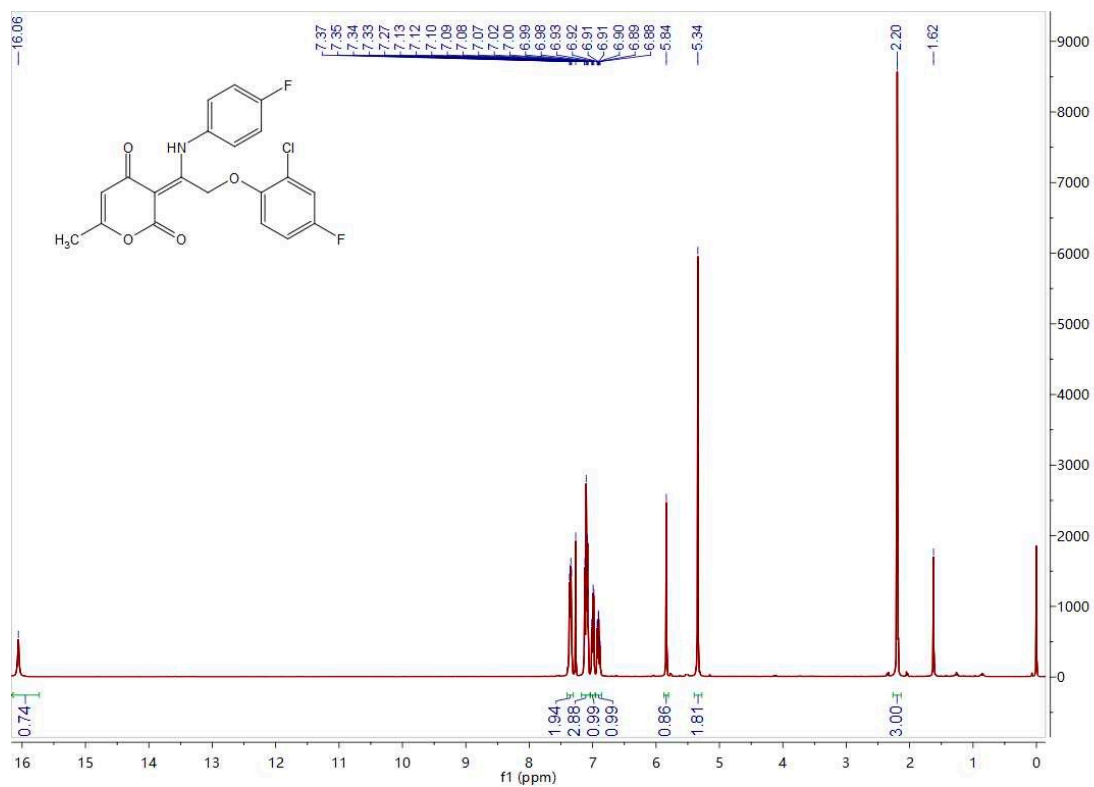

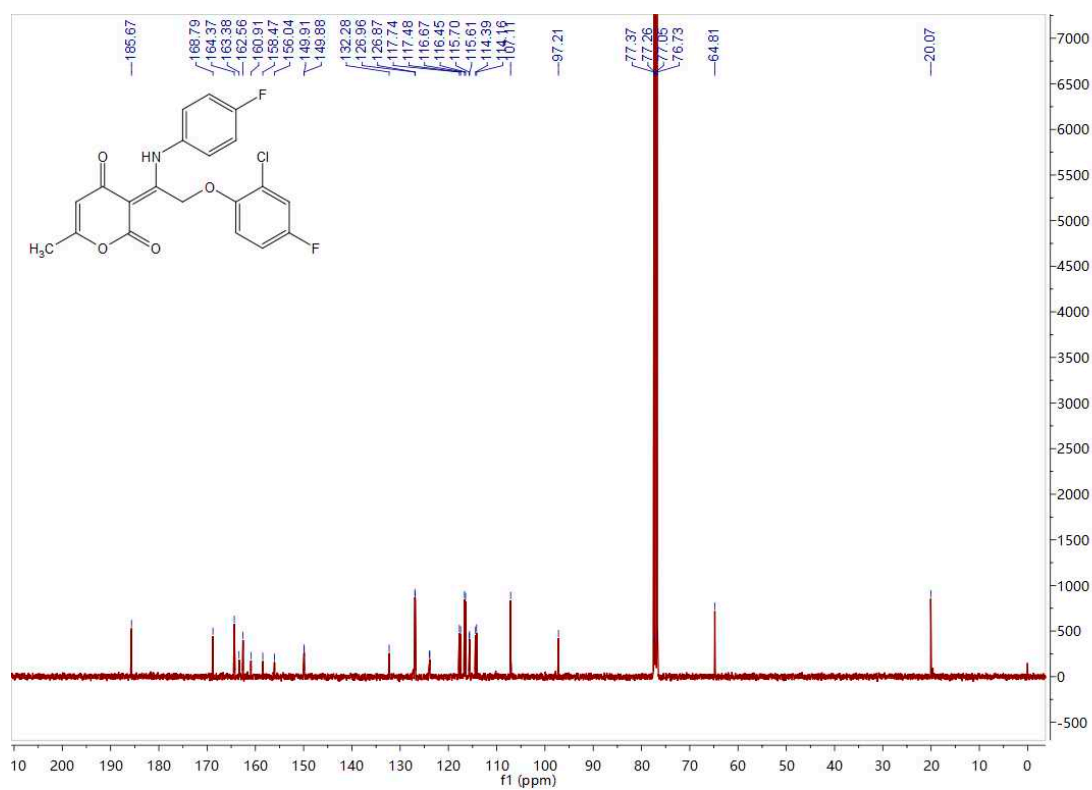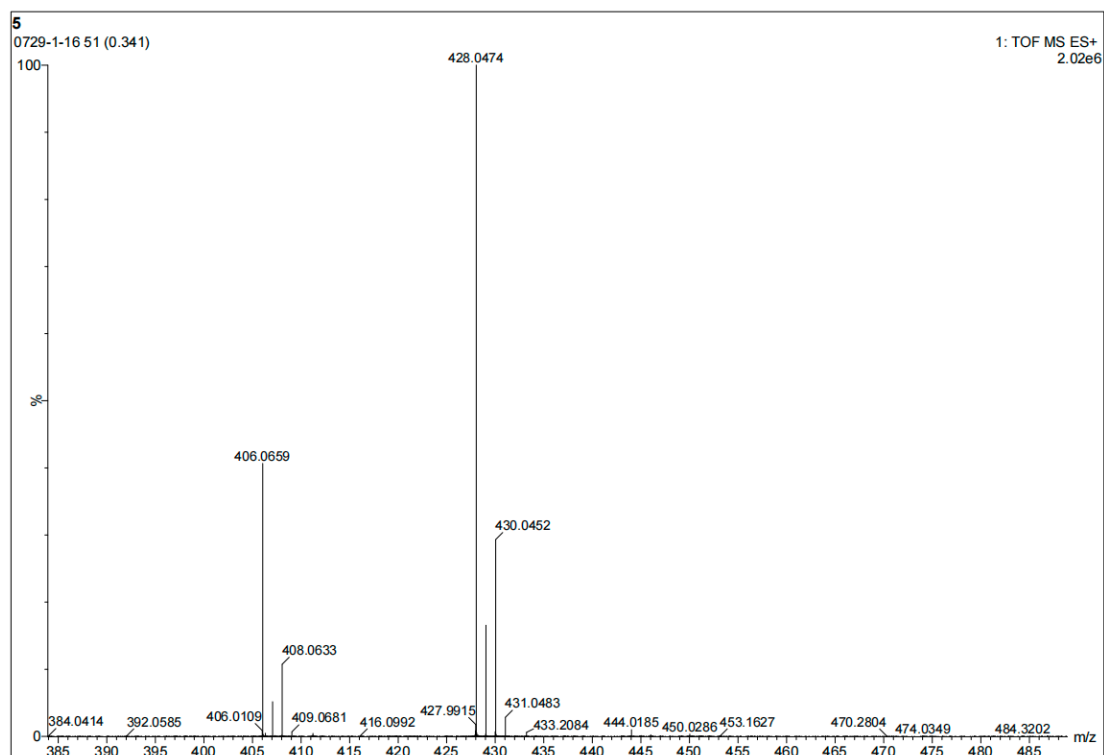



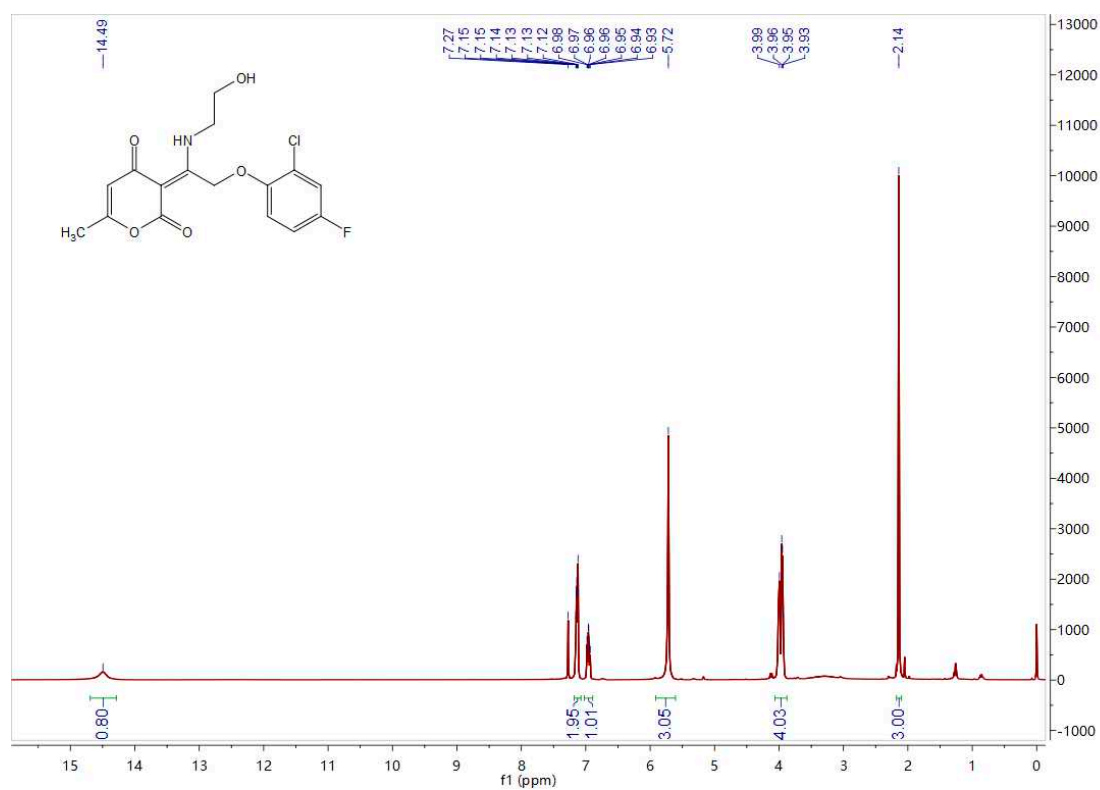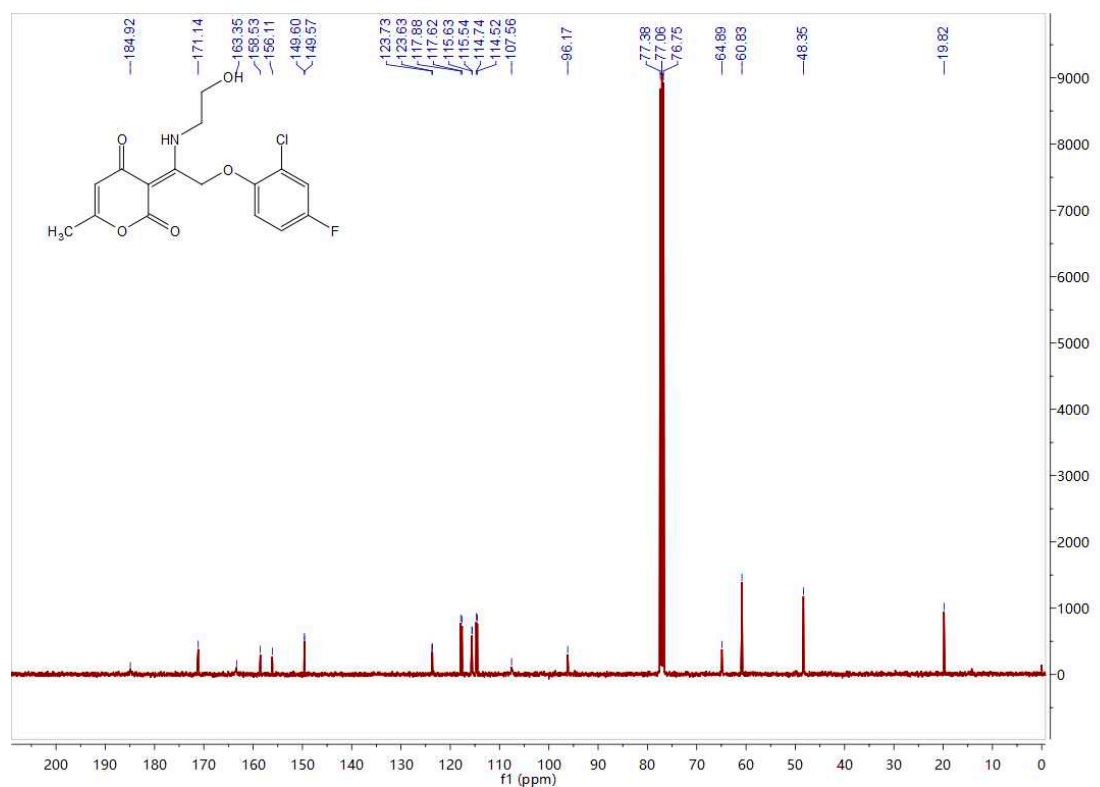

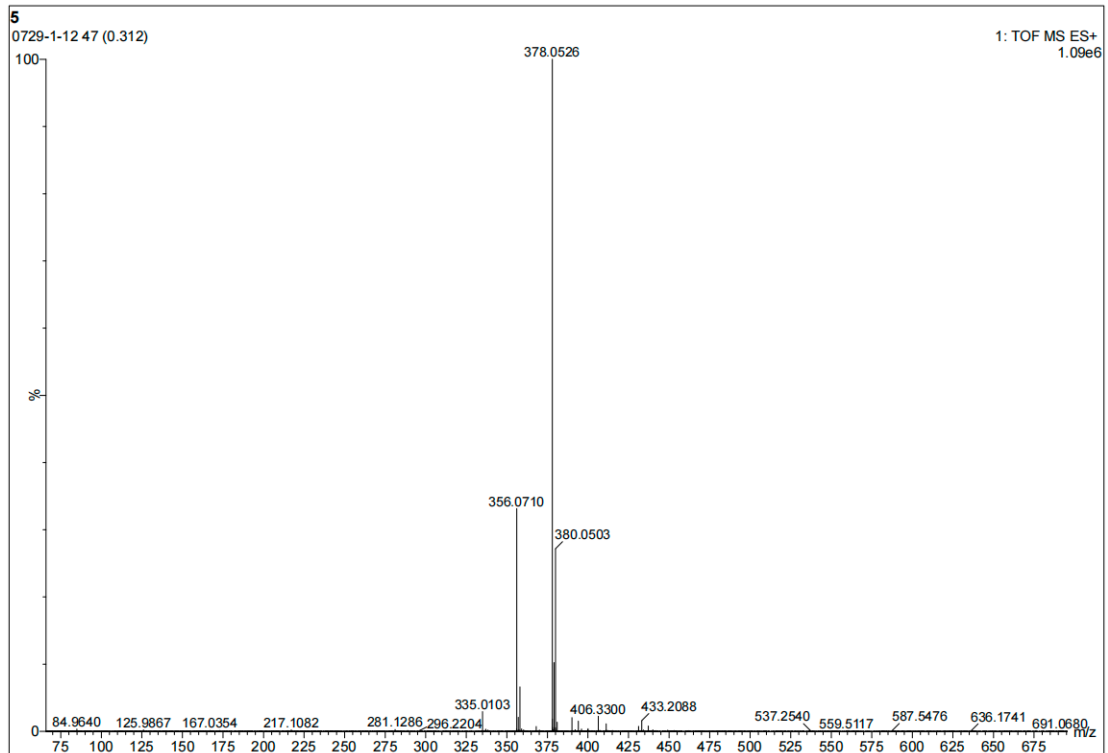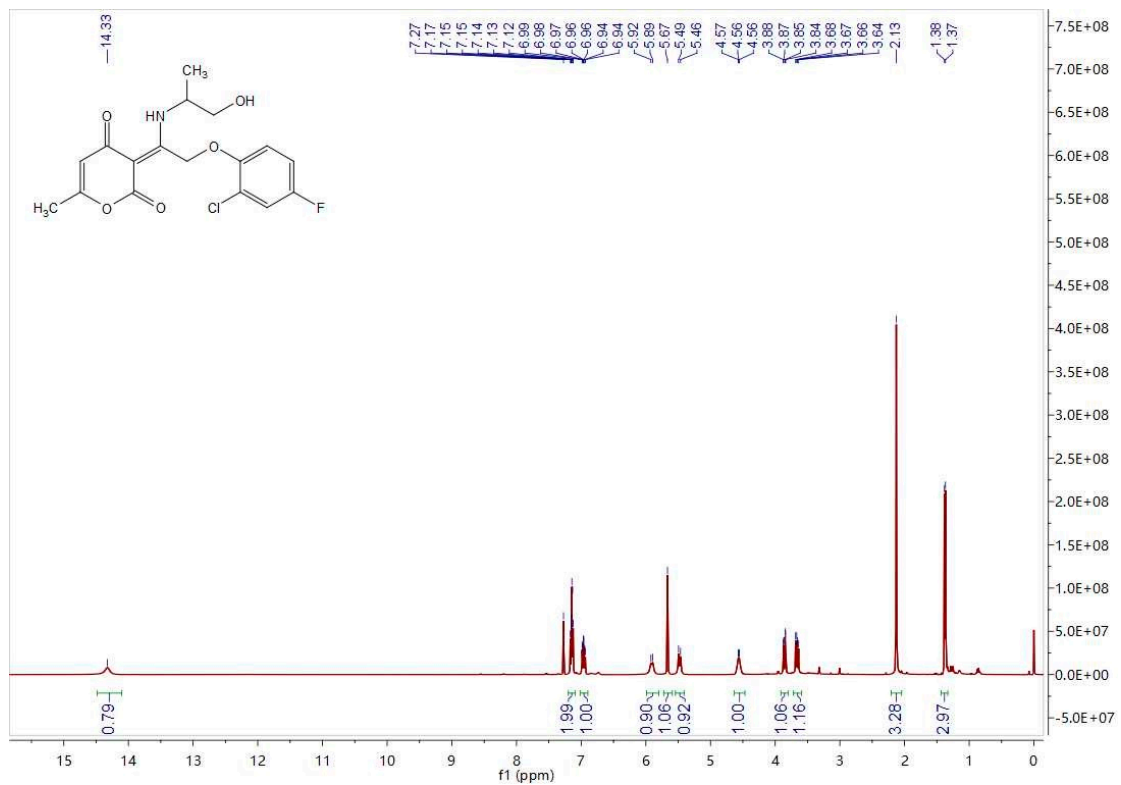

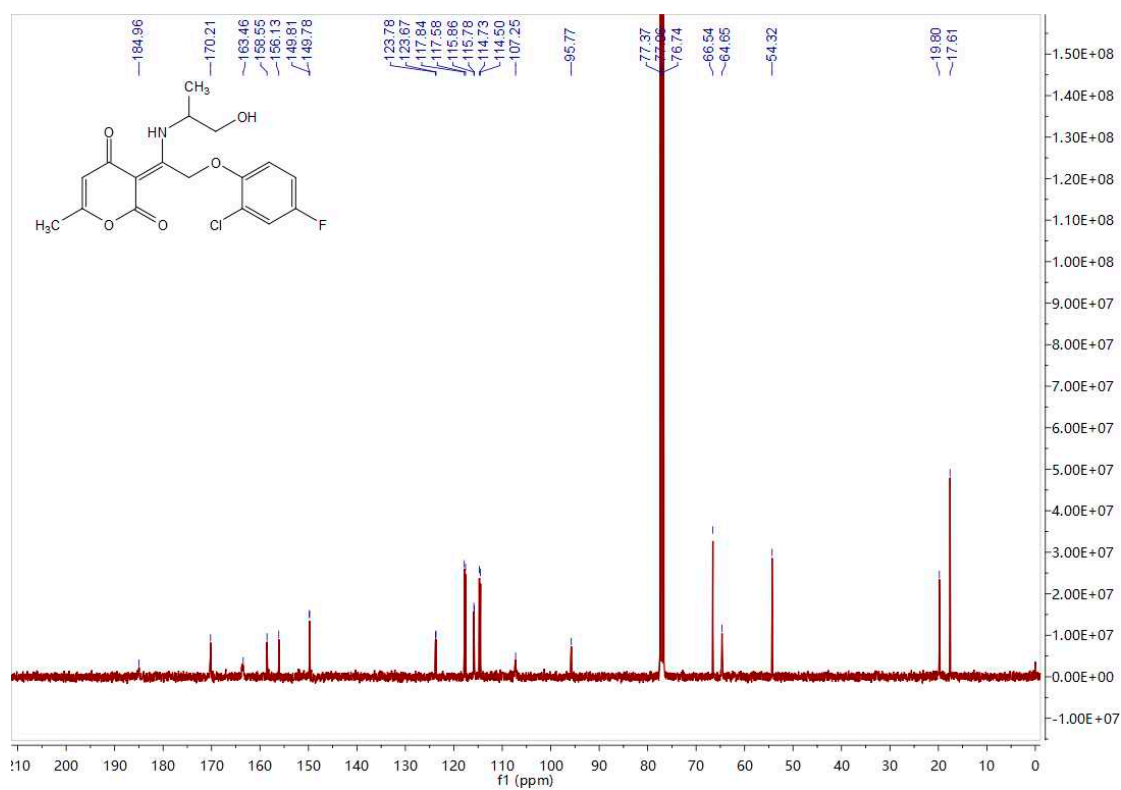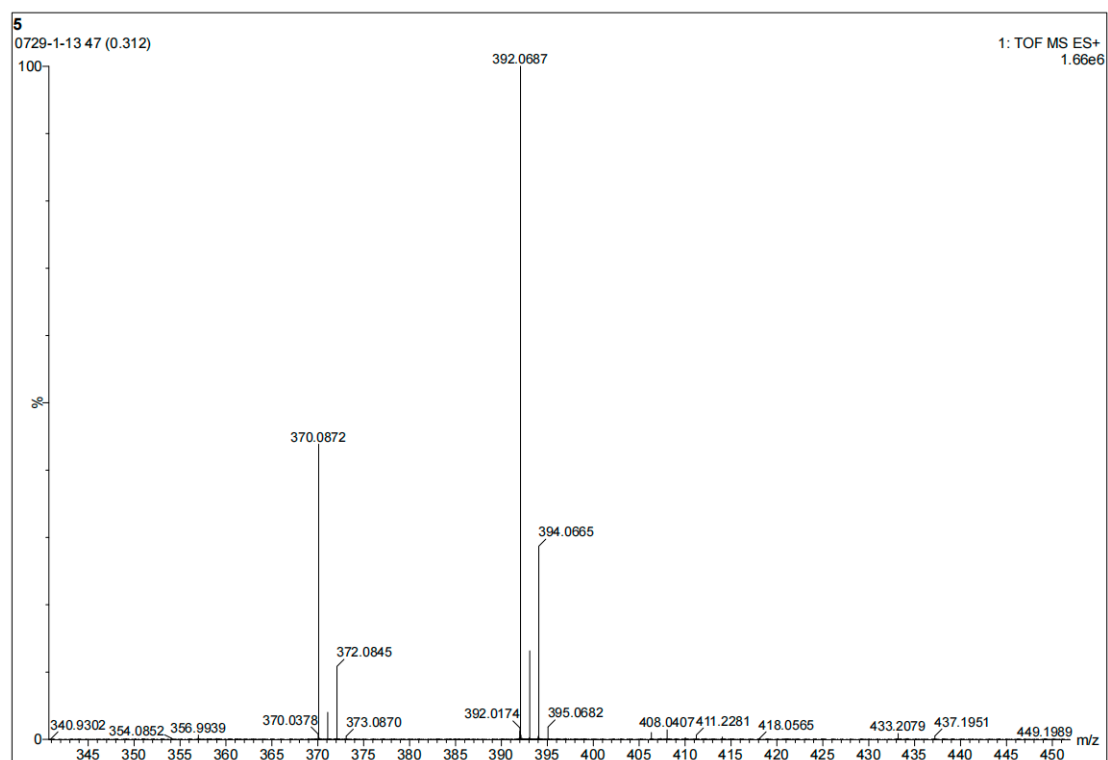

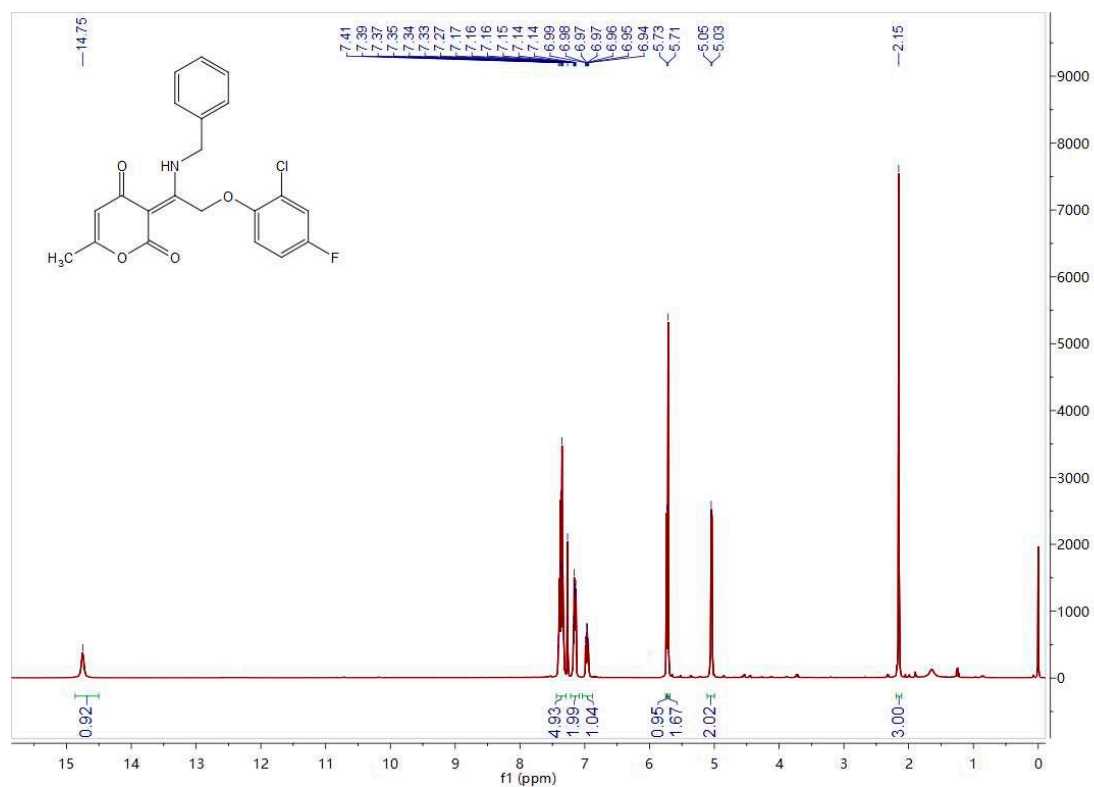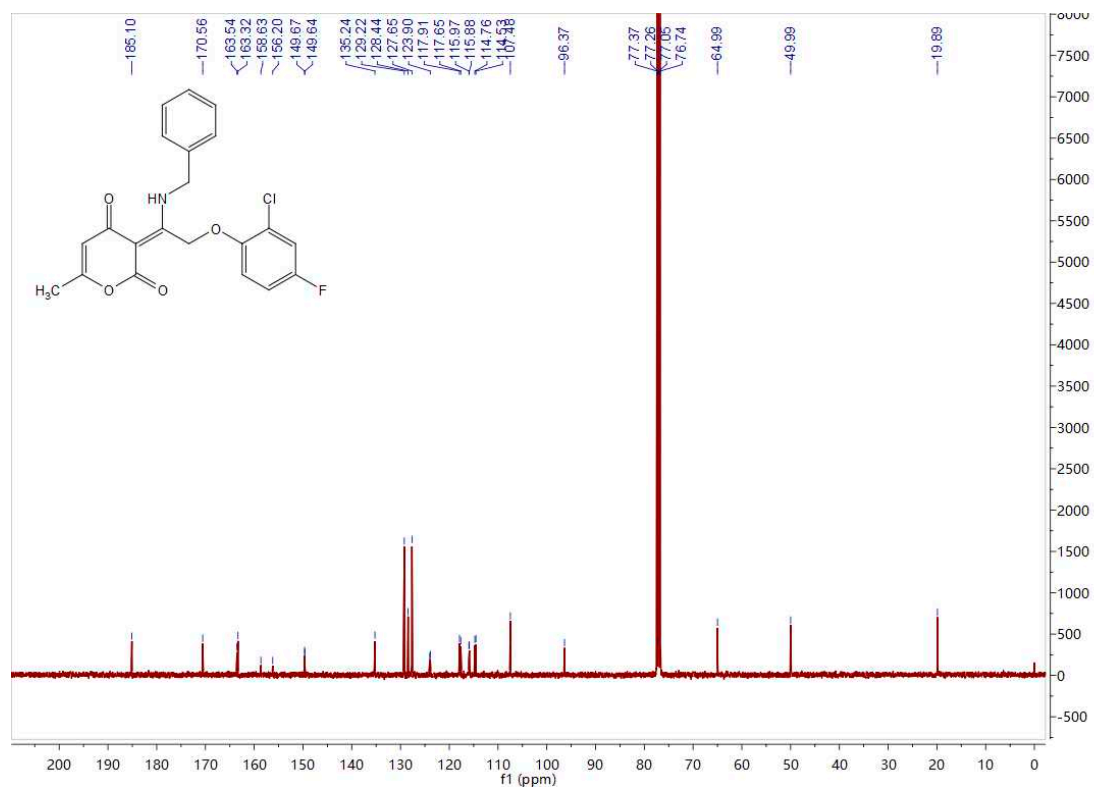

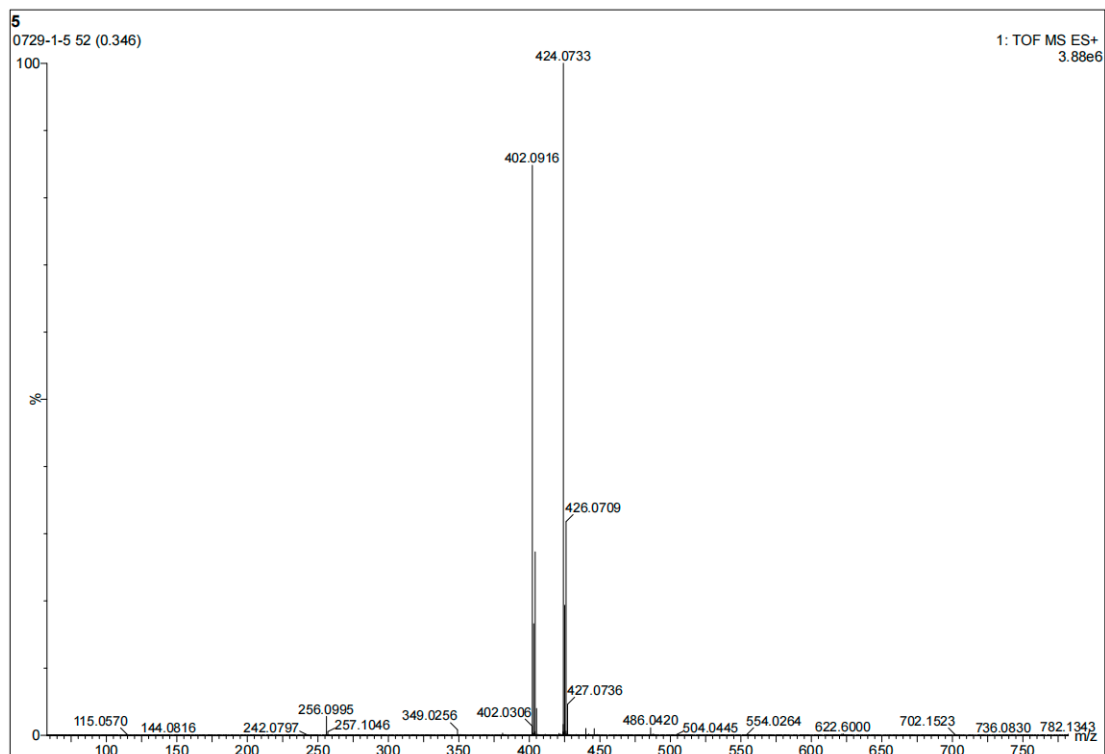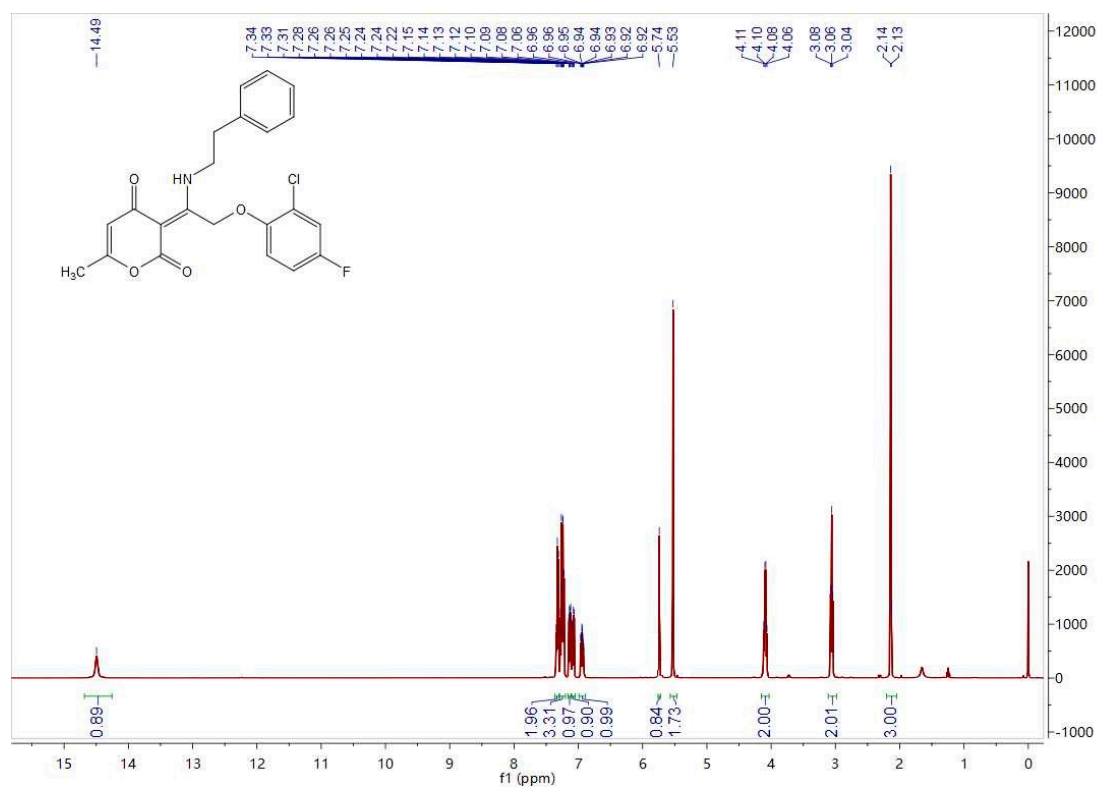

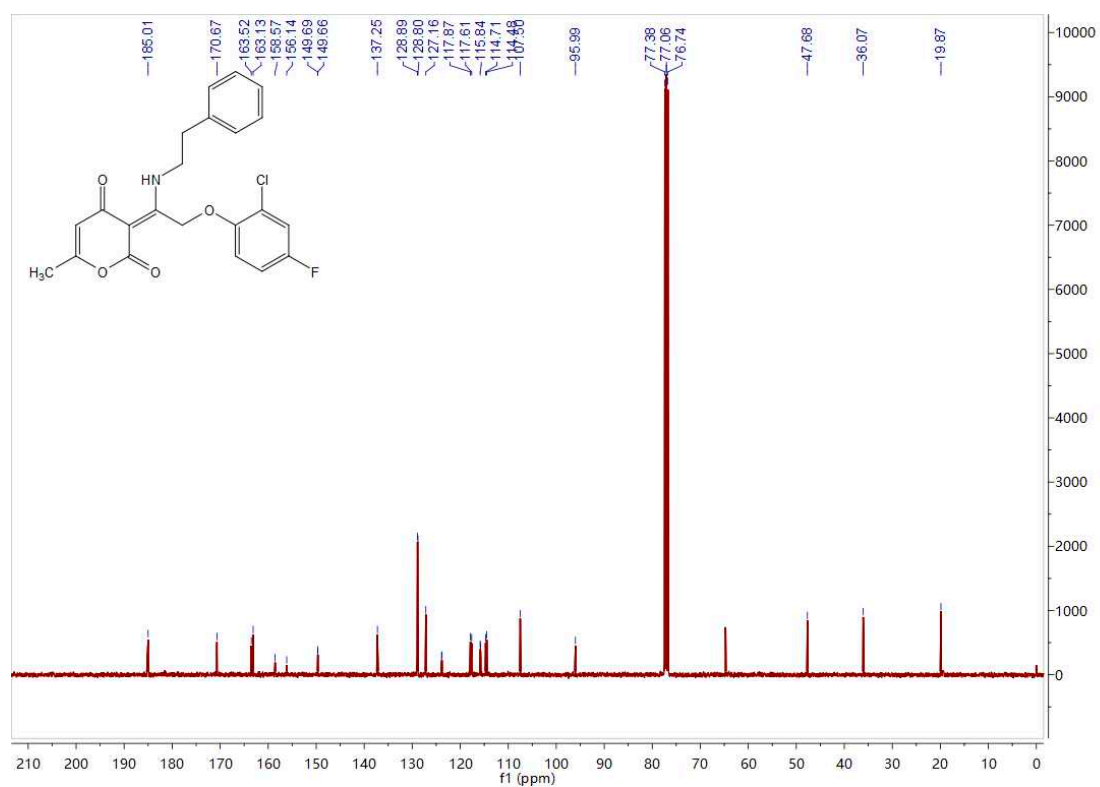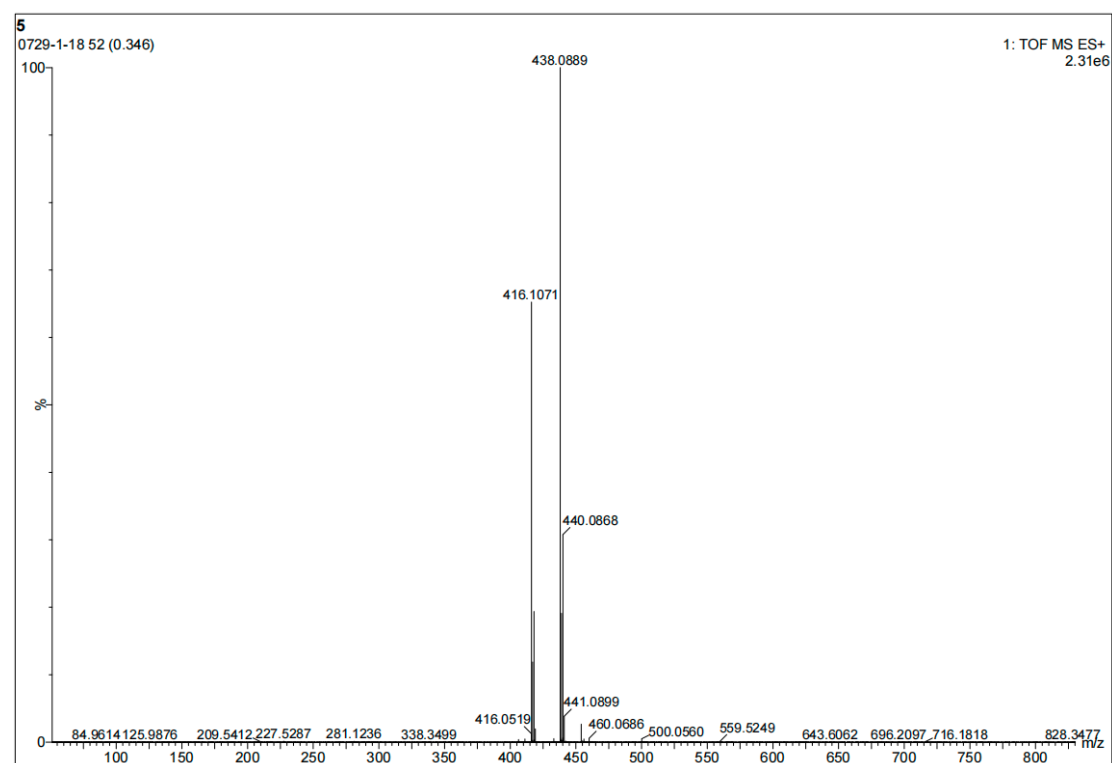

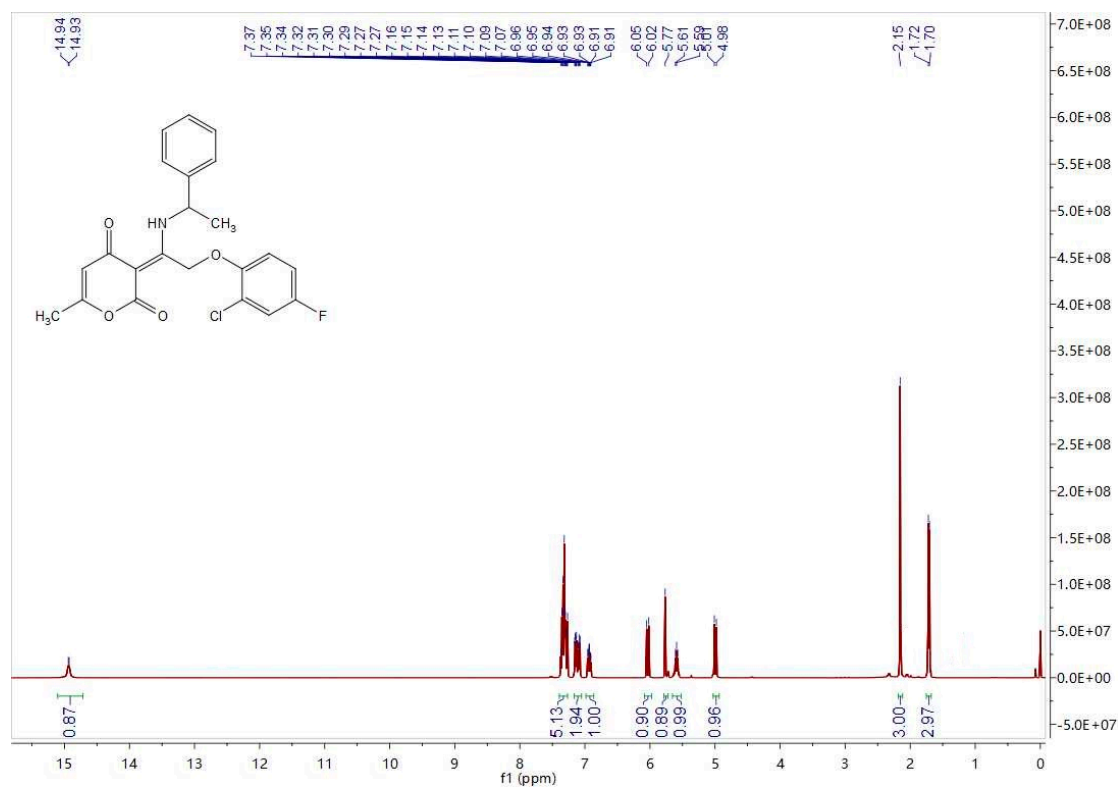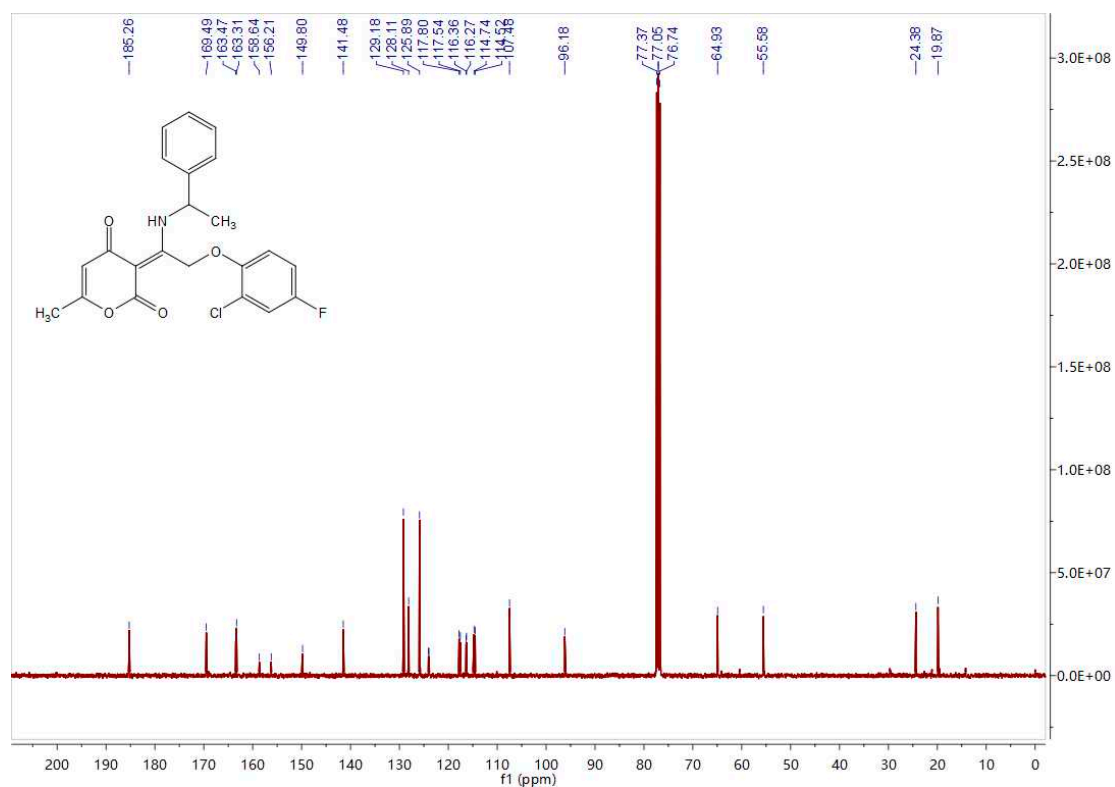

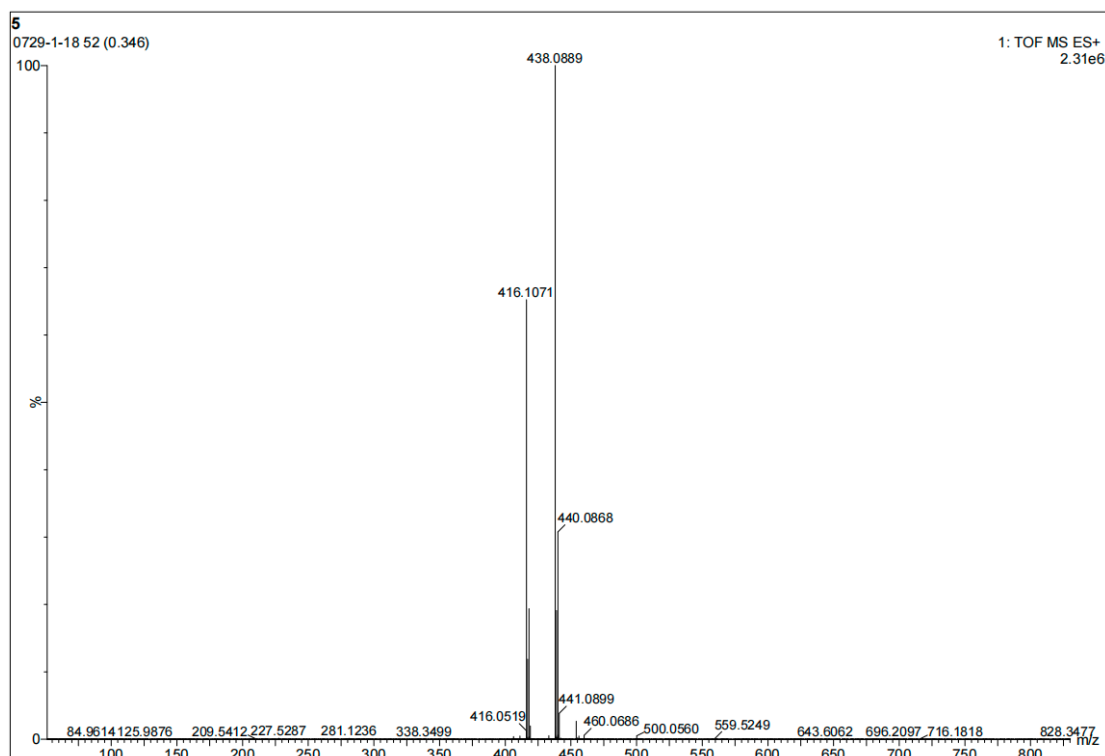

**Table S1** Effects (% inhibition) of target compounds **APD-I-1**–**APD-I-14** on loss of plant weight at a dosage of 1500 g ha<sup>-1</sup> after treatment 14 days (Pre) and 21 days (Post).<sup>a</sup>

| Comp.           | AM       |          | AR       |          | EC       |          | DS       |          |
|-----------------|----------|----------|----------|----------|----------|----------|----------|----------|
|                 | Pre      | Post     | Pre      | Post     | Pre      | Post     | Pre      | Post     |
| <b>APD-I-1</b>  | 0        | 30.7±3.1 | 0        | 27.2±3.9 | 8.3±1.8  | 0        | 0        | 6.7±0.4  |
| <b>APD-I-2</b>  | 25.7±1.4 | 41.2±1.6 | 56.3±3.2 | 0        | 27.5±2.7 | 0        | 29.1±1.2 | 12.4±0.7 |
| <b>APD-I-3</b>  | 8.7±1.3  | 24.1±0.6 | 0        | 8.3±2.2  | 22.5±4.4 | 0        | 0        | 11.8±0.7 |
| <b>APD-I-4</b>  | 19.4±2.1 | 4.3±0.9  | 0        | 20.1±6.6 | 10.8±2.4 | 0        | 8.6±2.4  | 8.2±1.0  |
| <b>APD-I-5</b>  | 14.4±2.6 | 47.0±0.7 | 10.0±2.4 | 49.5±2.1 | 0        | 0        | 0        | 19.0±0.7 |
| <b>APD-I-6</b>  | 13.7±3.8 | 27.7±1.2 | 13.3±2.4 | 54.2±1.6 | 23.0±4.3 | 0        | 8.1±2.4  | 27.0±0.7 |
| <b>APD-I-7</b>  | 60.2±1.8 | 39.4±1.5 | 71.4±4.6 | 26.6±3.9 | 47.1±2.6 | 0        | 17.5±0.4 | 22.3±0.6 |
| <b>APD-I-8</b>  | 7.7±3.0  | 3.0±0.8  | 26.7±4.8 | 33.3±2.5 | 16.2±2.1 | 7.8±2.5  | 0        | 0        |
| <b>APD-I-9</b>  | 71.4±1.7 | 21.4±0.8 | 81.3±2.3 | 12.4±1.8 | 25.5±2.3 | 24.9±2.5 | 78.8±0.8 | 17.7±2.7 |
| <b>APD-I-10</b> | 70.4±1.6 | 22.7±0.8 | 77.3±2.4 | 17.3±1.9 | 37.4±3.3 | 7.0±1.3  | 51.7±1.2 | 11.2±0.8 |
| <b>APD-I-11</b> | 14.4±2.7 | 5.2±1.0  | 0        | 0        | 7.4±3.5  | 0        | 0        | 0        |
| <b>APD-I-12</b> | 58.4±2.6 | 36.2±1.0 | 81.3±1.0 | 20.8±2.3 | 23.0±1.2 | 26.9±1.2 | 71.0±0.6 | 15.3±1.3 |
| <b>APD-I-13</b> | 39.9±1.6 | 31.7±1.0 | 53.3±1.9 | 37.7±2.3 | 32.4±3.2 | 6.9±1.7  | 42.8±1.8 | 23.3±0.9 |
| <b>APD-I-14</b> | 100      | 76.8±0.7 | 99.7±0.2 | 65.3±1.0 | 71.5±2.5 | 43.7±2.9 | 99.1±0.6 | 37.4±1.9 |
| AZ              | 100      | 100      | 100      | 100      | 82.1±0.8 | 100      | 100      | 86.0±2.4 |

<sup>a</sup> Each value represents the mean ± SD of three experiments; *Abutilon theophrasti* Medicus (AM), *Amaranthus retroflexus* L. (AR), *Echinochloa crus-galli* (EC) *Digitaria sanguinalis* (L.) Scop. (DS).

**Table S2** Effects (% inhibition) of target compounds **APD-I-14**, **APD-II-1**–**APD-II-19** on loss of plant weight at a dosage of 1500 g ha<sup>-1</sup> after treatment 14 days (Pre) and 21 days (Post).<sup>a</sup>

| Comp. | AM  |      | AR  |      | EC  |      | DS  |      |
|-------|-----|------|-----|------|-----|------|-----|------|
|       | Pre | Post | Pre | Post | Pre | Post | Pre | Post |



|           |          |          |          |          |          |          |          |          |
|-----------|----------|----------|----------|----------|----------|----------|----------|----------|
| APD-I-14  | 97.4±1.7 | 70.8±3.0 | 100      | 61.6±2.3 | 67.4±1.3 | 40.0±3.6 | 100      | 35.4±2.1 |
| APD-II-1  | 92.6±0.4 | 68.6±2.2 | 99.7±0.1 | 100      | 71.1±1.6 | 46.9±4.1 | 98.5±0.2 | 33.7±0.4 |
| APD-II-2  | 97.7±1.4 | 62.9±1.2 | 99.6±0.5 | 86.4±1.0 | 75.3±0.4 | 8.8±1.7  | 99.7±0.3 | 34.0±2.8 |
| APD-II-3  | 96.9±0.7 | 56.1±0.5 | 99.4±0.8 | 100      | 76.4±1.5 | 43.8±3.2 | 96.0±0.7 | 23.0±0.9 |
| APD-II-4  | 100      | 64.2±1.8 | 100      | 66.0±4.1 | 77.7±1.3 | 42.3±2.3 | 99.2±0.8 | 36.1±2.1 |
| APD-II-5  | 100      | 82.2±0.6 | 98.6±1.0 | 46.2±1.0 | 61.1±1.6 | 22.4±2.6 | 98.0±0.3 | 24.7±1.1 |
| APD-II-6  | 84.9±3.8 | 72.2±0.4 | 96.2±0.9 | 59.4±3.3 | 69.0±2.3 | 21.3±1.8 | 90.5±0.2 | 52.3±2.4 |
| APD-II-7  | 100      | 66.9±0.4 | 99.7±0.3 | 96.0±1.9 | 60.0±0.8 | 40.9±1.6 | 98.9±0.8 | 35.7±1.9 |
| APD-II-8  | 99.6±0.3 | 62.2±1.8 | 98.3±1.3 | 100      | 59.8±1.3 | 62.7±1.0 | 98.4±1.2 | 48.5±1.4 |
| APD-II-9  | 92.6±1.8 | 77.4±0.6 | 98.3±0.4 | 95.1±3.9 | 68.6±2.7 | 42.5±0.9 | 98.9±0.9 | 40.7±0.8 |
| APD-II-10 | 94.2±1.0 | 70.4±0.6 | 99.1±0.7 | 98.4±2.2 | 52.5±1.6 | 35.8±3.0 | 99.3±0.6 | 33.5±1.5 |
| APD-II-11 | 83.7±3.9 | 60.2±3.1 | 99.7±0.4 | 3.6±3.5  | 41.2±1.2 | 31.3±2.6 | 98.7±1.0 | 41.4±1.4 |
| APD-II-12 | 88.0±1.7 | 56.9±1.9 | 93.8±1.4 | 40.4±1.9 | 31.6±3.3 | 21.8±1.8 | 87.6±0.6 | 24.3±1.8 |
| APD-II-13 | 100      | 59.0±0.9 | 98.0±0.7 | 75.3±1.6 | 59.1±1.1 | 35.8±2.0 | 82.8±0.8 | 11.7±1.2 |
| APD-II-14 | 91.8±1.1 | 55.6±0.8 | 98.6±0.5 | 80.5±1.9 | 44.4±0.9 | 10.3±2.7 | 80.9±0.3 | 0        |
| APD-II-15 | 100      | 76.3±0.3 | 100      | 92.2±2.6 | 98.2±0.7 | 41.7±1.2 | 99.9±0.1 | 49.6±1.6 |
| APD-II-16 | 100      | 74.7±0.5 | 99.6±0.3 | 48.3±2.3 | 95.7±1.0 | 22.7±2.2 | 99.5±0.3 | 25.9±1.7 |
| APD-II-17 | 100      | 46.0±1.1 | 90.5±1.7 | 53.1±4.0 | 60.3±0.5 | 12.8±2.1 | 81.3±0.8 | 15.9±2.1 |
| APD-II-18 | 100      | 69.5±1.5 | 98.3±0.2 | 92.2±2.5 | 40.8±1.2 | 24.1±3.0 | 95.7±0.4 | 13.6±1.5 |
| APD-II-19 | 91.1±0.3 | 74.2±1.1 | 99.6±0.4 | 85.9±1.6 | 33.3±1.2 | 30.3±1.0 | 88.1±0.8 | 25.2±0.5 |
| AZ        | 100      | 100      | 100      | 100      | 89.6±0.7 | 98.0±0.7 | 100      | 87.6±1.0 |

<sup>a</sup> Each value represents the mean ± SD of three experiments; *Abutilon theophrasti* Medicus (AM), *Amaranthus retroflexus* L. (AR), *Echinochloa crus-galli* (EC) *Digitaria sanguinalis* (L.) Scop. (DS).

**Table S3** Effects (% inhibition) of target compounds **APD-I-14**, **APD-II-1–APD-II-19** on loss of plant weight at a dosage of 750 g ha<sup>-1</sup>, 375 g ha<sup>-1</sup>, 187.5 g ha<sup>-1</sup> after treatment 14 days under pre-emergence conditions.<sup>a</sup>

| Comp.    | Dosage (g ha <sup>-1</sup> ) | AM       | AR       | EC       | DS       |
|----------|------------------------------|----------|----------|----------|----------|
| APD-I-14 | 750                          | 91.3±0.8 | 94.9±4.5 | 41.5±4.0 | 98.8±0.8 |
|          | 375                          | 73.0±1.0 | 89.1±1.5 | 0        | 98.2±0.4 |
|          | 187.5                        | 16.5±1.0 | 74.5±0.7 | 0        | 61.3±1.6 |
| APD-II-1 | 750                          | 81.4±2.9 | 97.8±0.9 | 30.0±3.6 | 97.7±1.0 |
|          | 375                          | 41.7±4.1 | 90.5±0.6 | 0        | 87.4±1.4 |
|          | 187.5                        | 13.8±1.9 | 84.0±0.8 | 0        | 73.1±0.8 |
| APD-II-2 | 750                          | 89.8±0.3 | 98.9±0.9 | 40.5±5.0 | 95.9±0.7 |
|          | 375                          | 81.8±2.3 | 94.9±1.2 | 45.5±5.2 | 91.8±1.9 |
|          | 187.5                        | 21.3±1.6 | 89.1±2.4 | 14.0±1.1 | 71.6±1.3 |
| APD-II-3 | 750                          | 83.2±1.5 | 99.3±1.0 | 47.5±2.7 | 90.1±0.6 |
|          | 375                          | 57.7±2.1 | 94.9±0.8 | 5.5±2.1  | 95.3±1.2 |
|          | 187.5                        | 34.4±2.9 | 77.5±1.1 | 0        | 63.6±1.0 |
| APD-II-4 | 750                          | 76.7±1.4 | 99.3±1.0 | 33.0±2.1 | 99.7±0.4 |
|          | 375                          | 57.1±3.3 | 97.1±1.9 | 15.5±3.0 | 89.8±1.8 |
|          | 187.5                        | 16.9±2.0 | 84.0±1.1 | 0        | 58.0±1.9 |
| APD-II-5 | 750                          | 70.0±1.7 | 96.3±0.7 | 30.2±4.1 | 99.0±0.8 |
|          | 375                          | 60.0±2.2 | 96.3±0.7 | 20.0±1.7 | 59.0±2.9 |

|           |       |          |          |          |          |
|-----------|-------|----------|----------|----------|----------|
|           | 187.5 | 16.9±2.8 | 69.0±2.4 | 5.3±0.2  | 24.1±2.6 |
|           | 750   | 72.5±2.3 | 95.6±0.7 | 37.0±2.7 | 97.1±0.7 |
| APD-II-6  | 375   | 64.5±1.0 | 86.9±3.1 | 41.5±2.1 | 38.1±1.4 |
|           | 187.5 | 25.6±2.4 | 59.3±1.5 | 7.0±2.7  | 11.2±1.6 |
|           | 750   | 59.5±2.7 | 96.4±3.8 | 32.5±1.9 | 97.7±0.4 |
| APD-II-7  | 375   | 58.4±2.1 | 94.9±1.0 | 52.0±2.5 | 86.6±0.9 |
|           | 187.5 | 6.0±1.5  | 70.9±1.6 | 1.0±0.3  | 69.1±2.1 |
|           | 750   | 65.4±1.8 | 96.4±0.4 | 26.0±2.6 | 99.1±1.2 |
| APD-II-8  | 375   | 49.7±3.1 | 92.7±1.5 | 0        | 84.5±1.4 |
|           | 187.5 | 24.9±2.8 | 67.3±1.0 | 0        | 50.0±0.9 |
|           | 750   | 90.6±1.4 | 94.3±4.4 | 68.0±2.0 | 96.4±0.6 |
| APD-II-9  | 375   | 87.0±1.5 | 84.3±2.2 | 69.2±1.3 | 86.4±1.1 |
|           | 187.5 | 81.0±0.7 | 61.3±1.5 | 30.7±2.0 | 32.0±1.4 |
|           | 750   | 90.4±2.2 | 98.2±0.5 | 33.5±2.2 | 90.1±1.6 |
| APD-II-10 | 375   | 68.5±2.5 | 92.7±2.9 | 10.5±1.7 | 88.6±0.5 |
|           | 187.5 | 37.0±1.8 | 75.5±1.8 | 0        | 23.6±0.8 |
|           | 750   | 75.2±2.9 | 96.4±3.0 | 23.0±2.3 | 99.7±0.2 |
| APD-II-11 | 375   | 37.3±2.7 | 91.3±2.7 | 0        | 84.2±0.7 |
|           | 187.5 | 27.1±2.5 | 69.5±1.9 | 0        | 27.6±0.2 |
|           | 750   | 46.1±3.4 | 92.7±0.5 | 14.0±2.2 | 52.7±2.0 |
| APD-II-12 | 375   | 36.6±2.5 | 82.5±2.6 | 0        | 41.9±1.2 |
|           | 187.5 | 11.8±2.3 | 41.8±4.1 | 0        | 0        |
|           | 750   | 98.2±0.8 | 98.9±0.9 | 41.5±2.1 | 88.0±3.0 |
| APD-II-13 | 375   | 62.0±1.0 | 90.5±1.6 | 35.5±2.1 | 55.6±1.2 |
|           | 187.5 | 23.7±3.7 | 69.1±1.8 | 0        | 15.8±2.3 |
|           | 750   | 65.0±1.9 | 96.4±0.7 | 32.0±1.5 | 83.9±1.9 |
| APD-II-14 | 375   | 19.1±1.5 | 75.3±2.4 | 22.5±2.6 | 46.9±2.0 |
|           | 187.5 | 6.0±1.3  | 52.0±3.9 | 12.0±2.6 | 0        |
|           | 750   | 100      | 95.5±0.9 | 94.9±1.9 | 95.3±1.6 |
| APD-II-15 | 375   | 100      | 98.3±0.5 | 96.5±0.6 | 70.0±0.5 |
|           | 187.5 | 95.8±3.6 | 76.5±2.7 | 67.9±3.5 | 30.7±2.0 |
|           | 750   | 100      | 94.2±0.5 | 92.6±0.5 | 84.2±1.3 |
| APD-II-16 | 375   | 97.1±2.1 | 92.4±1.5 | 64.8±2.1 | 82.2±1.0 |
|           | 187.5 | 97.3±0.2 | 67.7±0.9 | 9.3±2.0  | 25.5±1.9 |
|           | 750   | 97.0±0.8 | 87.1±1.9 | 20.5±4.2 | 73.4±3.4 |
| APD-II-17 | 375   | 74.9±1.6 | 83.3±1.4 | 45.5±2.9 | 62.9±2.2 |
|           | 187.5 | 29.8±1.2 | 51.8±2.3 | 0        | 0        |
|           | 750   | 100      | 95.6±0.3 | 17.5±0.7 | 88.5±1.3 |
| APD-II-18 | 375   | 84.0±3.6 | 89.8±1.3 | 15.0±1.3 | 71.4±0.6 |
|           | 187.5 | 43.1±1.3 | 73.1±1.1 | 4.5±3.0  | 20.1±1.3 |
|           | 750   | 87.4±0.8 | 97.1±0.6 | 40.0±1.2 | 80.3±0.9 |
| APD-II-19 | 375   | 62.1±2.0 | 85.5±3.5 | 11.0±1.7 | 42.5±2.0 |
|           | 187.5 | 15.3±1.1 | 55.6±2.5 | 0        | 0        |
| AZ        | 750   | 96.0±0.5 | 100      | 79.0±1.2 | 97.2±0.5 |

|       |          |          |          |          |
|-------|----------|----------|----------|----------|
| 375   | 81.6±0.5 | 100      | 62.3±3.4 | 96.0±0.6 |
| 187.5 | 74.3±2.9 | 80.2±3.3 | 24.7±3.3 | 53.6±3.7 |

<sup>a</sup> Each value represents the mean ± SD of three experiments; *Abutilon theophrasti* Medicus (AM), *Amaranthus retroflexus* L. (AR), *Echinochloa crus-galli* (EC) *Digitaria sanguinalis* (L.) Scop. (DS).
